# Supplementary material for: Obesity induced by high-fat diet is associated with critical changes in biological and molecular functions of mesenchymal stromal cells present in visceral adipose tissue
Source: Aging (Albany NY). 2020 Dec 27;12(24):24894–913. doi: 10.18632/aging.202423 (PMC7803587; doi:10.18632/aging.202423)
Supplement: Supplementary File 1 [file aging-12-202423-s001.xlsx]

## Sheet: List of proteins
Supplementary File 1. List of proteins identified in MSC proteome and secretome.
Secretome ND	Secretome HFD	Proteome ND	Proteome HFD
P49722	P49722	Q3U2K8	A0A0U1RP87
Q9WV54	Q9WV54	Q9JKB1	Q9JKB1
P62317	P62317	P49722	D3YX62
Q3UPI1	Q3UPI1	Q6ZQ06	P49722
P05202	Q3UHZ7	P35585	Q99PV0
O70475	P05202	P17751	P17751
P63276	O70475	Q8BHB4	Q8BHB4
P17751	P63276	Q9DCS9	Q9DCS9
Q8VHX6-2	P17751	Q78IK4	Q78IK4
Q8C7E4	Q7M739	Q9CQN1	Q9CQN1
P37889	Q8VHX6-2	Q9DB15	Q9DB15
Q5MJS3	Q8C7E4	D3Z4U0	D3Z4U0
P68254	P37889	O88396	P37889
Q64449	P14115	Q9D7A8	Q9D7A8
O09172	Q64449	Q3TXV4	Q3TXV4
Q9R0E1	O09172	P68254	P68254
P14602	P47941	Q9D7N9	O54784
Q792Z1	Q9R0E1	P47941	Q9D7N9
Q6ZWQ9	P60670	Q6ZWZ2	P47941
Q9CR86	E9Q0U7	P14602	E9Q0U7
P51655	A0A0G2JH04	A0A140LJ29	P14602
Q640N1	P54823	Q9D0K2	Q3UZD0
Q9D0K2	P14602	P62843	A2ADR8
Q6IRU5	G5E8V9	Q8C570	E9QMV2
E9QN70	Q792Z1	Q9CR41	Q9D0K2
Q922F4	Q6ZWQ9	A0A0R4J008	O54782
P10148	P51655	Q62347	P62843
P01887	Q9CR86	Q922Q8	Q8C570
P47877	Q640N1	Q8CIV8	Q9CR41
P14869	Q6IRU5	Q9DBF1	A0A0R4J008
P12032	E9QN70	Q60710	Q62347
P68369	Q922F4	Q6P5E4	Q922Q8
Q9CXW4	P01887	Q6GSS7	Q8CIV8
Q9CWJ9	P47877	A2AU62	Q811D0-3
A2BE45	P14869	Q9CQM8	Q9DBF1
Q8BPB5	P12032	Q9Z1Y4	Q60710
Q3UUU2	Q60710	Q99KC8	Q6P5E4
P24527	Q9CXW4	Q8BPB5	Q6GSS7
Q61753	Q9CWJ9	P82347	Q8R1X6
Q3UPN1	P68369	Q8R3F5	A2AU62
Q60598	Q9CQM8	D3YU17	Q9CQM8
P07724	A2BE45	Q9JIG8	Q9Z1Y4
Q3UZ39	Q99KC8	Q7TMB8	Q99KC8
A0A0G2JGL0	Q8BPB5	Q9CZU3	Q8BPB5
Q62523	P24527	A0A452J8A5	Q8R3F5
E9PWE8	Q61753	Q62523	Q8BYW9
Q9Z175	Q3UPN1	E9PWE8	D3YU17
O35344	Q60598	Q8R480	Q9CZU3
Q64669	P07724	Q9CQC5	Q62523
Q8C845	Q9WVJ3	O35344	E9PWE8
Q9R045	P17879	V9GXJ1	O35344
Q60864	Q3UZ39	O88520	Q69ZS0-3
E9Q0S6	Q62523	S4R2A9	O88520
Q9D0R2	E9PWE8	Q9D0R2	V9GXJ1
Q99KJ8	Q9Z175	P35505	Q5SS83
P47911	O35344	Q9QUH0	S4R2A9
Q8CIB5	Q8C845	E9Q798	Q9D0R2
Q9D8X2	Q64669	Q8CIB5	Q8K120
Q9D8W5	Q8QZY1	Q3UMA3	P35505
Q9DCL9	Q9R045	Q9DCL9	Q9QUH0
P52480	Q60864	Q8K4Q8	F6QA74
Q3U4W8	Q9D0R2	P47758	Q8CIB5
P62889	F6QA74	Q3TE85	Q3UMA3
Q8BLX7	Q99KJ8	Q9CPV4	Q9DCL9
P53690	P47911	Q3UGN9	P47758
P56480	Q8CIB5	Q6ZWZ4	Q76N33
Q9CYN9	Q9D8X2	Q9D967	Q9CPV4
Q8BND5	Q9D8W5	G3X9Q6	Q3UGN9
E9PYI8	P52480	Q8BI06	Q62418-2
Q9CZ30	Q3U4W8	Q9CQL7	Q6ZWZ4
Q9QXS6	P56480	P80313	Q9D967
Q78ZM0	Q99KH8	Q78JW9	G3X9Q6
Q9CVB6	Q9CYN9	B0R091	Q9CQL7
P43028	Q8BND5	P47809	P80313
Q8BK64	E9PYI8	Q9JHW4	Q78JW9
P80313	Q9CZ30	P61021	P61021
P51859	Q9WVQ5	E9Q586	P42932
P80318	Q78ZM0	P42932	Q8BFW7
Q99LJ6	Q9EST5	Q91YJ3	Q9CY58-2
Q3U7R1	A0A0A0MQM0	Q8BFW7	P62852
F6YVP7	Q9CVB6	Q9JM76	Q9JM76
P11152	P43028	Q9CQ10	Q9CQ10
A0A0R4J0G6	Q8BK64	Q9D6Y7	Q9D6Y7
P42932	P80313	O35143	O35143
Q8BFW7	P51859	Q9WUM5	Q9WUM5
B7ZNL2	P80318	Q03963	Q03963
Q9DAV6	Q99LJ6	A0A0J9YUR2	A0A0J9YUR2
Q8CG16	Q3U7R1	Q3TFP0	Q9JL35
Q9JM76	P11152	Q9JL35	Q6P542
P19324	A0A0R4J0G6	Q6P542	Q8CAP3
P40142	P42932	Q8CAP3	P09671
A0A0G2JEA5	Q8BFW7	P37889-2	P58059
Q8VCN5	B7ZNL2	P09671	P62814
P08905	Q9DAV6	P58059	Q61171
P01027	Q8CG16	P62814	Q8BU30
P37889-2	Q9JM76	Q8CH25-2	J3QJX3
P62814	Q99K48	Q61171	Q9DBG3
Q61171	P19324	Q8BU30	Q9JHU4
Q9QZD9	P40142	J3QJX3	P10711
Q9DBG3	Q99LD8	Q8BWW9-3	Q921H8
Q9JHU4	P08905	Q9DBG3	Q8BVQ5
Q8BVQ5	P01027	Q9JHU4	Q6PGL7-2
Q9ET54-6	Q3TTY5	P10711	P97765
Q9D6X6	Q60715	Q921H8	Q3U1J4
Q11011	P37889-2	Q8BVQ5	Q6P1F6
O08804	P62814	Q9D6X6	Q8C3W1
Q6P1F6	A0A1L1SUX8	P97765	P61961
Q3TW96	Q61171	Q3U1J4	Q8K4L0
Q02819	Q9QZD9	Q6P1F6	Q8VHI3
P25444	P70202	Q02819	Q923D5
Q8C3W1	Q9JHU4	Q8C3W1	Q8JZM7
Q62356	P10711	P61961	Q8BMF4
P61027	Q9ET54-6	P10833	E9Q634
P62774	Q9D6X6	Q8K4L0	A0A0A6YVU8
P38647	Q11011	Q8VHI3	P56812
P02463	Q3U1J4	Q923D5	D3Z3E8
P47879	Q6P1F6	Q8JZM7	Q9CZR8
H7BX99	Q3TW96	Q8BMF4	Q60692
Q8BMJ3	Q02819	E9Q634	A2AEX8
P62830	P25444	A0A0A6YVU8	E9QMB7
P56812	Q8C3W1	P56812	Q3TQ27
Q80X90	Q62356	A0A0J9YVC1	Q8BMD8
E9Q8I0	Q4VAA2	D3Z3E8	I1E4X5
Q8CGC7	P62774	Q9CZR8	Q80V26
P62908	P38647	Q60692	E9Q9Q2
A0A087WR50	Q5SUS9	A2AEX8	A0A494BB03
O08553	P02463	Q8BMD8	P17426
Q60692	P47879	Q80V26	Q9CXT8
P50247	H7BX99	Q9CXT8	Q6NSP9
P70460	P62830	Q9ET26	Q923D2
P62754	P56812	Q6NSP9	P56375
P97351	E9Q8I0	Q923D2	P97379
F7AA26	Q80X90	P56375	G5E850
P17426	Q8CGC7	P97379	Q05CL8
O89023	P62908	G5E850	P57780
Q64514	A0A087WR50	P57780	Q91YT8
O88342	O08553	Q6ZWQ7	Q91XB0
Q9EPL8	Q60692	A2A9I0	P51163
Q6NSP9	P50247	P51163	Q6PDL0
Q9Z0N1	P70460	Q6PDL0	Q9CQ69
Q61024	A0A0R4J0N0	Q9CQ69	Q9WTU6
P97379	P62754	Q8K021	P45377
P62264	P97351	P45377	P23927
P57780	P17426	P23927	Q69Z38
Q5RKN9	Q64514	Q69Z38	Q921K8
A0A0G2JEK2	O88342	Q921K8	P20029
A0A0R4J086	Q9EPL8	P20029	Q61881
A0A5F8MPE1	Q6NSP9	Q61881	Q9CQQ7
P55302	Q923D2	Q9CQQ7	P97823
Q9D8E6	Q9Z0N1	Q4VBE8	P20065
Q8BV57	Q61024	P97823	Q8QZT1
P20060	P97379	P20065	Q9D5V6
P23927	P62264	Q8QZT1	Q91VC7
P20029	P57780	Q9D5V6	Q8BU14
P62281	Q5RKN9	Q6PDI5	Q9QYB1
Q8BJW6	A0A0G2JEK2	Q91VC7	Q8BXZ1
P27546	A0A0R4J086	Q8BU14	P63017
Q9WVE8	A0A5F8MPE1	Q9QYB1	O54833
Q9CZ44	Q6PDL0	P35293	Q3TZZ7
Q9EPC1	Q9D8E6	Q8BXZ1	G3UX35
P63101	Q8BV57	P63017	Q5SQ20
P20065	P20060	Q8VCP8	Q9CPP0
P55288	P23927	Q3SXD3	Q8VBX6-2
Q9QZM0	P20029	O54833	Q99KF1
Q6NXL1	P62281	Q3TZZ7	Q61696
G3UYX7	Q8BJW6	G3UX35	Q3TCD4
Q9QYB1	P27546	Q5SQ20	Q6ZPU9
Q3TML0	Q9WVE8	Q9CPP0	Q8C5G6
P70372	Q9EPC1	O54950	Q9QZE5
Q9D8N0	P63101	E9Q1J7	A0A0N4SUH4
Q99JY9	P20065	Q9Z0R9	Q61425
Q3UDM0	P60867	Q99KF1	Q8CHT0
P80316	G3X9V2	Q61696	F8WID5
Q9Z1Z2	Q9QZM0	A0A1W2P7K6	B1AT92
P63017	Q8K310	Q9QZE5	Q8C156
Q9Z2U0	Q6NXL1	G5E8R3	Q8BI84
Q8BH43	G3UYX7	Q61425	Q9CQU0
P59999	Q9QYB1	Q8CHT0	D3YZ62
Q9CQM5	Q3TML0	F8WID5	B2RPU8
Q8CI51	P70372	Q9D0E1-2	Q8BK30
P28301	Q9D8N0	Q99LG2	Q8C2Q7
Q9QZF2	Q99JY9	A0A286YCQ5	A0A498WGK2
P07356	Q3UDM0	Z4YKT6	Q9QZB7
Q9CZD3	P80316	Q8BI84	Q64737
Q5NCU4	Q9Z1Z2	Q9CQU0	O55091
Q8BP67	P63017	D3YZ62	G3X8Y3
Q9CPW4	Q9Z2U0	B2RPU8	O35127
P62315	P59999	Q8BK30	P54728
Q6ZWZ6	Q9CQM5	Q8C2Q7	Q8CHP8
Q80YX1	Q8CI51	A0A498WGK2	Q8VEK3
Q9JME2	P28301	Q9QZB7	Q9R1P4
A0A1B0GRP7	Q9QZF2	Q64737	Q6NZB0
E9PWQ3	P07356	O55091	O08583
E9Q9E1	Q9CZD3	G3X8Y3	Q3V1A4
Q61576	Q8BP67	Q9DBL7	Q9Z0S1
P62806	Q9CPW4	O35127	Q922I7
Q9QZE5	P62315	P54728	Q80XR5
Q01149	A0A1B0GRP7	Q9JLB0	Q6ZQM8
Q9R0Y5	E9PWQ3	Q8CHP8	Q8BHG9
Q99K41	Q61576	Q8VEK3	E9QJT5
Q61425	E9Q9E1	Q9R1P4	P50396
A0A140LJL0	P62806	Q6NZB0	O09131
P12970	Q9QZE5	O08583	Q99JR1
F8WID5	Q01149	Q3V1A4	A0A338P769
P67984	Q9R0Y5	Q9Z0S1	E9QJW0
Q9DAW9	Q99K41	Q80XR5	F7CHD9
P11499	Q61425	Q6ZQM8	P15066
P99024	Q921V5	Q9CPS7	Q9DB27
P00493	A0A140LJL0	P50396	Q8BK67
F8WH81	P12970	O09131	Q8BFQ8
O35188	F8WID5	A0A338P769	Q9Z160
Q8C2Q7	P67984	Q99JR1	Q91VK1
O89086	Q9DAW9	E9QJW0	P30681
P47880	P11499	P15066	P18155
Q8BP43	P99024	Q8VE11-2	A0A1B0GT81
Q64737	Q8R550-3	Q8BK67	Q9D1M7
Q9JLV1	P00493	Q8BFQ8	Q9DB77
Q6PB44	F8WH81	Q91VK1	Q9WTP7
Q9Z1Q5	Q91V88	P30681	G3UXZ5
P47963	Q8C2Q7	P18155	P62488
P54728	O89086	Q9D1M7	Q62087
A0A5F8MPB9	P47880	Q9DB77	G3UYV7
P68372	Q9CQF7	Q9WTP7	P61164
P14873	Q8BP43	G3UXZ5	Q03350
Q8VEK3	Q64737	P62488	Q3TTF6
Q9R1P4	Q9JLV1	Q62087	P09528
E9Q0N0	P30416	P61164	Q3ULW8
O70591	Q6PB44	Q03350	Q80UY2
Q6ZWQ5	Q9Z1Q5	Q3TTF6	Q99LC3
O35226	H7BX95	P09528	Q9CRA8
Q6PGH2	P54728	Q3ULW8	P50516
Q561M1	A0A5F8MPB9	Q80UY2	Q9D091
Q8C9W3	P68372	Q99LC3	Q9ERB0
Q922I7	P14873	P50516	P84104
Q80XR5	Q8CHP8	Q9ERB0	Q76LS9
P58871	Q8VEK3	Q8BJU0	Q8BJU0
B0R1E3	Q9R1P4	A2BDX3	A2BDX3
Q64152	E9Q0N0	Q99L28	Q99L28
Q925I7	O70591	P16045	P16045
P97298	Q91WK2	Q7TPV4	Q7TPV4
A0A1W2P6P1	O35226	Q8C854	Q8C854
Q6GT24	Q8BTZ7	P62274	P62274
Q62318	Q6PGH2	Q80ZX0	Q80ZX0
O88207-2	O08583	Q8CJ69	P06745
Q62165	Q8C9W3	P06745	Q61249
P15116	Q922I7	Q61249	Q9D898
Q9JHW9	Q80XR5	Q9D898	P35385
O09131	P58871	P21956	Q80Y20
P18406	B0R1E3	P35385	Q8K2A1
Q8BFR4	Q64152	H9H9T1	Q8CCF0
Q8R1F1	P97298	Q8K2A1	P10605
Q02105	Q7TQG5	Q8CCF0	A0A0R4J218
Q61112	Q6GT24	P10605	B7FAU9
Q8BMS2	O88207-2	Q3U0V2	Q9Z0S9
F8VQJ3	Q62318	B7FAU9	P11087
P70428	Q62165	Q9Z0S9	Q9CXY6
Q61477	P15116	P11087	Q9Z247
E9PWY9	Q9JHW9	Q9CXY6	Q9WUP7-2
Q8VDM4	P50396	Q9Z247	Q9CQF9
A0A0B4J1E7	O09131	Q9CQF9	P58252
P19788	Q8R1F1	D3Z080	P62751
Q9CR00	Q61112	P58252	Q9Z1A1
P98063	O54941	P62751	Q91YJ2
F2Z4A3	Q8BMS2	Q9Z1A1	A2AR02
Q99JI1	F8VQJ3	Q91YJ2	Q80UG5-3
P97346	P70428	A2AR02	P59325
P60710	Q61477	Q80UG5-3	Q78PY7
P97927	Q8VDM4	P59325	Q9CPY7
Q9Z2L6	Q02788	Q78PY7	A0A1B0GSX0
E9PZ16	A0A0B4J1E7	A2AEM2	Q61792
P80317	Q9CR00	Q9CPY7	P67778
P48024	P98063	A0A1B0GSX0	Q8BT60
Q03350	Q9DB27	Q61792	A0A0R4J0P1
Q61553	F2Z4A3	E9PWX8	A0A0A6YW28
Q9WVK4	Q8BK67	P67778	Q8BP48
Q9JJ28	Q99JI1	Q8BZX4	E9QPE7
Q9ERD7	P97346	Q8BT60	F6RNF9
E9Q043	P60710	A0A0R4J0P1	Q61166
P68040	P30681	A0A0A6YW28	A0A0A6YWM5
Q8BL66	P97927	Q8BP48	A0A0R4J0M1
P50516	Q9Z2L6	E9QPE7	P18608
P97314	P28474	Z4YKM2	P14211
P84104	E9PZ16	Q61166	G5E870
P14131	Q9Z1F9	A0A0A6YWM5	Q9D3D9
P97857	P80317	A0A0R4J0M1	P40240
P50580	G3UYV7	P97496-2	G3X922
Q922W6	P48024	P18608	Q9QUJ7
Q62000	Q8K354	P14211	Q9CYD3
P99027	Q03350	Q9D3D9	Q62093
P45878	Q61553	Q91W39	P62960
Q05186	Q9WVK4	P40240	Q8K411-3
P16045	Q9JJ28	G3X922	Q9CQI6
Q9CQR2	Q9ERD7	Q9QUJ7	Q3UPE3
E9Q718	F8WHL2	Q9CYD3	A2AAY5
E9PY39	G3XA35	Q62093	Q99NB9
Q8CJ69	A0A3Q4EGK3	P62960	Q8BJ71
P06745	A0A2I3BQZ9	Q8K411-3	Q04750
P97464	P68040	Q9CQI6	Q9ESD7-3
Q9DBR7	F8VPK5	Q8CDM8	E9Q317
P21956	P97314	A2AAY5	Q99N92
P29268	P84104	Q99NB9	A0A338P7E3
P10605	P14131	Q8BJ71	Q9Z0H4-6
Q8VEE1	P97857	Q04750	Q9D1M0
P62082	P50580	Q91WG2	Q91WE4
P26516	P24270	Q9ESD7-3	E9QNH6
P70441	Q62000	E9Q317	Q9WTP6
B7FAU9	B7ZCL8	A8Y5N8	P26443
P11087	P99027	Q99N92	Q8BH80
Q3TQP6	Q8BTS0	Q9Z0H4-6	Q80UU9
O70433	P45878	Q9D1M0	Q8BH59
Q9EPL2	Q05186	Q9CZT5	O09110
P58252	P16045	Q91WE4	Q9CQ79
P19157	Q9CQR2	Q61838	A0A1D5RLZ3
Q3UHX2	E9Q718	Q9WTP6	B7ZCI2
P62751	E9PY39	P26443	Q99P72
Q9Z204	Q8CJ69	A0A286YDA2	P14576
A2AH25	P06745	Q8BH80	Q9CR98
Q80UG5-3	P97464	Q68FD5	Q9CY64
P59325	Q9DBR7	Q8BH59	Q8VCI5
Q78PY7	P21956	Q80UU9	Q3U9N4
Q9CPY7	P35385	O09110	P12382
Q00493	P29268	O55239	P28740-2
A0A1B0GSX0	P10605	Q9CQ79	P48771
O89017	Q8VEE1	Q99P72	P97429
Q61792	P62082	P14576	Q6IFZ6
A0A087WSN6	P70441	Q9CR98	Q3TWW8
Q9JHI0	B7FAU9	Q9CY64	Q3UI33
P41105	P11087	Q8VCI5	P62311
Q9WU78	Q9CY58	Q3U9N4	A0A0R4J0Q5
Q3U962	Q9CXY6	E9PUN3	A1BN54
Q3UE92	O70433	P12382	P70271
Q8BGD9	Q9EPL2	P28740-2	G3X8U3
Q61166	P58252	P48771	A2API8
Q9EQC7	P19157	Q62448-2	F8WHY8
P62242	F6XJP7	P97429	Q8BFQ1
Q8BG32	Q3UHX2	A2AQR0	Q8VDW0
Q8CIN4	P62751	Q3TWW8	Q5SUR0
Q3TJD7	Q9Z1A1	Q3UI33	P25206
F8VPR1	A2AH25	P62311	A6ZI44
P62918	Q80UG5-3	A0A0R4J0Q5	Q8JZX4
Q9R1P1	P59325	A1BN54	A0A384DV79
Q9CR16	A0A0R4J097	D3YWJ4	Q9D3P8
A0A0J9YUZ4	Q78PY7	P70271	Q8R3X6
P21107-2	Q9CPY7	G3X8U3	P16460
Q8BKC5	Q00493	A2ABY3	Q922B2
Q8R1B4	A0A1B0GSX0	Q8BFQ1	P08113
Q61768	O89017	Q8VDW0	Q9D0F9
Q62093	Q61792	Q99L48	A2AEY2
P62960	A0A087WSN6	Q5SUR0	P14206
P42669	Q9JHI0	P25206	O08917
P61358	P41105	A6ZI44	P97310
Q9D0T1	Q9WU78	Q8JZX4	Q8BPG6
P61161	Q3U962	E9PUB0	Q3UDE2
Q91YR1	Q3UE92	E9PX94	E9QAS4
Q9DCD0	Q3TDP9	Q9D3P8	A0A571BEI2
P27046	Q8BGD9	P16460	Q62219
P09411	E9QPE7	Q3UVP0	Q3TPJ8
Q9Z1R9	O35841	Q922B2	G5E8E1
Q9CZT5	Q61166	P05784	Q3TPE9
Q8R4G6	Q9EQC7	P08113	Q9EQU5-2
P29416	P62242	Q80YX1-2	O54825
Q9WTP6	Q8VBV7	Q9D0F9	E9QAQ5
Q99LP6	Q8BG32	P14206	Q6PDY2
P26443	Q9D0J8	O08917	A1L3S7
A2AJY2	Q8CIN4	A0A494BBL8	P70404
G5E899	Q3TJD7	Q8BPG6	Q61712
Q8BH80	F8VPR1	Q3UDE2	B1AQZ0
Q9R0P9	P62918	E9QAS4	P22907
Q9WTQ5	Q9R1P1	A0A571BEI2	Q9DAU1
O08749	A0A0J9YUZ4	S4R1P5	P18242
Q99P72	Q9CR16	Q62219	G3UX48
Q3U9N4	P21107-2	Q3TPJ8	Q9JJI8
Q60675	Q8BKC5	Q8K2T8	F8VQ95
P99029	Q8R1B4	A0A140LHA2	Q3U2G2
Q9R0P5	Q61768	Q9EQU5-2	Q91VE6
P16546-2	Q62093	O54825	Q8BHN3
P47878	P62960	E9QAQ5	P97807
Q6PI17	P42669	Q8WTY4	Q6NZR5
Q8R5C5	P61358	Q9JM51	Q02257
P48759	Q9D0T1	Q6PDY2	Q9CQV8
Q9CQ60	Q99NB9	P70404	Q9CQ71
O54724	P61161	Q61712	Q61164
P80315	Q91YR1	P22907	Q6A058
P70670	Q9DCD0	Q3UHJ0-2	Q9D786
P28654	P27046	Q9DAU1	Q99L47
A1BN54	P09411	P18242	A2AVJ7
P26041	Q9Z1R9	Q9JJI8	Q9JM13
Q59J91	Q9CZT5	G3UX48	P62835
O09164	Q5SX75	F8VQ95	D3YWD1
Q04998	P50608	Q3U2G2	E0CXC7
P14069	P29416	Q80U95	Q9R1T2
P26231	Q9WTP6	Q91VE6	P48962
Q99MN1	P26443	P84244	Q9CQE3
P14901	A2AJY2	Q8BHN3	Q9D8U8
P02798	O54774	P97807	Q99JF5
Q08091	G5E899	L7N451	Q922D8
E9Q616	Q9R0P9	Q811U4	P0C0A3
Q8BFQ1	Q9WTQ5	Q6NZR5	Q8BX02
P11688	O08749	Q02257	Q6ZWV3
Q61937	Q6AXB7	Q9CQV8	P31324
Q9JKR6	Q99P72	P03995	A0A0U1RQ37
A6ZI44	E9Q827	Q9CQ71	A0A0R4J093
A0A0A0MQM7	Q3U9N4	Q61164	Q62348
P04925	Q60675	Q9CQV4	Q91ZA3
P99026	P99029	A2AVJ7	A0A0R4J065
P70296	Q9R0P5	Q9JM13	F7ACR9
P10404	P16546-2	P62835	Q9JHH9
Q3TXS7	Q8K2B3	A2ATL1	Q99LF4
Q9WVA4	Q6PI17	Q9JHS3	P51660
P62334	P62196	Q9R1T2	F8VQK5
P31938	Q8R5C5	P48962	Q8BJH1
Q9CQ65	P48759	B8JK39	Q3UVG3
P11983	Q9CQ60	Q9CQE3	B2ZAC8
P16460	O54724	Q9D8U8	P57759
Q922B2	P80315	Q922D8	Q9CQ40
P62827	P70670	P0C0A3	F8VQN6
Q6PB93	P28654	Q9R112	F8WGL3
P09405	Q6IFZ6	E9Q3P9	P35279
P48036	A1BN54	Q8CFV9	Q9EP72
Q3UQ28	P26041	Q8BX02	O55201
P62737	O09164	Q6ZWV3	Q921M3
P62192	Q04998	P49710	Q8BY87-2
P08113	P14069	P31324	Q3TU36
Q80YX1-2	P26231	A0A0U1RQ37	E9Q449
Q9D0F9	P14901	A0A0R4J093	P68510
Q60865	Q99MN1	Q62348	P49717
Q9Z100	P02798	Q91ZA3	O35593
Q08093	Q08091	A0A0R4J065	P63028
F8WJ99	E9Q616	Q9JMD0	A3KGB4
P14206	Q8BFQ1	Q9JHH9	Q9D7B7
P23116	Q61937	Q99LF4	O55222
A0A0R4J0C9	Q9JKR6	P51660	Q9DCF9
Q9CRB5	A6ZI44	Q9DCZ4	O88271
P62962	A0A0A0MQM7	Q8BJH1	Q8R2Y2
Q3TMX5	P04925	Q3UVG3	Q9WUU7
P32921	P99026	P57759	A0A2R8VHH1
A0A0G2JEX1	P70296	Q9CQ40	O70194
A0A286YEB7	Q9WVA4	F8VQN6	O88630
Q3TVK3	P62334	F8WGL3	Q9JHI5
Q8C483	Q9CQ65	P35279	P20152
Q62219	P11983	Q8VC85	Q60973
A0A5F8MPN8	P16460	Q8R2G6	Q8R0X7
G5E8E1	Q922B2	Q9EP72	Q9CR95
Q64010	Q9CQI3	Q921M3	Q9D7S9
Q3UPH1	P62827	Q8BY87-2	Q8C8U0
E9QA15	Q6PB93	Q3TU36	E9Q0A7
O70435	P09405	E9Q449	P62137
Q63918	P48036	Q61578	Q8VHE0
P26645	Q3UQ28	P68510	Q9DCH4
Q5SVG5	P62737	P49717	Q9CX86
Q9ET01	P62192	O35593	O55029
E9PZF0	P08113	P63028	Q9CR57
P60843	Q80YX1-2	E9Q1T9	O88685
P10493	Q9D0F9	A3KGB4	Q7M6Y3
P70698	Q60865	Q9D7B7	P59708
A0A1B0GSG5	A0A1Y7VJ48	O55222	A2AVR9
Q04857	Q9Z100	Q9DCF9	Q99JI6
O88968	Q08093	O88271	F6RPJ9
Q3U2G2	F8WJ99	Q8R2Y2	Q9CQ19
F8WIT2	A0A1C7CYV0	Q9WUU7	Q99MJ9
Q64727	P14206	A0A2R8VHH1	P51863
Q04447	P23116	O70194	Q8R361
Q9CPX4	A0A0R4J0C9	O88630	Q9D945
Q9JHJ0	Q9CRB5	Q9JHI5	Q9ERE7
P97807	P62962	P20152	Q8K224
P07901	Q3TMX5	Q60973	E9QQ10
Q9CQV8	P61979	Q8R0X7	D3YTR5
Q61081	A0A0G2JEX1	Q9CR95	E9PUG7
F8WIV2	A0A286YEB7	Q80UM7	P26883
Q7TPR4	Q3TVK3	Q9D7S9	A2AKI5
Q91XH5	Q8C483	Q8C8U0	Q8R317
Q9WV55	Q62219	P62137	A0A571BGG1
A2AVJ7	A0A5F8MPN8	Q8VHE0	Q9WV95
P70699	Q3TPJ8	P58281	Q9CQC7
Q9Z1P8	Q64010	Q9DCH4	P62301
Q9Z1N5	A0A0R4J079	Q9CX86	Q3UW53
P45591	Q3UPH1	O55029	Q91ZJ5
Q921W7	E9QA15	Q9CR57	Q4FE56
P46664	O70435	Q99J27	F8WI14
A0A0A0MQF6	Q63918	Q9JKC8	Q9CQF0
Q8BX02	Q6GU68	O88685	Q9DCC4
P45376	P26645	A2AVR9	P83870
Q64433	Q8BP47	Q99JI6	P97770
P13020	Q9ET01	F6RPJ9	P46467
A0A0R4J093	E9PZF0	Q9CQ19	Q922V4
A0A1B0GS68	P60843	Q99MJ9	Q3V3R1
P21460	P10493	Q8R361	Q8BH97
G5E8D6	Q8BNY0	P51863	Q52KF7
Q00612	P70698	Q9D945	Q91VR7
P34884	A0A1B0GSG5	Q9ERE7	Q8BFR5
Q5EBP8	Q04857	Q09199	O88958
Q8CBR6	O88968	Q4VA53-2	P63242
A0A0A6YX26	Q3U2G2	E9PUG7	O35074
O88322	F8WIT2	P26883	Q9R0E2
E9QAT0	Q64727	A2AKI5	Q62095
Q9WVB4	Q04447	Q8JZU2	Q8VEH8
Q9D2R0	Q9JHJ0	Q8R317	Q9JJA4
Q60709	Q8BHN3	Q9WV95	A2AMC3
P57759	P97807	Q9CQC7	A0A087WQS2
Q07235	P07901	P62301	Q78HU3
F8WGL3	Q9CQV8	Q3UW53	Q8R050
P17742	Q61081	E9Q2A6	Q9JKF1
Q8R2G6	F8WIV2	Q91ZJ5	E9Q4Q2
Q9CPN9	Q7TPR4	Q4FE56	Q9CX56
Q06138	P52795	F8WI14	E9QKR0
Q9DBJ1	Q9WV55	Q9CQF0	Q8BMK4
A0A0A6YX18	O89079	Q9DCC4	Q8R086
P17427	A2AVJ7	Q6PHQ9	Q99M28
Q3V117	A0A494BA97	P83870	G8JL51
Q8BSH9	Q9QXS1-3	P46467	Q64441
A2AHD1	Q9Z1P8	Q922V4	Q91VR8
P70195	Q99KP6	Q3V3R1	Q9D1C8
P68510	Q9R1T2	Q8BH97	Q9EQS3
P46935	Q9Z1N5	P58058	Q6P5B5
P07141	Q61292	Q8BFR5	Q6P069
Q9CXW3	P17095-1	O88958	P29341
Q8VDD5	P45591	P63242	J3QNK8
P63028	P04104	O35074	P63005
O35593	Q921W7	Q9D289	Q9D6K9
P62259	P46664	A0A0J9YU82	O88569
A0A0R4J1E2	A0A0A0MQF6	Q9R0E2	Q8K1M3
A0A338P7H5	Q8BX02	Q62095	Q91VH2
Q64674	P45376	Q8VEH8	Q99KV1
P20152	Q64433	Q9JJA4	Q8C2Q8
P28667	A0A0R4J093	A0A087WQS2	Q9CQK7
Q642K5	P13020	Q78HU3	P21981
Q9JM58	P21460	Q8R050	Q6P5D8
P54227	G5E8D6	Q9JKF1	D3Z7P3
P97855	Q00612	Q9WUR2	Q8K2C9
P56391	P34884	Q9CX56	A0A0R4J0G4
P09055	Q5EBP8	E9QKR0	P45952
Q8BND5-3	P01942	Q8BMK4	Q9D1Q6
Q9R0Q1	A0A0A6YX26	Q8R086	Q99LI7
Q9D7S9	P11214	Q91YL3	P08121
A0A1Y7VJW9	Q9D0R8	Q811D0-2	Q9QYA2
P62137	O88322	Q99M28	Q8BML1
A0A0R4J0I9	Q9WVB4	G8JL51	Q80XI4
Q9CR57	Q9D883	Q91VR8	Q61035
O55029	Q8C0E2	Q9D1C8	Q62086
O70310	P57759	Q9EQS3	Q9DCA5
Q9D8B3	Q07235	A0A087WNZ7	Q923D4
O70251	F8WGL3	A0A0J9YUI1	A0A3B2WCD8
A2AVR9	P17742	Q6P5B5	P47955
F6RPJ9	Q8R2G6	Q8K0V4	Q9CPZ8
P60766	Q9CPN9	Q6P069	P60335
P47757-4	Q9DBJ1	P29341	Q9CQX8
Q9CQ19	P17427	P63005	Q2KN98
E9QNQ3	P60122	Q9D6K9	H3BJ52
Q3UZG4	Q3V117	O88569	P17047
Q9QZE7	Q8BSH9	Q91VH2	Q9DAM7
Q9R059	P70195	Q8K1M3	P26040
P31001	A2AHD1	Q99KV1	P01831
O54775	P68510	Q9D273	P56135
P26883	P46935	Q9CQK7	Q9DB20
F6TVP2	P07141	J3QNQ8	O08788-2
A0A171KXD3	Q9CXW3	P21981	P31786
A2A690	Q8VDD5	Q6P5D8	E9Q496
O70400	O35593	D3Z7P3	Q99MR8
Q03265	P63028	Q9CXK8	Q91V12-4
Q8BKG3	E9Q0F0	Q8K2C9	Q9DCG9
Q9QUI0	P62259	A0A0R4J0G4	Q07113
F8WHM5	Q8R2Y2	P45952	Q6ZPJ3
Q03366	A0A338P7H5	Q9D1Q6	F8WI30
P08226	A0A0R4J1E2	Q3UPF5-2	P61294
Q91YN9	Q64674	Q99LI7	Q9D187
Q91ZJ5	P20152	P08121	P54276
F8WI14	P28667	Q9QYA2	Q61191
Q02853	Q642K5	Q80XI4	O35900
Q8R1G6	Q9JM58	Q61035	Q91W50
A2A547	P97855	Q62086	Q9D8T7
P40124	P56391	Q9DCA5	Q6PDN3-3
P63268	Q99KI0	Q923D4	A0A0R4J088
Q8BH97	P35980	A0A3B2WCD8	G5E924
Q9WUM4	Q8BND5-3	P47955	Q9CWK8
Q9WUK2	P09055	Q9CPZ8	Q9CWS0
Q8VCQ8	Q9D7S9	Q3U898	Q3TLP8
B7ZCF1	Q9D1J3	Q9ERG2	Q8C4U3
Q61805	A0A1Y7VJW9	P60335	P63094
F8WH23	P62137	Q80W47	Q80YQ1
Q8BWY3	A0A0R4J0I9	Q9CQX8	Q9D0A3
P09103	Q9DCH4	Q2KN98	Q71FD7
A2RT60	O55029	E9PX70	G5E911
Q08761	Q9CR57	P17047	Q8C4C9
A0A1W2P788	O70310	Q9DAM7	P32507
Q9R0E2	Q9D8B3	P26040	Q9D892
Q9R001	O70251	P01831	O35604
H7BX38	P09535	P56135	Q9CQM9
P48678	Q7M6Y3	Q9DB20	Q9ESU7
Q91Z25	A0A1W2P7Q9	P31786	Q9CZN7
P98086	A6PW84	E9Q496	Z4YKQ9
A0A087WQS2	A2AVR9	Q99MR8	A0A3Q4EI12
Q8R050	F6RPJ9	Q91V12-4	Q9WUM3
Q8VI78	P60766	P04202	P68134
Q9JKF1	Q9CQ19	Q9DCG9	A2AMY5
P50543	E9QNQ3	Q07113	Q9D0B6
P08122	P47757-4	Q6ZPJ3	Q9D2G2
E9Q4Q2	Q3UZG4	F8WI30	Q9R1P3
Q8R1Q8	Q9R059	E9QKI5	Q61686
Q8BMK4	P32020	Q9ER71	Q8CAY6
Q9QUR7	P31001	P61294	Q5SYD0
P35564	A0A0N4SVS6	Q9D187	Q9D1A2
Q3U6K9	O70400	F6V431	Q8JZR0
Q3UPL0	Q03265	Q61191	Q3UJB0
P63038	Q8R317	O35900	Q9WUD1
P15532	Q8BKG3	Q91W50	Q8VDJ3
P10107	Q9QUI0	Q9D8T7	A0A0N4SV38
P51150	F8WHM5	Q6PDN3-3	P02802
P70275	Q03366	A0A0R4J088	Q9D7H3
P10126	P08226	G5E924	P63011
O88207	Q91ZJ5	Q9CWK8	P53994
Q9EQS3	P17095	Q9CWS0	Q80ZV0
Q91XV3	E9QPB2	Q3TLP8	P70444
Q6P5H2	F8WI14	P63094	Q9WTI7
Q8JZQ9	Q02853	Q80YQ1	Q9QYS9
P29341	Q62418	Q9D0A3	Q9R0P4
P63005	Q8R1G6	Q71FD7	P29758
Q9D8S4	A2A547	G5E911	P62743
Q9D031	Q3V3R1	Q8C4C9	Q91V55
O88569	P40124	Q9D892	O08997
Q8K1M3	Q9Z1Q9	O35604	Q9QXB9
Q99KV1	Q8BH97	A0A2I3BQE0	Q9WTL7
Q8BH64	P35831	Q9CQM9	Q60876
P21981	Q9WUM4	Q8BRB0	Q91ZW3
Q02053	Q9WUK2	Q9CZN7	P62307
Q5XJY5	Q8VCQ8	Q9WUM3	P62715
Q61554	Q61805	P68134	A0A498WGD8
Q9D1Q6	D3YTQ9	A2AMY5	Q7TSG2
P97946	F8WH23	P40336-2	P10639
Q5XJF6	Q8BWY3	D3Z636	Q99L27
P08121	P09103	Q9D0B6	Q62351
Q7TMM9	A2RT60	Q9D2G2	Q8CD76
P27612	Q08761	Q9R1P3	Q8R326
A0A338P786	Q9R0E2	Q61686	Q8BK72
Q61035	Q9R001	Q8CAY6	Q9ER00
P37804	H7BX38	Q5SYD0	Q6PGF5
Q01853	Q91Z25	Q9D1A2	Q8BIQ5
A0A3B2WCD8	P48678	Q8JZR0	A2TJV2
P15535	A0A087WQS2	Q3UJB0	Q9D0I9
P47955	Q8VI78	Q9WUD1	P97825
E9Q912	Q9JKF1	Q8VDJ3	Q6ZWY8
Q9R118	P50543	Q9D7H3	O35704
Q8BGQ7	P08122	P02802	Q61029
P28653	Q8BMK4	P63011	Q921F2
P60335	A2A513	P53994	P26450
Q9Z2U1	Q8R1Q8	P70444	P35979
P24369	Q9QUR7	Q99JB8	P10630
Q9CQE8	Q3U6K9	O54890	Q61206
A2AVA0	Q3UPL0	F7ADT6	Q80UK0
Q62148	P63038	P29758	Q3TCN2
Q61398	P15532	Q8BYL4	G5E8A0
Q9QUR6	E9Q1G8	P62892	Q61704
Q8CI94	A0A0J9YUL3	P62743	Q9Z0G0
Q00780	P10107	Q91V55	E9PUM4
P26040	P51150	Q61245-2	Q9DC61
H3BJ97	P10126	O08997	Q8BP71
B1B1A8	O88207	Q9QXB9	Q3UKC1
F8WIP8	Q91XV3	D6RH37	P10649
A0A0U1RNJ1	Q6P5H2	Q9WTL7	G3X8T3
P51432	Q8JZQ9	Q60876	E9PV58
Q60847-2	Q921D4	Q91ZW3	Q921L5
P42208	Q6P069	P62307	P62897
Q91V12-4	P29341	P62715	Q3UGS4
P61089	P63005	A0A498WGD8	E9Q6R7
Q8K124	Q9D8S4	Q7TSG2	B2M1R7
Q91XA2	V9GXM1	P10639	Q8BW00
Q8C253	Q9D031	Q99L27	Q9WTX5
O55234	O88569	Q61810-2	P62702
A0A0G2JGD2	Q9WU28	Q62351	Q9DAR7
Q9Z0L8	Q8BH64	Q8CD76	Q99KQ4
A0A5F8MPZ2	Q3TMX0	A0A140LIX0	Q6PGH1
P97333	Q8K4Z5	P61080	O54962
Q9Z1D1	P21981	Q9ER00	D3Z3N4
Q91VR5	Q02053	Q8JZX5	Q9DCW4
O88544	Q5XJY5	Q8BIQ5	Q9JJU8
Q00519	Q61554	A2TJV2	Q8BIJ6
G5E924	Q9D1Q6	Q8VE80	P35700
Q99PT1	P97946	E9PYB0	Q9WUH1
Q06890	P61759	Q9D0I9	Q8VEB4
Q8VE43	Q5XJF6	P97825	Q9WV54
Q9CWK8	P08121	Q6ZWY8	P62317
O08795	Q7TMM9	Q3U422	Q9DC70
P61982	P27612	Q9CZC8	Q8C166
Q9CWS0	E9QMW4	P70279	O08848
Q8VCF1	Q61035	Q61029	P05202
Q62446	P37804	Q921F2	A0A2R8VHL6
Q8C4U3	Q01853	P26450	Q9D820
O35295	P15535	P35979	Q8BTS4
Q80YQ1	A0A3B2WCD8	Q61206	Q9ESX5
Q71FD7	P47955	Q80UK0	Q7M739
E9Q638	Q9R118	Q3TCN2	Q8CGK3
Q8CFQ9	Q8VHM5	G5E8A0	Q9WTX2
Q60648	Q8BGQ7	Q61704	Q3U9G9
Q9CQM9	P28653	Q9Z0G0	P14115
P11276	P60335	E9PUM4	O09172
Q8BVQ9	Q9Z2U1	Q9DC61	Q80SZ7
A0A1L1SVK0	P24369	Q8BP71	Q9CQ62
Q9WUM3	Q9CQE8	A6H5Z3	Q6ZWQ9
Q9Z2X1	A2AVA0	P10649	Q9DBG9
P06869	Q9DBG5	G3X8T3	Q922F4
P08207	Q62148	Q60631	P01887
Q9R1P3	Q61398	Q921L5	P47877
H3BLJ9	E9QKZ2	P62897	A0A3Q4EHZ1
P33434	Q9QUR6	Q3UGS4	Q99J99
Q9D1A2	Q8CI94	E9Q6R7	Q9JLV5
Q8R180	Q00780	B2M1R7	Q69ZN7
P62267	P26040	Q8C7E7	P14824
Q9JMH6	H3BJ97	Q8BW00	G5E896
Q8VDJ3	A0A0U1RNJ1	F6Q750	Q9Z2I8
A0A0R4J0Z1	P51432	Q9WTX5	Q921C5
Q3UKW2	P42208	P62702	Q91YL2
Q61001	Q91V12-4	Q9DAR7	P97370
P14106	P61089	Q99KQ4	Q922W5
P02802	Q8C253	Q6PGH1	Q91YD9
O88844	O55234	O54962	Q3UPN1
A2BE93	A0A0G2JGD2	Q3UMU9	P11103
Q66JS6	P97333	Q9DCW4	Q60598
G5E8R1	Q9Z1D1	Q9JJU8	P17879
P09240	Q91VR5	Q8BIJ6	Q924M7
Q91YW3	O88544	Q6NVE8	Q8VHK9
O09159	Q00519	Q810J8	Q64669
E9PZP3	G5E924	Q9Z204-5	Q8QZY1
O35685	Q99PT1	P35700	Q91Z53
P29758	Q8VE43	Q8K1I7	P58021
Q6ZQ38	Q9CWK8	Q9WUH1	P32233
Q3UM45	O08795	Q9WV54	Q8K0C9
Q76MZ3	P61982	P62317	Q8R3M1
Q91V55	Q9CWS0	Q9DC70	Q60864
P52480-2	Q8VCF1	Q8C166	E9PVA8
Q61810	Q62446	O08848	Q8K4L3-3
O35598	Q8C4U3	P05202	G5E867
Q60876	O35295	Q9D820	Q99KJ8
E9Q1S3	Q80YQ1	Q8BTS4	P47911
A0A498WGD8	P11031	Q9ESX5	F6T2Z7
Q8VIJ6	Q8CFQ9	Q7M739	A0A0G2JGQ4
P63260	Q9CQM9	Q8CGK3	A2APB8
A0A0R4IZW8	P11276	Q9WTX2	Q3TUQ7
A0A0R4J0Q4	Q8BVQ9	Q68FL6	P52480
P13595	A0A1L1SVK0	Q3U9G9	P62889
Q62261	G3X9V0	P14115	P48428
Q99L45	Q9WUM3	O09172	Q91VJ2
Q62465	P14733	Q80SZ7	E9QMH7
P26039	Q9Z2X1	Q60960	F6XC54
Q9ERG0	P06869	Q9CQ62	Q9CZ30
Q9QUR8	P08207	Q6ZWQ9	D3Z0M9
Q99LX0	Q9R1P3	Q9DBG9	Q3TJ22
Q9ER00	P33434	D3YXB7	Q9WVQ5
Q61508	Q9CQ45	Q922F4	Q60737
P80314	Q9D1A2	P01887	Q78ZM0
A0A0A0MQ90	Q3UJB0	P47877	P32067
Q9QYR6	Q9JMH6	Q8R080	E9Q7G0
E9PWW5	Q8VDJ3	Q99J99	O55106
Q07797	A0A0R4J0Z1	Q60817	Q9CVB6
P47915	Q3UKW2	Q69ZN7	Q8BK64
Q8R4K8	Q61001	P14824	Q6PAM1
P97290	P14106	Q9Z2I8	D3Z0V7
Q91YR9	P02802	Q921C5	Q60605-2
Q9EQH3	Q99J77	Q8BWZ3-2	A0A0A0MQ80
P06797	O88844	Q91YL2	Q3U7R1
Q9QUM9	Q8VED5	P97370	Q61165
Q9JK53	A2BE93	Q3UUU2	E9PUC2
Q9D0I9	G5E8R1	Q922W5	Q9DAV6
P19137	Q66JS6	Q3UPN1	Q91XD7
O08807	P09240	Q91YD9	Q7TSI3
Q9D819	Q91YW3	Q60598	A2AMV1
P97315	Q8VHI5	A0A087WQE6	Q9Z0F7
P97825	O09159	P17879	Q99LD8
Q6ZWY8	O35685	Q924M7	Q61733
P24547	P29758	Q8VHK9	Q922Y1
P08249	Q6ZQ38	Q64669	Q7TT37
Q61233	Q3UM45	Q91Z53	Q60715
Q91V98	Q3UGB5	Q8QZY1	B1AT82
O08529	Q76MZ3	P58021	Q8BJY1
Q6IRU2	Q91V55	P32233	Q64337
Q99LB4	P52480-2	Q8K0C9	Q3UXS0
Q08879	O35598	Q8R3M1	Q99N94
P17182	A0A2I3BRL8	Q60864	O08804
O35887	Q60876	E9PVA8	Q3TW96
Q925B0	E9Q1S3	Q8R0I4	Q99KR7
P35979	A0A498WGD8	Q8K4L3-3	E9Q8A3
P70168	Q8VIJ6	G5E867	Q62356
P62855	Q80X50-2	Q99KJ8	Q9D6K8
Q64299	M0QWP1	P47911	Q9CQJ8
O09061	P63260	A0A0G2JGQ4	Q91VZ6
P63325	A0A0R4J0Q4	A2APB8	Q8VDC1
P08884	P62983	Q99KH2	Q9D1E6
P27773	P13595	Q3TUQ7	P35282
P58774-2	Q6XLQ8	P52480	P62830
Q62426	Q62261	P62889	Q8BMJ3
Q9CZX8	Q99L45	P48428	P97872
Q9Z0J0	Q62465	Q91VJ2	Q6NZD2
Q80UW0	P26039	E9QMH7	Q3UDC3
G3X8T3	P62141	P17439	Q8CCP0
Q8QZR4	Q9ERG0	D3Z0M9	P62746
P47754	Q9QUR8	Q9CZ30	A2ADY9
P46061	Q99LX0	Q3TC93	P62908
Q9DCT8	Q9ER00	Q3TJ22	Q3TBT3
P62897	Q61508	Q9WVQ5	A0A1B0GT92
A0A0A6YXU9	P80314	Q60737	P14685
P62702	Q9QYR6	Q78ZM0	Q61263
Q9CR51	A0A0A0MQ90	A0A286YCW8	P97351
O54962	Q07797	P32067	Q3UKN6
P47962	Q9JIF7	E9Q7G0	P58742
Q6ZWX6	P47915	O55106	Q9JM96
A2AE89	Q9CQF3	Q9CVB6	Q3U816
Q9DCC5	P97290	Q6PAM1	Q8CBY8-2
Q9R1P0	Q91YR9	Q8BK64	A0A0R4J263
Q8R3B1	Q9EQH3	Q60605-2	Q91YS7
Q63ZW6	Q5SW88	Q99P30	P62264
Q08879-2	P06797	Q3U7R1	Q5RKN9
A0A1B0GR11	P54775	Q60605	A0A0G2JEK2
P97297	Q9QUM9	Q61165	Q8K0C4
O35674	Q9JK53	Q9DAV6	P17918
P62320	Q9D0I9	Q91XD7	P55302
P58022	P19137	Q6PE80	A2ASW0
P27659	O08807	Q91VJ4	P62821
A2A7S7	Q9D819	Q7TSI3	Q8BJW6
O88273	F7CVJ5	Q9Z0F7	P62281
Q61598	P97315	Q8VCN5	A0A2C9F2D2
P32261	P97825	Q99LD8	Q9WVE8
Q9Z1Z0	P24547	Q922Y1	P63101
P35700	Q6ZWY8	Q61733	Q9R099
	Q08048	Q6P5E6	Q9QZM0
	P08249	Q60715	P50518
	Q04999	B1AT82	H3BJW3
	Q91V98	Q8BJY1	P49586
	Q921F2	Q3UXS0	Q9D824
	O08529	Q99N94	E9QAN4
	Q6IRU2	Q3U8Y1	Q9JHW2
	Q99LB4	O08804	Q3TML0
	Q08879	Q3TW96	Q9Z2N8
	O35887	Q99KR7	Q99JY9
	P17182	Q62356	G3UY42
	P35979	Q9D6K8	P23780
	P70168	Q9CQJ8	Q9Z1Z2
	P62855	Q91VZ6	Q9Z2U0
	Q64299	Q8VDC1	P59999
	O09061	Q9D1E6	Q9CQM5
	P27773	P35282	A0A1D5RLG3
	P58774-2	P62830	Q91VW3
	Q9CZX8	Q8BMJ3	Q8R016
	Q9Z0J0	P97872	Q8R317-2
	F8WJ41	Q8CCP0	P21550
	G3X8T3	P62746	Q6ZWZ6
	Q8QZR4	P62908	Q8BVU5
	P47754	Q3TBT3	A0A3B2WDB3
	P46061	A0A1B0GT92	Q91XI1
	Q9DCT8	P14685	Q8BHC9
	P62897	Q61263	P61979-2
	P12388	P97351	P62806
	P62702	Q3UKN6	P46938
	Q8R054	P58742	Q9CQS2
	O54962	Q3U816	Q01149
	P47962	Q8CBY8-2	Q9Z2X2
	Q6ZWX6	A0A0R4J263	Q9JLQ0
	A2AE89	Q91YS7	D3Z569
	Q9DCC5	P62264	P00493
	Q9R1P0	Q5RKN9	P60229
	O55135	A0A0G2JEK2	A0A494BAG2
	Q9JJU8	Q8K0C4	P21278
	Q9CX34	P17918	Q9CQF7
	Q63ZW6	P55302	E9PYF1
	Q08879-2	A2ASW0	Q6P8I4
	A0A1B0GR11	P62331	Q9Z1Q5
	O35674	P62821	P07607
	P62320	Q8BFY7	F8VPK0
	P58022	Q8BJW6	Q8VCL2
	A2A7S7	P62281	O70591
	O88273	A0A2C9F2D2	Q61655
	Q61598	Q9WVE8	Q91WK2
	P32261	P63101	Q62048
	P30412	Q9R099	Q9EQG9
	Q9Z1Z0	Q9QZM0	Q3TIV5
	P35700	P50518	Q6KAU7-2
		H3BJW3	P31750
		Q9D824	O54734
		E9QAN4	O54998
		Q9JHW2	Q8R4U7
		Q3TML0	G3UW85
		Q9Z2N8	P58871
		Q99JY9	Q99LD9
		P23780	P97298
		G3UY42	Q9EP69
		Q9Z1Z2	Q6GT24
		Q9JKB3	S4R2T5
		Q9Z2U0	Q9JHW9
		Q78RX3	Q3THK7
		P59999	Q9CPQ3
		Q9CQM5	Q8BVY0
		Q91VW3	P18406
		Q8R016	E9QLA5
		Q8R317-2	O55142
		Q8BTY8	Q61112
		P21550	E9PWY9
		Q6ZWZ6	Q6ZQH8
		Q8R238	Q8C129
		E0CXM9	O88851
		Q8BVU5	Q3UE37
		Q91XI1	A0A087WSP0
		Q61205	A0A0B4J1E4
		P62806	Q3TB82
		Q9CQS2	Q8JZQ2
		Q01149	P97346
		Q9Z2X2	Q9CWW6
		Q9JLQ0	Q8BSN6
		D3Z569	Q9Z1F9
		P00493	P48024
		P60229	O08759
		Q9D0B5	Q91YU8
		Q9CQF7	Q60931
		Q9Z2Z6	E9PUE1
		E9PYF1	Q8C788
		Q6P8I4	Q9DBR1
		Q9Z1Q5	Q8BL66
		F8VPK0	P48722
		Q8VCL2	Q99K28
		O70591	Q9D050
		Q91WK2	Q3UN10
		Q61655	Q8K212
		Q62048	Q14C51
		Q9EQG9	Q8VDP4
		Q3TIV5	Q91X78
		Q9CPN8	Q9EP97
		P31750	P57784
		Q6KAU7-2	P10518
		O54734	Q8VEE1
		Q6P6J9	E9QN31
		O54998	P70441
		Q8R4U7	Q3TQP6
		G3UW85	A0A286YD34
		P58871	A0A0J9YVF7
		Q99LD9	Q9EQQ2
		Q9EP69	Q3UHX2
		P97298	A0A0A6YXE5
		Q6GT24	Q8JZZ5
		Q62165	Q9CX00
		E9QJT2	A2AH25
		Q9JHW9	Q3TIX6
		Q3THK7	S4R225
		Q9QYR9	G3UXH4
		Q9CPQ3	Q3UE92
		Q8BVY0	Q9D1R9
		P18406	Q922H1
		E9QLA5	P70333
		O55142	Q9DCW5
		Q61112	Q8VBV7
		E9PWY9	P51855
		Q6ZQH8	Q9D0J8
		O70551	Q3TJD7
		Q8C129	A0A0J9YUZ4
		P97390	Q9R1P1
		O88851	Q91WT8
		Q3UE37	P56656
		A2ARI0	Q9DB25
		A0A0B4J1E4	P05622
		Q9EQQ9	A2AN08-3
		Q3TB82	Q8BLF1
		Q8JZQ2	A0A0R4J0W6
		Q3UD01	Q9D0T1
		P97346	Q920A5
		Q9CWW6	Q9Z1P6
		Q9JI13	P61161
		Q9Z1F9	Q9DBL1
		P48024	P09411
		A0A494B945	Q9CZG3
		Q8C788	Q60949-2
		Q91YM2	E9QAJ9
		Q8BL66	Q91V41
		P48722	Q6A028
		P57716	P26350
		Q99K28	Q148V7-3
		Q3UN10	O54774
		Q14C51	Q9WTQ5
		Q8VDP4	Q8BH40
		Q61074	Q9CZ13
		Q91X78	Q9QYH6
		Q9EP97	P07091
		P57784	Q9CQ92
		B1B1D8	Q9D1P0
		P10518	O08528
		Q9EQK5	Q9CW46
		Q8VEE1	Q8K2B3
		E9QN31	O35382
		P70441	Q99LC5
		Q9CY58	A0A2I3BQP6
		Q3TQP6	B1AXY5
		E9Q6X0	O88952
		F7C846	P14069
		A0A2I3BRW0	Q8BIG7
		A0A286YD34	M0QWS4
		Q9EQQ2	E9Q8I7
		G8JL74	E9Q616
		Q3UHX2	Q9CZW5
		Q8JZZ5	P36552
		Q9CX00	Q8C2Q3
		A2AH25	E9PYV1
		Q3TIX6	P11688
		Q3UE92	Q61937
		Q9D1R9	Q9JKR6
		Q922H1	Q00PI9
		P70333	Q91VD9
		Q9DCW5	E0CXT7
		P51855	Q9ER81
		Q8VBV7	Q9WVA4
		Q8K2Y7	Q3TXS7
		Q9D0J8	Q9CR61
		Q3TJD7	P62827
		A0A0J9YUZ4	Q6PB93
		Q9R1P1	P53996
		Q99JA5	Q60972
		Q91WT8	Q99K85
		Q9DB25	Q7TT50
		P05622	P62737
		Q7TMG8	Q99L04
		A2AN08-3	Q9Z2M7
		Q8BLF1	Q60865
		Q9D0T1	Q08093
		Q6Q899	O35215
		Q9Z1P6	A0JNY3
		Q920A5	Q8VDD8
		P61161	Q3TE40
		Q64378	Q9QYE6
		Q9DBL1	P22437
		Q6NSR8	Q80UF4
		P97377	Q99JB2
		Q8C0E3	P46460
		P09411	G3UZY2
		Q9CZG3	Q99JI4
		A0A087WQR6	Q60715-2
		Q60949-2	P37040
		Q91V41	E0CZE0
		E9QAJ9	Q91YI0
		Q6A028	Q8BH95
		P29416	Q3UPH1
		P26350	Q63918
		A0A0G2JGI1	P26645
		Q148V7-3	Q5SVG5
		O54774	Q8BWW3
		Q9WTQ5	Q9CQQ8
		Q8BH40	Q9ET01
		Q9CZ13	P17156
		Q9QYH6	P10493
		P07091	Q920L1
		E0CYV0	Q91YP2
		Q9CQ92	P83887
		Q9D1P0	Q9D104
		O08528	Q9CPX4
		Q8K2B3	F7C9N6
		A2A5R6	F8WHU9
		Q99LC5	Q9JHJ0
		Q99KU0	Q61879
		A0A2I3BQP6	Q9DC50
		O88952	P48758
		Q80WW9	Q9D7P6
		P14069	F8WIV2
		Q8BIG7	P52795
		E9Q8I7	E9Q3E2
		E9Q616	Q9JIG7
		Q9CZW5	Q8K183
		O35516-2	Q91XD2
		P36552	Q8BQM4
		Q8C2Q3	P52479
		P11688	A0A494BA97
		Q61937	P70699
		Q9JKR6	Q9D1M4
		Q00PI9	A0A1L1SRX2
		Q91VD9	A0A0R4J0K1
		O88746	G5E897
		Q9ER81	P45591
		Q3TXS7	P04104
		Q9WVA4	Q91VH6
		Q9CR61	P21126
		P62827	P35278
		Q6PB93	Q9CYH6
		P53996	P26187
		Q60972	Q8VDP3
		A0A0U1RNN0	Q64433
		Q99K85	Q62376
		Q8BHY2	P49935
		Q7TT50	Q5SQM0
		P62737	P63330
		Q99L04	Q9CQ49
		Q9Z2M7	O70305-2
		Q60865	Q9D0R8
		Q08093	Q8VHX6
		O35215	Q9WVB4
		A0JNY3	P30285
		Q8VDD8	Q9D883
		Q9QYE6	Q9DC23
		Q3TE40	G3UVU9
		P22437	Q9Z2I9
		Q80UF4	Q9D2R0
		Q99JB2	Q9D0B0
		P46460	Q923F1
		G3UZY2	Q543K9
		Q60715-2	Q8VE88
		Q99JI4	P17742
		P37040	Q9D8M4
		E9PUI5	Q9JMA1
		Q91YI0	K3W4Q9
		Q8BH95	Q9R190
		Q3UPH1	A0A0A6YX18
		Q63918	P17427
		P26645	B2RY56
		Q5SVG5	P53810
		Q8BWW3	Q925I1
		Q9CQQ8	O08919
		P17156	Q9R0X4
		P10493	Q8R105
		Q920L1	Q8R0A0
		Q91YP2	Q64674
		P83887	A0A0R4J107
		Q9D6T9	Q9QYJ3
		Q9D104	Q5F2E8
		Q08024	Q60902
		Q9CPX4	P28667
		Q9R0C0	Q9WUA2
		Q9JHJ0	P97822
		Q61879	O54984
		Q9DC50	Q9QXX4
		P48758	Q91YS8
		Q9D7P6	O08912
		Q8C0J2	Q9D8B3
		Q9CY97	Q6PE70
		O35943	P62996
		G5E8N7	G3UWH9
		F8WIV2	P60766
		P52795	Q3UKJ7
		E9Q3E2	Q8CCN6
		Q9JIG7	Q9D2M8
		A0A2I3BR78	D3YYT1
		Q8K183	Q3UZG4
		Q91XD2	Q8BFQ4
		Q8BQM4	A0A0N4SVS6
		P52479	P62900
		Q9D8T2	Q920E5
		A0A494BA97	Q03265
		P70699	Q9QXE7
		Q9D1M4	Q5SF07
		A0A3Q4EGK0	Q9CQB5
		A0A1L1SRX2	P62245
		A0A0R4J0K1	Q9Z1W9
		P62077	Q8C0D5
		G5E897	P63268
		P45591	Q9WUK2
		P04104	Q62419
		Q91VH6	Q62189
		P21126	D3Z4S3
		P35278	P05201
		Q9CYH6	A0A1B0GRA5
		P26187	F6Z4B2
		Q64433	Q9Z0E6
		Q8BGJ5	Q922Y0
		E9PYH2	D3Z2J5
		Q62376	Q8K0M3
		Q52KI8-2	Q8CG48
		F6QQP6	P50543
		Q5SQM0	Q3TDD9
		P63330	Q8BMJ2
		D3Z187	Q9Z204-2
		O70305-2	Q8R1Q8
		Q9D0R8	O35639
		Q8VHX6	O88532
		Q9WVB4	P47738
		P30285	Q9CRD0
		Q9D883	A0A0J9YUL3
		Q9DC23	D3Z5N6
		Q9Z2I9	P61222
		Q9D2R0	Q3THS6
		Q9JMG1	Q9ESP1
		Q9D0B0	Q8QZY9
		Q923F1	D0VYV6
		Q543K9	Q6GQT9
		Q8VE88	O55143
		P17742	Q68FE6
		Q9D8M4	B1AZI6
		Q9JMA1	Q8BUK6
		K3W4Q9	Q5XJF6
		Q9R190	P27612
		A0A0A6YX18	A0A494BBB0
		P17427	P0C605
		B2RY56	Q8K3H0
		P53810	A0A0R4J0Q6
		Q925I1	Q99KY4-2
		O08919	P34152
		Q9R0X4	Q9CQI7
		G3X9M0	Q8K3X4
		Q8R105	Q921T2-2
		Q8BVI4	P24369
		Q64674	E9PX48
		A0A0R4J107	Q80SW1
		Q9QYJ3	Q8CH18-3
		Q5F2E8	Q9D1J1
		P28667	Q9Z2I0
		Q9WUA2	P19253
		P97822	P26043
		Q62433	A2A9Z2
		O54984	Q8R332
		Q69ZS0-2	Q6PFB2
		P28867-2	P42208
		Q9QXX4	Q91VM5
		Q91YS8	P61089
		Q9D8B3	Q3U741
		Q6PE70	Q5F2E7
		P62996	Q91VR5
		Q8BZ36	A0A1B0GSX7
		Q3UKJ7	Q9JIK9
		P60766	O88544
		Q9D2M8	Q9JKS4
		Q3UZG4	O88543
		Q8BFQ4	Q9JII6
		H7BX14	Q8BGC0
		Q60902-2	Z4YJV4
		P62900	Q9DB73
		Q03265	Q62446
		Q920E5	P11031
		Q9QXE7	Q9DCR2
		Q9Z0H7	Q8CFQ9
		A0A0R4J150	Q3UGR5
		Q9QZS3	P21279
		G3X9Q0	P13439
		Q5SF07	P14733
		P62245	Q8BWT1
		Q9CQB5	A2AAN0
		Q9Z1W9	Q9Z2X1
		Q8C0D5	A0A3B2WCL5
		P63268	P61202
		Q9WUK2	B2RUE8
		Q62419	Q3TVI8
		Q62189	Q64521
		D3Z4S3	A2AJK8
		P05201	Q91Z49
		A0A1B0GRA5	A0A0R4IZY0
		Q9Z0E6	Q91YT0
		Q5I1X5	Q3TQN1
		Q9D7N6	P19783
		Q8CG48	Q99J36
		P50543	Q9JMH6
		Q8BMJ2	A0A494BA07
		Q8R1Q8	P63328
		Q9Z204-2	P61082
		O35639	P42227
		Q8CJ53	Q9ER41
		O88532	A2BE93
		P47738	Q922Q4
		Q9CRD0	Q8C5W3
		A0A0J9YUL3	Q91YT7
		D3Z5N6	B1B0C7
		P61222	A0A087WQS0
		Q3THS6	Q6P9Q6
		Q9ESP1	Q9CZE3
		Q8QZY9	Q9DBL9
		Q6GQT9	A0A2K6EDK3
		O55143	Q9D0M5
		Q68FE6	Q6ZQ38
		E9PYK3	Q3UM45
		B1AZI6	Q3UM18
		Q8BUK6	Q61584-3
		Q5XJF6	Q9CZU6
		A0A494BBB0	Q64514-2
		P27612	F8WJ93
		P0C605	Q8R0G9
		Q8K3H0	J3QQ16
		A0A0R4J0Q6	A2AE27
		Q99KY4-2	Q9CQ91
		Q8K3X4	Q8VIJ6
		Q921T2-2	Q8BGS2
		P24369	P97384
		G3UXK7	A0A338P6L5
		Q80SW1	Q8BYU6
		Q9D1J1	O35381
		Q9Z2I0	P28660-2
		P19253	Q9CY27
		Q8R574	Q9D281
		P26043	Q05816
		A2A9Z2	Q62465
		Q8R332	Q8QZS1
		Q6PFB2	Q8C167
		P42208	Q9ERG0
		Q91VM5	A0A0R4J1H6
		Q9ES97-5	A6H692
		P61089	Q7TNV0
		E9Q3W4	Q9R1Q7
		Q5F2E7	E9PVA2
		Q91VR5	O08547
		Q9JIK9	Q9QYR6
		O88544	Q9CY16
		Q8BU31	Q60790
		Q9JKS4	A0A0N4SUH8
		O88543	Q9CQF3
		Q9JII6	B1AVZ0
		Q8BGC0	P99028
		Q9D3N8	Q9QYC0
		Q91YE3	P97465
		Q9DB73	Q8K2D3
		P11404	P24547
		Q62446	G3XA17
		Q9DCR2	Q9CS42
		P11031	O08529
		Q3V1T4	F8VPX1
		Q8CFQ9	Q8CG70
		Q3UGR5	Q8CDJ8
		P21279	P27773
		Q91V89	P24472
		P13439	O35226-2
		P14733	Q9CQW9
		Q8BWT1	P58774-2
		A2AAN0	Q62426
		Q9Z2X1	F6XC25
		A0A3B2WCL5	Q9QYI3
		D3Z5J3	Q91VC3
		P61202	Q60668
		Q3TVI8	Q9D4H1
		Q3TYX3	P04117
		A0A0R4IZY0	P46061
		Q3TQN1	P28867
		P19783	Q8BHL8
		Q99J36	B1AU25
		Q3UMT1	P12388
		Q9JMH6	E9Q3G8
		A0A494BA07	Q9ET78
		Q9JIP6	Q8VBZ3
		P61082	B0R0S4
		P42227	O88967
		Q8BSH3	Q9CR51
		Q9ER41	Q60838
		A2BE93	Q922H9
		Q922Q4	Q6PGC1
		Q91YT7	Q9DCC5
		B1B0C7	Q3U367
		A0A087WQS0	Q3U957
		Q6P9Q6	Q9R1P0
		Q9CZE3	O55135
		A0A2K6EDK3	Q9CX34
		Q9DBL9	Q8BMS1
		Q9D0M5	Q78XF5
		Q6ZQ38	Q6R891
		Q3UM45	Q61598
		Q61584-3	Q99KD5
		Q9CZU6	E0CZD9
		Q64514-2	Q91V76
		Q8R0G9	Q9Z1Z0
		Q9CQ91	Q8BJ05
		Q8VIJ6	P62748
		Q8BGS2	Q6PB66
		P97384	Q3UHZ7
		Q9D0Y8	P52293
		Q8BYU6	A0A3Q4L2S1
		O35381	D3YYT0
		P28660-2	Q64449
		Q9CY27	Q9Z0H1
		Q9D281	P63085
		Q05816	P19096
		Q62465	Q9JK81
		A0A1W2P775	Q91ZR1
		Q8QZS1	P54823
		Q8C167	G5E8V9
		Q9ERG0	Q9DBZ5
		A6H692	P61211
		Q7TNV0	Q9CR86
		Q9R1Q7	Q4KMM3
		O08547	Q64191
		Q9QYR6	E9PYT3
		Q9CY16	P14869
		Q60790	P63168
		A0A0N4SUH8	Q99JZ4
		Q9CQF3	P11157
		B1AVZ0	Q3UFK8
		P99028	Q9CXW4
		E9Q3I8	A2AQU8
		Q3TN06	E9Q3N1
		P97465	Q6NV99
		E9PVX6-2	O70423
		Q8K2D3	Q8CJ40-2
		P24547	Q9ER72
		F6RJ39	D3Z456
		Q9CS42	Q8C845
		O08529	P59024
		F8VPX1	Q8BR92
		A0A498WGE8	Q9DB05
		Q8CG70	Q3ULG5
		Q8CDJ8	Q99LS3
		P27773	Q9D8W5
		Q5I012	Q8BH58
		Q3UCV8	E9Q6M7
		P24472	Q9D8N2
		O35226-2	B1AV77
		Q9CQW9	P53690
		P58774-2	Q99KH8
		Q62426	Q5SUD5
		Q9QYI3	Q9DBE9
		Q8CG71	Q9WVB0
		Q91VC3	Q9EST5
		Q60668	Q9EQH2
		Q9D4H1	P80318
		Q810A3	Q99LJ6
		P04117	F6YVP7
		A0A0G2JGY5	H3BKD4
		P46061	A0A2U3TZ82
		Q8BHL8	B7ZNL2
		Q7TMG7	Q9ERK4
		P12388	Q9DAW6
		E9Q3G8	Q9CX60
		Q9ET78	Q921J2
		Q8VBZ3	P19324
		Q8BU85	Q99K48
		B0R0S4	Z4YJT3
		O88967	P08030
		Q9CR51	Q9QXS1-13
		Q922H9	Q3TDN2
		Q6PGC1	Q6PE01
		Q3U367	Q3TN34
		Q9DCC5	P63321
		Q9R1P0	Q8R0F6
		O55135	Q5M8N0
		Q9CX34	O35286
		Q7TMQ7	Q6A0D4
		Q8BMS1	Q9CQZ5
		Q9D0S9	Q9QYJ0
		Q63739	Q9QZD9
		Q6R891	Q8BG95
		Q9CQ88	Q60932
		Q61598	Q9R0I7
		Q99KD5	P58801
		Q91V76	Q91YU7
		Q9Z1Z0	Q921X9
		Q8BJ05	Q9D023
		P62748	P0DOV2
		Q6PB66	Q8BG94
		Q3UHZ7	E9Q7M2
		P52293	Q9DBR0
		A0A3Q4L2S1	P25444
		D3YYT0	Q5SWP3
		S4R2J9	A2AIH8
		Q64449	E9PWG6
		Q9Z0H1	A0A0A0MQF5
		Q9CWL8	P62774
		P63085	Q8C7E9
		P19096	Q9CXF4
		Q9JK81	P43275
		Q91ZR1	P51881
		P54823	A0A0R4J047
		G5E8V9	Q91WV0
		P61211	A0A0R4J0D3
		Q9CR86	Q9Z1T1
		P51655	Q8CGC7
		A0A1D5RLW4	E9QKR1
		Q3THJ3	A0A087WR50
		Q6IRU5	P00375
		Q64191	Q99MR6
		E9PYT3	P50247
		P14869	A0A0R4J0T8
		P63168	P62754
		P11157	Q8BMA6
		Q3UFK8	Q03958
		Q9CXW4	Q9WVA2
		A2AQU8	Q924B0
		E9Q3N1	Q01320
		O09111	O88342
		Q9WVJ3	G3X8R0
		Q9ER72	Q9CQ75
		Q8BR90	Q9EPL8
		Q8C845	Q8BNU0
		P59024	Q8K2I1
		Q9D6S7	Q9Z0N1
		Q8BR92	G3UVU2
		Q9DB05	Q61024
		A0A498WGK6	Q3V038
		Q3ULG5	Q8R2M2
		Q99LS3	P35550
		Q9D8W5	Q9JJV2
		Q8BH58	Q9D8E6
		Q8BJZ4	Q9CQA3
		P62876	Q7TMY8-4
		B1AV77	Q9EPC1
		P53690	Q3TWV4
		Q99KH8	Q8BML9
		Q9QXS6	P70697
		Q9DBE9	E9PV22
		Q9WVB0	P52503
		Q9EST5	D3YZP9
		Z4YL78	Q6NXL1
		P80318	Q5PRF0
		Q60967	Q8K009
		Q99LJ6	Q3UDM0
		F6YVP7	P97494
		Q9DCC7	O09106
		H3BKD4	P55258
		A0A2U3TZ82	Q8BH43
		Q78PG9	Q8K1J6
		B7ZNL2	E9QNN1
		D6RHA2	P28658
		Q9DAW6	Q9CPW4
		Q9CX60	P62315
		Q921J2	Q3UMF0-4
		P19324	P54071
		Q99K48	P52825
		Z4YJT3	A0A1B0GRP7
		P08030	A2AWT7
		Q9QXS1-13	Q61576
		Q3TDN2	Q9CQH7
		A0A087WQI3	Q9CWQ0
		Q6PE01	E9Q6A9
		P12815	P58774
		P63321	P67984
		Q8R0F6	P99024
		Q5M8N0	Q62425
		O35286	Q8R4N0
		Q6A0D4	Q9D024
		Q9CQZ5	Q8BP43
		Q9QYJ0	Q8VI75
		Q64695	A0A3B2WCR6
		Q9QZD9	Q9D0E1
		Q60932	P12787
		Q9R0I7	P14873
		P58801	E9QK48
		P61922	Q8BTZ7
		Q921X9	O35682
		Q9D023	Q8CBY1
		P0DOV2	F8WIE5
		Q5SU48	Q9D6Z1
		Q9DBR0	Q5U458
		E9Q7M2	Q9D1D4
		P25444	Q64152
		Q5SWP3	Q62318
		A0A286YDT0	Q7TQI3
		A2AIH8	Q8VDM4
		A0A0A0MQF5	O35218
		P62774	Q99K70
		Q9CXF4	F7C9S8
		P43275	Q9CR00
		P51881	F2Z4A3
		Q91WV0	Q99JI1
		A0A1L1SSA3	D9J2Z9
		Q9Z1T1	Q8K298
		Q8CGC7	D3Z6H3
		E9QKR1	Q5SVT2
		A0A087WR50	Q6P8N8
		P00375	P80317
		P50247	Q8BFY9
		Q80YR5	Q9CQ48
		P16332	Q8K354
		A0A0R4J0T8	Q9CQN7
		P62754	Q9JJ28
		Q03958	F6ZX84
		Q924B0	Q9ERD7
		Q9WVA2	O88441
		Q01320	Q91Z50
		O89023	Q6PAV2-2
		Q8BGB5	P97314
		O88342	P14131
		G3X8R0	P24270
		Q811S7	Q542V3
		Q9CQ75	Q8BWL5
		Q9EPL8	P99027
		Q8BNU0	Q8BTS0
		Q9Z0N1	Q9JIH2
		G3UVU2	P45878
		Q61024	Q05186
		E9PXY1	P14148
		Q3V038	Q9CQR2
		Q8R2M2	D3YUP1
		P35550	Q8VIM9
		Q9JJV2	E9Q718
		Q9D8E6	A0A494BAJ6
		Q9CQA3	B1ASP2
		Q7TMY8-4	Q9CQD1
		F7CC56	Q8VCB1
		Q9JLM9	Q9D832
		Q9EPC1	Q78YZ6
		Q3TWV4	P29268
		Q8BML9	P62082
		P70697	P26516
		E9PV22	A0A338P7B7
		P52503	Q8BH04
		D3YZP9	Q9JKX4
		P50427	Q8BKZ9
		Q8CE50	Q99NB8
		Q6NXL1	Q7TSJ2
		O09012-2	Q9EQ06
		Q8BU88	G5E8L2
		Q3TCU5	H3BIW0
		Q8K009	E9Q0G1
		Q3UDM0	F6Y616
		A0A0R4J0P5	P83917
		Q9QXK3-4	Q9DBG7
		P97494	P41105
		O09106	Q8BJF9
		P55258	O35459
		Q8BH43	B9EJ54
		A0A0R4J242	Q8BGD9
		Q8K1J6	O35841
		E9QNN1	Q9DCT2
		P28658	E9PZ21
		Q9CPW4	Q8CIN4
		P62315	P62918
		Q8BM72	P21107-2
		P54071	A0A0G2JES3
		P52825	D3YTS4
		A0A1B0GRP7	A2A7A7
		A0A0R4J2B2	Q61768
		Q61576	P42669
		A0A1L1SRP4	P34022
		A0A1B0GSZ9	Q8VEH3
		Q9CQH7	Q9CYX7
		P58774	V9GXV0
		P67984	Q8R059
		H3BL08	Q9JJA2
		P99024	Q59J78
		Q8R4N0	A0A140LHU0
		Q9D024	P27046
		Q60716-2	Q99N87
		A0A0R4J000	Q9CQW1
		Q8BP43	A0A494BBF1
		A0A494BAG7	Q8CJG0
		Q8VI75	P63037
		P17183	G5E899
		A0A3B2WCR6	D3Z7P3-2
		H7BX95	Q9D2P4
		P12787	Q8BH79
		P14873	Q80U87
		P49070	Q6P5F9
		Q80U58-3	E9Q3U1
		Q8BTZ7	Q9R0P5
		F8WIE5	P16546-2
		Q9D6Z1	E9PUF7
		Q5U458	Q8R5C5
		Q9D1D4	P51480
		Q64152	Q9CR68
		Q62318	P41241
		Q9Z257	Q9CQ60
		Q7TQI3	Q6P549
		Q8VDM4	Q99KK7
		O35218	G3UXW9
		Q99K70	P18572-2
		Q9CZ28	A0A0J9YUQ8
		Q9CR00	Q91WK5
		F2Z4A3	P26231
		Q99JI1	Q99MN1
		D9J2Z9	Q9CU62
		Q8K298	Q08091
		Q5SVT2	A0A0R4J0H8
		Q6P9J9	Q9JJC6
		Q8C754	Q8CGY8
		Q6P8N8	Q5JC28
		P80317	Q9CQ65
		Q9CQ48	P11983
		Q8K354	Q8VCF0
		Q9JJZ4	Q9CQW2
		Q9JJ28	P48036
		Q9ERD7	H7BWX9
		Q91Z50	Q8R2K3
		P97314	Q9JIK5
		P14131	P62962
		P24270	Q6NZF1
		Q8BWL5	A0A0G2JEX1
		P99027	A0A0A6YXB7
		Q8BTS0	Q3TVK3
		Q9JIH2	P97450
		P45878	Q99L13
		Q05186	Q64010
		Q7TQH0-2	Q9DAK9
		P14148	Q91YQ5
		Q9CQR2	P60843
		D3YUP1	Q9CR26
		Q8VIM9	Q9D7M8
		E9Q718	Q3UMB9
		A0A494BAJ6	Q14B01
		B1ASP2	Q3U186
		Q9CQD1	O35465
		Q8VCB1	Q9EQI8
		Q31125	Q8CJ26
		Q9D832	Q8VE22
		Q78YZ6	G5E8T9
		P29268	A0A494BB18
		P62082	P28271
		P26516	Q04447
		P33174	Q9CPQ8
		A0A338P7B7	Q569Z6
		Q80Y17	O88676
		Q8BH04	P07901
		B1AU75	Q8CG76
		Q9JKX4	Q9DBE8
		Q99NB8	Q8BYA0
		Z4YN00	D6RFU9
		G5E8L2	Q61081
		Q924Z5	Q91VY9
		H3BIW0	Q7TPR4
		F6Y616	O89079
		P83917	Q9DBG6
		Q9DBG7	P28659-4
		P41105	P53395
		O35459	Q9CQZ1
		Q3ULD5	A0A087WQT6
		Q8BGD9	F6ZFU0
		O35841	P63147
		Q921M7	Q8BG05-2
		Q9DCT2	D3Z780
		E9PZ21	I1E4X1
		F6UND7	Q9QXS1-3
		Q8CIN4	P07742
		Q8C3X8	Q9Z1N5
		P62918	Q9D7M1
		Q8BML1-3	Q7TNC4
		P21107-2	Q6PF96
		A2A7A7	Q8VHL1
		Q61768	P13020
		P42669	A0A1D5RLY6
		P34022	O35298
		Q9CYX7	G5E8Y2
		V9GXV0	P34884
		D3Z7C0	P16254
		A0A087WPK3	Z4YKB8
		Q9JJA2	Q6NS46
		Q64310	Q60749
		P27046	Q9QX47-2
		Q99N87	O35857
		Q9CQW1	F8WI90
		A0A494BBF1	Q8C0E2
		Q8CJG0	Q9D6U8
		G5E899	Q9Z2L7
		P63037	Q8CIE6
		B1AZP2-3	Q3B7Z2
		P17426-2	Q9DCM0
		Q9QXD8	Q9D880
		D3Z7P3-2	A6PWC3
		Q8BH79	P18654
		Q80U87	P54103
		A0A2C9F2A2	P70195
		Q80XC2	P07141
		Q6P5F9	E9QNA7
		Q9CW79	G3X926
		P16546-2	P58404
		Q9R0P5	Q642K5
		P51480	P54227
		Q9CR68	P56391
		P41241	Q99LN9
		Q9CQ60	Q5U5M8
		Q6P549	Q99KI0
		Q99KK7	P35980
		P18572-2	D3YUV1
		A0A0J9YUQ8	Q8BYB9
		Q9CRB0	Q9D1J3
		Q91WK5	Q9CW03
		P26231	Q00422
		Q9CU62	Q3TKY6
		Q08091	O70310
		Q3TB04	Q9CYA0
		Q9JJC6	O70251
		Q5JC28	A0A0R4J0S1
		P11983	P47757-4
		Q9CQ65	P50428
		Q8VCF0	P32020
		P48036	Q8K3C3
		A0A1Y7VKT9	Q6A0A9
		Q9CQU5	P31001
		Q3UQN2	Q80W54
		Q8R2K3	O70400
		P55264-2	B2KGF0
		Q9JIK5	Q8BKG3
		P62962	E9QAE3
		Q3TVK3	Q8C181-2
		P97450	Q8R550-2
		Q3TIZ5	Q91YN9
		Q64010	A0A0B4J1E2
		Q99L13	Q9D338
		A0A3Q4EHN7	P27661
		Q9DAK9	Q00915
		Q91YQ5	P54116
		P48997	A2A547
		P60843	P40124
		Q9CR26	O70318
		Q9D7M8	Q8C878
		Q3UMB9	Q99KE1
		Q14B01	Q9QZL0
		O35465	O08599
		Q8BHZ0	P70445
		Q9EQI8	Q62159
		Q8CJ26	Q62448
		Q8VE22	F8WH23
		G5E8T9	Q8BWY3
		A0A494BB18	A0A0G2JDW7
		P28271	P09103
		Q04447	B1AUN2
		Q9CPQ8	A2AL50
		A0A3Q4EIC0	A0A1L1STY4
		P07901	A2ATI9
		Q8CG76	H9H9R4
		Q9JK48	B2RXW8
		Q8BYA0	Q4VA93
		D6RFU9	E9Q179
		Q6P1B9	Q8BU33
		Q61081	P43276
		Q91VY9	P62849
		Q7TPR4	P62071
		O89079	Q8K094
		P28659-4	Q9Z0P4
		Q9DBG6	Q6DFZ1
		P53395	P48774
		Q9CQZ1	Q8JZN5
		A0A087WQT6	P15532
		F6ZFU0	E9Q1G8
		P63147	P54822
		Q8BJS4	P10107
		Q8BG05-2	P51150
		I1E4X1	Q9D8L3
		Q9QXS1-3	Q05BC3
		P07742	P02469
		Q9Z1N5	Q91XV3
		Q7TNC4	Q6P5H2
		Q3UXG7	Q9CWF2
		E9QPI5	Q8JZQ9
		Q8VHL1	A0A3B2WBH9
		P13020	Q8CGC6
		A0A1D5RLY6	Q7TSV4
		P70452	Q9D8S4
		P34884	Q9D031
		P16254	P85094
		Z4YKB8	Q3TMX0
		P01942	Q8K4Z5
		Q6NS46	Q02053
		Q60749	P50544
		A2RSJ4	E0CYD2
		Q9QX47-2	P61759
		O35857	Q8R010
		F8WI90	Q7TMM9
		Q8C0E2	Q9D6J6
		Q3V3K3	Q6A068
		Q9D6U8	Q8BZW8
		Q9Z2L7	A7YY80
		Q8CIE6	Q05D44
		Q8BG81	P37804
		Q3B7Z2	E9QP00
		Q9DCM0	B8JK87
		Q9D880	Q01853
		A6PWC3	A2ADH1
		Q99LL5	Q9EPE9
		P54103	Q8VC70
		P70195	Q99JX7
		Q6P1H6-3	Q9Z2U1
		P07141	Q9WUK4
		E9QNA7	O08784
		O88325	Q3V3R4
		P97329	Q99N15
		P58404	E9QKZ2
		Q642K5	P55264
		P54227	Q8K2Q7
		P56391	Q60930
		Q99LN9	P54923
		Q5U5M8	Q80WQ2
		Q99KI0	Q9CQ43
		P35980	P51432
		D3YUV1	D3YU12
		Q8BYB9	E9PX56
		Q8VI86	Q8BSK8
		Q9D1J3	O88587
		Q9CW03	Q9DCS3
		Q00422	P11440
		Q3TKY6	O55234
		Q6PD26	Q9Z1D1
		O70310	Q3TMS1
		Q9CYA0	Q61216
		O70251	Q00519
		D3Z7B5	A0A0R4J275
		B9EJ80	Q9JMC3
		Q9CZ83	D3Z7X7
		P47757-4	O08795
		Q91XD6	P61982
		P50428	Q8BTI7
		P32020	P35762
		Q8K3C3	Q7TT15
		Q6A0A9	P0DOV1
		P31001	Q9DC16
		A0A0A6YY47	Q07417
		Q80W54	Q99K01
		O70400	G3UYZ1
		Q8BKG3	P98083
		Q9D1C1	Q9D172
		Q8C181-2	Q60648
		Q91YN9	Q8CCK0
		Q9D338	Q9D154
		P27661	H3BLJ9
		Q00915	Q99LH1
		P54116	Q9EQP2
		Q70FJ1-3	Q8BIW1
		A2A547	Q99LU0
		P40124	Q6ZWV7
		O70318	O09005
		Q8C878	P51949
		Q99KE1	D3Z6I4
		Q9QZL0	Q9Z199
		O08599	P20108
		Q62159	Q9D902
		P70445	Q8BFZ9
		F8WH23	A0A0R4J0Z1
		Q8BWY3	O88531
		A0A0G2JDW7	Q99J77
		P09103	O88844
		Q3V1V3	P43883
		B1AUN2	Q8BP92
		A2AL50	Q91YW3
		A0A1L1STY4	P68373
		H9H9R4	P29595
		B2RXW8	P70290
		Q8C5W3-2	P05132
		E9Q179	Q5F258
		Q8BU33	Q3UGB5
		P43276	Q76MZ3
		E9PX30	P52480-2
		B7ZCI3	Q99N96
		P62849	Q9CY50
		P62071	A0A2R8VI72
		Q8K094	A6X8Z5
		V9GXE6	Q9D554
		Q9Z0P4	P15306
		Q9CZH7	A0A494BB95
		Q6DFZ1	P62911
		Q8BR63	H7BX26
		Q8JZN5	Q6ZQL4
		P15532	E9Q3X0
		E9Q1G8	P62983
		P54822	Q9CYN2
		P10107	Q9DCT1
		P51150	Q6XLQ8
		Q9D8L3	Q62261
		Q9JIF0-2	Q8C3V4
		Q05BC3	E9PVC6
		P02469	Q08943
		Q91XV3	P26039
		Q9CWF2	P62141
		Q6P5H2	Q99LX0
		Q8JZQ9	Q8K1M6-3
		D3YVV1	O70503
		A0A3B2WBH9	A0A0A0MQ90
		P61079	Q3V1H1
		Q8VE99	Q91YR9
		Q8CGC6	Q9CRA5
		Q924T2	Q9QUM9
		Q7TSV4	P97315
		Q9D8S4	P08249
		Q9D031	Q8K1A6
		P85094	Q9DC33-2
		Q3TMX0	Q61233
		Q8K4Z5	B2RXS4
		Q02053	Q9D051
		P50544	Q99LB4
		P61759	Q80U35
		F6XCT0	O35887
		Q8R010	P17182
		Q7TMM9	P62855
		Q9D6J6	O54988-2
		Q6A068	Q3TPX4
		Q8BZW8	Q9DBZ1-2
		A7YY80	O09061
		Q05D44	Q9JHK4
		Q3UU96-2	Q8BJL1
		P37804	H3BKH9
		B8JK87	Q9DCX2
		Q01853	G5E895
		A2ADH1	Q61127
		G3UX44	F7D432
		Q9EPE9	Q9QXT0
		Q8VC70	Q64105
		Q99JX7	P47754
		Q9Z2U1	Q8BT07
		O08784	A8Y5P4
		E9PZD2	Q9R226
		Q3V3R4	Q99KR3
		Q99N15	P47962
		E9QKZ2	A2CG35
		P55264	Q9CPQ1
		Q9JHI7	Q91V61
		Q8K2Q7	Q99LC2
		Q60930	Q8R3N6
		Q8BTV2	Q9CYG7
		F8WIP8	P62320
		P54923	E9Q512
		Q80WQ2	P58022
		P51432	Q8BVF2
		D3YU12	P27659
		Q8BSK8	P30412
		O88587	P52432
		Q9DCS3	Q99JX4
		P11440	P83741-4
		O55234	A0A0R4J005
		Q8BM39	Q8BH69
		Q9Z1D1	Q8BTI8-3
		Q3TMS1	D3Z5I1
		Q61216	Q9D0Q7
		Q00519	O70475
		A0A0R4J275	Q9CRB9
		Q9JMC3	P63276
		Q5Y5T1	Q9CPP6
		O08795	Q9R0N0
		P61982	P43277
		P35762	D3Z4L9
		Q7TT15	Q9CRD2
		P0DOV1	P70349
		A2AWA9	Q5SSI6
[truncated: 842 more rows]

## Sheet: Venn analysis ND vs HFD
Common cellular proteins	Cellular proteins present only in ND	Cellular proteins present only in HFD	Common secretome proteins	Secretome proteins present only in ND	Secretome proteins present only in HFD
Q9JKB1	Q3U2K8	D3YX62	P62827	P32921	Q9CQI3
P49722	Q6ZQ06	A0A0U1RP87	Q922B2	Q5MJS3	A0A1Y7VJ48
Q8BJ05	P35585	Q99PV0	Q6PB93	P68254	A0A1C7CYV0
P62748	O88396	P37889	P49722	G5E8E1	Q3UHZ7
Q6PB66	S4R2J9	O54784	P09405	Q5SVG5	Q7M739
Q3UHZ7	Q9CWL8	E9Q0U7	P48036	Q9D0K2	P61979
P52293	Q6ZWZ2	Q3UZD0	Q3UQ28	P10148	P14115
P17751	P51655	Q9DBZ5	Q9WV54	Q9CPX4	Q3TPJ8
Q8BHB4	A0A140LJ29	A2ADR8	P62192	Q3UUU2	A0A0R4J079
Q9DCS9	A0A1D5RLW4	E9QMV2	P62737	Q91XH5	Q6GU68
Q78IK4	Q3THJ3	O54782	P62317	A0A0G2JGL0	P47941
Q9CQN1	Q6IRU5	Q4KMM3	P08113	P70699	P60670
Q9DB15	P82347	Q811D0-3	Q80YX1-2	E9Q0S6	Q8BP47
A0A3Q4L2S1	Q9JIG8	Q99JZ4	Q9D0F9	Q9DCL9	A0A0G2JH04
D3Z4U0	O09111	Q8R1X6	Q60865	P62889	E9Q0U7
Q9D7A8	Q7TMB8	Q8BYW9	Q9Z100	Q8BLX7	P54823
Q3TXV4	Q9WVJ3	Q6NV99	Q3UPI1	P53690	G5E8V9
P68254	A0A452J8A5	O70423	F8WJ99	A0A1B0GS68	Q8BNY0
D3YYT0	Q8BR90	Q8CJ40-2	Q08093	Q9QXS6	Q60710
Q64449	Q8R480	D3Z456	P14206	Q8CBR6	Q8BHN3
Q9Z0H1	Q9CQC5	Q69ZS0-3	P05202	E9QAT0	Q9CQM8
P63085	Q9D6S7	Q5SS83	P23116	F6YVP7	Q99KC8
Q9D7N9	A0A498WGK6	Q8K120	A0A0R4J0C9	Q9D2R0	P52795
P19096	E9Q798	F6QA74	O70475	Q60709	Q9WVJ3
P47941	Q8K4Q8	E9Q6M7	Q9CRB5	Q06138	P17879
Q91ZR1	Q3TE85	Q76N33	P63276	A0A0A6YX18	O89079
Q9JK81	Q8BJZ4	Q9D8N2	P17751	A0A0G2JEA5	Q8QZY1
P54823	P62876	Q5SUD5	P62962	Q8VCN5	A0A494BA97
P14602	Q9QXS6	Q62418-2	Q3TMX5	Q9DBG3	Q9QXS1-3
G5E8V9	Q8BI06	Q9EQH2	A0A0G2JEX1	P54227	Q99KP6
P61211	Z4YL78	Q9ERK4	Q8VHX6-2	Q8BVQ5	Q9R1T2
Q9CR86	Q60967	Q9CY58-2	A0A286YEB7	Q9R0Q1	Q61292
Q9D0K2	Q9DCC7	P62852	Q3TVK3	O08804	F6QA74
P62843	B0R091	Q3TN34	Q8C7E4	P61027	P17095-1
Q8C570	P47809	Q8BG95	Q8C483	Q9QZE7	P04104
Q9CR41	Q9JHW4	Q91YU7	P37889	Q8BMJ3	Q99KH8
A0A0R4J008	E9Q586	Q6PGL7-2	Q62219	O54775	Q9WVQ5
Q64191	Q78PG9	Q8BG94	A0A5F8MPN8	F6TVP2	Q9EST5
Q62347	Q91YJ3	E9PWG6	Q64010	P26883	P01942
Q922Q8	D6RHA2	Q8C7E9	Q64449	A0A171KXD3	A0A0A0MQM0
Q8CIV8	A0A087WQI3	A0A0R4J047	Q3UPH1	A2A690	P11214
E9PYT3	P12815	A0A0R4J0D3	Q63918	F7AA26	Q9D0R8
P14869	Q3TFP0	Q99MR6	O70435	O89023	Q9D883
P63168	P37889-2	Q3TQ27	E9QA15	Q91YN9	Q8C0E2
P11157	Q8CH25-2	E9QMB7	O09172	P63268	Q99K48
Q9DBF1	Q64695	I1E4X5	P26645	B7ZCF1	P60122
Q60710	Q8BWW9-3	Q8BMA6	Q9R0E1	P55302	Q99LD8
Q6P5E4	P61922	E9Q9Q2	Q9ET01	A0A1W2P788	Q3TTY5
Q6GSS7	Q9D6X6	A0A494BB03	E9PZF0	Q9CZ44	Q60715
Q3UFK8	Q5SU48	P17426	P14602	P98086	E9Q0F0
Q9CXW4	Q02819	Q8K2I1	P60843	Q8R050	Q8R2Y2
A2AU62	A0A286YDT0	Q05CL8	Q792Z1	P55288	A0A1L1SUX8
Q9CQM8	P10833	Q91YT8	Q6ZWQ9	E9Q4Q2	Q99KI0
Q9Z1Y4	A0A1L1SSA3	Q91XB0	P10493	P35564	P70202
A2AQU8	A0A0J9YVC1	Q9WTU6	Q9CR86	P70275	P35980
Q99KC8	P16332	Q5PRF0	P51655	Q9EQS3	P10711
Q8BPB5	Q80YR5	Q8VBX6-2	Q640N1	Q8BH43	Q9D1J3
Q8R3F5	Q8BGB5	Q3UMF0-4	P70698	Q5NCU4	Q9DCH4
E9Q3N1	O89023	Q3TCD4	Q6IRU5	Q6ZWZ6	Q3U1J4
D3YU17	Q811S7	A2AWT7	E9QN70	Q80YX1	P09535
Q9CZU3	Q9ET26	Q6ZPU9	A0A1B0GSG5	Q9JME2	Q7M6Y3
Q62523	E9PXY1	Q8C5G6	Q922F4	Q8K1M3	Q4VAA2
Q9ER72	Q6ZWQ7	Q9CWQ0	Q04857	Q99KV1	A0A1W2P7Q9
E9PWE8	A2A9I0	E9Q6A9	P01887	A0A338P786	A6PW84
O35344	F7CC56	A0A0N4SUH4	O88968	O35188	Q5SUS9
Q8C845	Q8K021	B1AT92	P47877	E9Q912	P32020
P59024	Q9JLM9	Q62425	F8WIT2	P47963	A0A0N4SVS6
Q8BR92	Q4VBE8	Q8C156	Q3U2G2	Q6ZWQ5	Q8R317
V9GXJ1	P50427	Q9D0E1	Q64727	B1B1A8	A0A0R4J0N0
O88520	Q6PDI5	E9QK48	P14869	F8WIP8	P17095
Q9DB05	Q8CE50	O35682	P12032	Q561M1	E9QPB2
S4R2A9	O09012-2	Q8CBY1	Q04447	Q60847-2	Q923D2
Q9D0R2	Q8BU88	Q922I7	Q9JHJ0	Q925I7	Q62418
Q3ULG5	Q3TCU5	Q8BHG9	P97807	Q8K124	Q3V3R1
P35505	P35293	E9QJT5	P07901	A0A1W2P6P1	Q9Z1Q9
Q9QUH0	A0A0R4J0P5	F7C9S8	P68369	Q91XA2	P35831
Q8CIB5	Q9QXK3-4	F7CHD9	Q9CXW4	Q9Z0L8	D3YTQ9
Q3UMA3	Q8VCP8	Q9DB27	Q9CWJ9	A0A5F8MPZ2	Q6PDL0
Q99LS3	Q3SXD3	Q9Z160	A2BE45	P18406	P60867
Q9D8W5	A0A0R4J242	D3Z6H3	Q8BPB5	Q8BFR4	G3X9V2
Q8BH58	O54950	A0A1B0GT81	Q9CQV8	Q02105	Q8K310
Q9DCL9	E9Q1J7	G3UYV7	P24527	E9PWY9	A2A513
P47758	Q9Z0R9	Q8BFY9	Q61081	Q06890	E9Q1G8
Q9CPV4	Q8BM72	Q9CQN7	Q61753	P19788	A0A0J9YUL3
B1AV77	A0A1W2P7K6	F6ZX84	Q3UPN1	E9Q638	Q921D4
P53690	A0A0R4J2B2	O88441	Q60598	Q71FD7	Q6P069
Q99KH8	A0A1L1SRP4	Q6PAV2-2	F8WIV2	Q60648	V9GXM1
Q3UGN9	A0A1B0GSZ9	Q9CRA8	Q7TPR4	E9Q043	Q9WU28
Q9DBE9	G5E8R3	Q9D091	P07724	H3BLJ9	Q3TMX0
Q6ZWZ4	Q9D0E1-2	P84104	Q9WV55	Q8BL66	Q8K4Z5
Q9WVB0	Q99LG2	Q76LS9	Q3UZ39	P50516	Q921V5
Q9D967	H3BL08	Q542V3	Q62523	Q8R180	P61759
Q9EST5	A0A286YCQ5	Q80Y20	E9PWE8	P62267	Q8R550-3
G3X9Q6	Z4YKT6	A0A0R4J218	A2AVJ7	Q922W6	E9QMW4
Q9CQL7	Q60716-2	Q9WUP7-2	Q9Z175	P26516	Q91V88
P80313	A0A0R4J000	Q8BKZ9	O35344	E9PZP3	Q8VHM5
P80318	A0A494BAG7	Q7TSJ2	Q64669	Q3TQP6	Q9CQF7
Q78JW9	P17183	Q9EQ06	Q8C845	Q61810	P30416
Q99LJ6	Q9DBL7	E9Q0G1	Q9R045	Q9Z204	H7BX95
F6YVP7	H7BX95	Q8BJF9	Q60864	A0A0R4IZW8	Q9DBG5
P61021	Q9JLB0	B9EJ54	Q9D0R2	E9PWW5	E9QKZ2
H3BKD4	P49070	F6RNF9	Q9Z1P8	Q8R4K8	Q8CHP8
P42932	Q80U58-3	G5E870	Q9Z1N5	Q61233	Q91WK2
A0A2U3TZ82	Q9CPS7	D3YTS4	Q99KJ8	Q8R4G6	Q8BTZ7
Q8BFW7	Q9Z257	A0A0G2JES3	P47911	Q925B0	O08583
B7ZNL2	Q9CZ28	Q8VEH3	Q8CIB5	Q99LP6	Q7TQG5
Q9DAW6	Q8VE11-2	Q3UPE3	P45591	Q8BH80	P50396
Q9CX60	Q8C754	Q8R059	Q9D8X2	P63325	O54941
Q921J2	Q6P9J9	Q59J78	Q9D8W5	P08884	Q02788
Q9JM76	Q9JJZ4	A0A140LHU0	Q921W7	Q62426	Q9DB27
Q99K48	Q7TQH0-2	A0A338P7E3	P52480	Q80UW0	Q8BK67
P19324	Q8CJ69	E9QNH6	Q3U4W8	P47878	P30681
P08030	Q31125	A0A1D5RLZ3	P46664	A0A0A6YXU9	P11031
Z4YJT3	P21956	B7ZCI2	P56480	Q59J91	P28474
Q9QXS1-13	H9H9T1	Q9D2P4	Q8BX02	Q9CR51	G3X9V0
Q9CQ10	Q3U0V2	E9Q3U1	A0A0A0MQF6	Q8R3B1	Q9Z1F9
Q3TDN2	P33174	E9PUF7	P45376	P11688	G3UYV7
Q9D6Y7	Q80Y17	Q8R5C5	Q9CYN9	P97297	P14733
O35143	B1AU75	G3UXW9	Q8BND5	P27659	Q8K354
Q6PE01	D3Z080	Q6IFZ6	Q64433	P10404	F8WHL2
Q9WUM5	Z4YN00	Q99MN1	E9PYI8	Q3TXS7	G3XA35
Q03963	Q924Z5	A2API8	A0A0R4J093	P31938	Q9CQ45
A0A0J9YUR2	A2AEM2	F8WHY8	P13020		A0A2I3BQZ9
Q8R0F6	E9PWX8	A0A0R4J0H8	Q9CZ30		A0A3Q4EGK3
P63321	Q8BZX4	Q8CGY8	P21460		F8VPK5
Q5M8N0	Q3ULD5	A0A384DV79	G5E8D6		Q3UJB0
Q9JL35	Z4YKM2	Q8R3X6	Q00612		P24270
Q6A0D4	Q921M7	Q9CQW2	P34884		B7ZCL8
O35286	F6UND7	H7BWX9	Q78ZM0		Q8BTS0
Q9CQZ5	P97496-2	A2AEY2	Q5EBP8		Q99J77
Q6P542	Q8C3X8	P97310	A0A0A6YX26		Q8VED5
Q8CAP3	Q8BML1-3	Q6NZF1	Q9CVB6		P35385
P09671	Q91W39	A0A0G2JEX1	O88322		Q8VHI5
P58059	Q8CDM8	A0A0A6YXB7	P43028		Q9CY58
P62814	D3Z7C0	G5E8E1	Q8BK64		Q9CXY6
Q9QYJ0	A0A087WPK3	Q3TPE9	P80313		Q3UGB5
Q61171	Q91WG2	Q3U186	P51859		F6XJP7
Q9QZD9	Q64310	A1L3S7	Q9WVB4		A0A2I3BRL8
Q8BU30	A8Y5N8	B1AQZ0	P80318		Q9Z1A1
J3QJX3	Q9CZT5	O88676	Q99LJ6		A0A0R4J097
Q9DBG3	Q61838	Q569Z6	Q3U7R1		Q80X50-2
Q60932	A0A286YDA2	Q9DBE8	P11152		M0QWP1
Q9R0I7	B1AZP2-3	Q6A058	P57759		P62983
P58801	Q68FD5	Q9D786	Q07235		Q6XLQ8
Q9JHU4	Q9QXD8	Q99L47	F8WGL3		Q3TDP9
P10711	P17426-2	D3YWD1	A0A0R4J0G6		E9QPE7
Q921H8	O55239	D3Z780	P42932		O35841
Q8BVQ5	A0A2C9F2A2	E0CXC7	Q8BFW7		P62141
P0DOV2	Q80XC2	Q9D7M1	P17742		Q8VBV7
Q9D023	Q9CW79	Q99JF5	B7ZNL2		Q9D0J8
Q921X9	E9PUN3	Q6PF96	Q8R2G6		Q9JIF7
P97765	Q62448-2	O35298	Q9DAV6		Q9CQF3
Q3U1J4	A2AQR0	G5E8Y2	Q9CPN9		Q5SW88
E9Q7M2	Q9CRB0	F7ACR9	Q8CG16		P54775
Q9DBR0	D3YWJ4	F8VQK5	Q9JM76		Q99NB9
Q6P1F6	A2ABY3	B2ZAC8	P19324		F7CVJ5
Q5SWP3	Q3TB04	O55201	Q9DBJ1		Q08048
P25444	Q99L48	P18654	P17427		Q04999
Q8C3W1	E9PUB0	G3X926	P40142		Q5SX75
A2AIH8	E9PX94	E9Q0A7	P08905		Q921F2
P61961	Q3UVP0	Q7M6Y3	P01027		P50608
A0A0A0MQF5	Q9CQU5	P59708	Q3V117		O54774
P62774	A0A1Y7VKT9	A0A0R4J0S1	P70195		Q6AXB7
Q9CXF4	Q3UQN2	E9QQ10	A2AHD1		E9Q827
Q8K4L0	P05784	Q8K224	Q8BSH9		F8WJ41
Q8VHI3	Q80YX1-2	D3YTR5	P68510		Q8K2B3
P43275	P55264-2	B2KGF0	P07141		P62196
P51881	A0A494BBL8	A0A571BGG1	P46935		P12388
Q923D5	S4R1P5	E9QAE3	Q9CXW3		Q6IFZ6
Q8JZM7	Q3TIZ5	Q8R550-2	Q8VDD5		Q8R054
Q8BMF4	Q8K2T8	A0A0B4J1E2	O35593		Q9JJU8
E9Q634	A0A3Q4EHN7	P97770	P63028		O55135
Q91WV0	A0A140LHA2	Q52KF7	P62259		Q9CX34
A0A0A6YVU8	P48997	Q91VR7	P37889-2		P30412
Q9Z1T1	Q8WTY4	Q62448	P62814
P56812	Q9JM51	A2ATI9	A0A338P7H5
Q8CGC7	Q8BHZ0	A2AMC3	A0A0R4J1E2
E9QKR1	Q3UHJ0-2	Q4VA93	Q64674
A0A087WR50	Q80U95	E9Q4Q2	Q61171
P00375	P84244	P48774	Q9QZD9
D3Z3E8	A0A3Q4EIC0	Q64441	P20152
Q9CZR8	L7N451	J3QNK8	Q642K5
Q60692	Q9JK48	Q8C2Q8	P28667
A2AEX8	Q811U4	E0CYD2	Q9JM58
P50247	P03995	Q8BML1	P56391
A0A0R4J0T8	Q6P1B9	E9QP00	P97855
Q8BMD8	Q9CQV4	Q9WUK4	Q9JHU4
P62754	A2ATL1	H3BJ52	Q8BND5-3
Q03958	Q8BJS4	Q9CQ43	P09055
Q9WVA2	Q9JHS3	O08788-2	Q9ET54-6
Q924B0	B8JK39	E9PX56	Q9D7S9
Q01320	Q3UXG7	P54276	A0A1Y7VJW9
Q80V26	E9QPI5	D3Z7X7	Q9D6X6
O88342	Q9R112	Q8BTI7	P62137
Q9CXT8	E9Q3P9	Q9DC16	A0A0R4J0I9
G3X8R0	Q8CFV9	Q8C4U3	Q11011
Q9CQ75	P49710	G3UYZ1	O55029
Q9EPL8	P70452	Q99K01	Q9CR57
Q6NSP9	Q9JMD0	P32507	Q6P1F6
Q8BNU0	P01942	Q9ESU7	Q3TW96
G3UVU2	A2RSJ4	Z4YKQ9	Q02819
Q9Z0N1	Q9DCZ4	A0A3Q4EI12	O70310
Q923D2	Q3V3K3	Q99LH1	Q9D8B3
P56375	Q8BG81	D3Z6I4	P25444
Q61024	Q8VC85	Q9Z199	O70251
P97379	Q8R2G6	A0A0N4SV38	Q8C3W1
G5E850	Q99LL5	Q80ZV0	Q62356
Q3V038	Q61578	Q9WTI7	A2AVR9
P57780	Q6P1H6-3	Q9QYS9	P62774
Q8R2M2	O88325	Q9R0P4	P38647
P35550	E9Q1T9	Q5F258	P60766
Q9JJV2	P97329	A0A2R8VI72	F6RPJ9
P51163	Q80UM7	A6X8Z5	P02463
Q6PDL0	Q8VI86	Q6ZQL4	E9QNQ3
Q9D8E6	P58281	E9Q3X0	Q9CQ19
Q7TMY8-4	Q6PD26	Q9DCT1	P47757-4
Q9CQA3	Q99J27	Q8C3V4	P47879
Q9CQ69	Q9JKC8	Q08943	Q3UZG4
P45377	D3Z7B5	Q8R326	H7BX99
P23927	B9EJ80	Q8BK72	P62830
Q69Z38	Q9CZ83	Q6PGF5	Q9R059
Q921K8	Q91XD6	O35704	P56812
P20029	Q09199	Q9DC33-2	Q80X90
Q61881	A0A0A6YY47	Q8K1A6	E9Q8I0
Q9CQQ7	Q4VA53-2	P10630	Q8CGC7
Q9EPC1	Q8JZU2	Q3TPX4	P31001
Q3TWV4	Q9D1C1	H3BKH9	P62908
P97823	E9Q2A6	G5E895	A0A087WR50
P20065	Q6PHQ9	Q3UKC1	O08553
Q8BML9	Q70FJ1-3	F7D432	Q60692
Q8QZT1	P58058	E9PV58	O70400
P70697	Q3V1V3	A2CG35	P50247
E9PV22	Q9D289	D3Z3N4	Q03265
Q9D5V6	A0A0J9YU82	P52432	P70460
P52503	Q8C5W3-2	Q8VEB4	Q8BKG3
D3YZP9	E9PX30	D3Z5I1	P62754
Q6NXL1	B7ZCI3	A0A2R8VHL6	Q9QUI0
Q91VC7	Q9WUR2	Q544X6	F8WHM5
Q8BU14	V9GXE6	D3Z5Y5	P97351
Q9QYB1	Q9CZH7	Q640N1	Q03366
Q8K009	Q91YL3	Q3UHJ0	P08226
Q3UDM0	Q811D0-2	A0A3Q4EHZ1	P17426
Q8BXZ1	Q8BR63	Q9JLV5	Q64514
P63017	Q9JIF0-2	G5E896	O88342
P97494	A0A087WNZ7	Q91VL0	Q91ZJ5
P55258	D3YVV1	Q9CPR1	F8WI14
O09106	A0A0J9YUI1	P11103	Q9EPL8
Q8BH43	P61079	A0A2I3BR81	Q6NSP9
O54833	Q8VE99	F6T2Z7	Q9Z0N1
Q3TZZ7	Q8K0V4	P70451	Q02853
Q8K1J6	Q924T2	F6XC54	Q61024
G3UX35	Q9D273	Q80UW8	Q8R1G6
P28658	J3QNQ8	Q6GV12	P97379
E9QNN1	Q9CXK8	D3Z645	A2A547
Q5SQ20	Q3UPF5-2	D3Z0V7	P62264
Q9CPP0	F6XCT0	A0A0A0MQ80	P40124
Q9CPW4	Q3UU96-2	E9PUC2	Q8BH97
P62315	G3UX44	A2AMV1	Q9WUK2
Q99KF1	Q3U898	Q7TT37	Q9WUM4
Q61696	Q9ERG2	Q9ES97	P57780
P54071	Q80W47	Q64337	Q8VCQ8
P52825	E9PZD2	Q810A7	Q5RKN9
A0A1B0GRP7	E9PX70	A0A1B0GRU3	A0A0G2JEK2
Q61576	Q9JHI7	P12265	Q61805
Q9CQH7	Q8BTV2	Q9Z1B5	A0A0R4J086
Q9QZE5	F8WIP8	E9Q8A3	F8WH23
Q61425	P04202	E9QP49	Q8BWY3
P58774	E9QKI5	Q3U487	A0A5F8MPE1
Q8CHT0	Q8BM39	Q6NZD2	P09103
F8WID5	Q9ER71	Q3UDC3	Q9D8E6
P67984	F6V431	A2ADY9	A2RT60
P99024	Q5Y5T1	Q3UI84	Q8BV57
Q8BI84	A2AWA9	D3YX27	P20060
Q9CQU0	Q9CY57	E9Q892	Q08761
D3YZ62	A0A2I3BQE0	F7ADQ2	P23927
B2RPU8	Q810A7-2	Q9JM96	Q9R0E2
Q8BK30	G3X8R5	B9EHJ3	P20029
Q8R4N0	Q8BRB0	Q80VJ3	Q9R001
Q8C2Q7	P40336-2	Q8R5H1	P62281
A0A498WGK2	D3Z636	P49586	Q8BJW6
Q9D024	F8WGD9	A0A1D5RLG3	P27546
Q9QZB7	Q9D7N3	A0A3B2WDB3	Q9WVE8
Q8BP43	Q99JB8	Q8BHC9	H7BX38
Q64737	O54890	P61979-2	Q9EPC1
Q8VI75	O09159	P46938	P63101
O55091	F7ADT6	F6R6F1	Q91Z25
G3X8Y3	Q8BYL4	A0A494BAG2	P48678
A0A3B2WCR6	P62892	A0A0R4J0M9	A0A087WQS2
O35127	Q61245-2	P21278	P20065
P54728	S4R2D3	Q9D115	Q8VI78
P12787	D6RH37	P07607	Q9JKF1
P14873	Q61810-2	G3X914	P50543
Q8CHP8	Q8R3V5	S4R2T5	Q9QZM0
Q8VEK3	A0A140LIX0	G3UYE7	P08122
Q9R1P4	A0A571BGD8	A0A087WSP0	Q8BMK4
Q6NZB0	P61080	Q8BSN6	Q8R1Q8
Q8BTZ7	Q9CRC0	O08759	Q9QUR7
O08583	Q8JZX5	Q91YU8	Q6NXL1
Q3V1A4	Q07797	Q60931	Q3U6K9
Q9Z0S1	Q62384	Q9DBR1	Q3UPL0
F8WIE5	Q8VE80	E9PUE1	P63038
Q80XR5	E9PYB0	Q9D7S7	G3UYX7
Q9D6Z1	Q3U422	Q9D050	P15532
Q5U458	Q9CZC8	Q8K212	Q9QYB1
Q64152	P70279	O35379	Q3TML0
Q9D1D4	Q80UP8	Q8R2L5	P10107
Q62318	Q3V3Y9	A2AH85	P51150
Q6ZQM8	Q61160	A0A0J9YVF7	P70372
P50396	S4R2U9	Q9D937	Q9D8N0
O09131	Q810V0	A0A0A6YXE5	Q99JY9
A0A338P769	Q9R1J0	H7BX23	Q3UDM0
Q99JR1	A0A3B2WBE1	S4R225	P80316
E9QJW0	A6H5Z3	G3UXH4	Q9Z1Z2
Q7TQI3	Q9WTX8	D3Z6A4	P63017
Q8VDM4	Q60631	Q9D0R4	Q9Z2U0
O35218	A0A0A6YXU9	Q9ET54-4	P10126
Q99K70	Q8C7E7	Q8BGT7	O88207
P15066	F6Q750	P56656	Q91XV3
Q9CR00	E9QP99	A0A0R4J0W6	P59999
F2Z4A3	Q3UMU9	A2AJY2	Q6P5H2
Q8BK67	Q91WN1	Q9ERF3	Q9CQM5
Q8BFQ8	Q6NVE8	E9Q827	Q8CI51
Q99JI1	A0A0R4J044	O35405	Q8JZQ9
Q91VK1	Q810J8	H3BKT0	P28301
D9J2Z9	Q9Z204-5	Q9D1D6	Q9QZF2
Q8K298	P47713	Q9CW46	P07356
P30681	Q6PI63	O35382	Q9CZD3
P18155	P32261	Q8VDM6	Q8BP67
Q9D1M7	E9QNH7	Q99LM2	Q9CPW4
Q9DB77	Q8K1I7	B1AXY5	P29341
Q5SVT2	Q9D8S5	M0QWS4	P62315
Q9WTP7	A0A494BA91	S4R1M2	Q9D8S4
Q6P8N8	Q68FL6	E9PYV1	P63005
G3UXZ5	Q9D4H8	Q8R2U4	O88569
P62488	Q60960	P99026	Q9D031
P80317	D3YXB7	E0CXT7	A0A1B0GRP7
Q62087	A0A0G2JFP4	Q9CSH3	E9PWQ3
P61164	Q9CWE0	Q4PZA2	Q8BH64
Q9CQ48	Q8R080	H7BXB9	E9Q9E1
Q8K354	Q60817	Q11136	Q61576
Q03350	Q8BWZ3-2	A0A0R4J195	P62806
Q3TTF6	Q3UUU2	E0CZE0	P21981
P09528	F6QKK2	A0A087WPR7	Q9QZE5
Q3ULW8	A0A087WQE6	Q9ET01	Q02053
Q9JJ28	Q8BUU7	A0A494BBI9	Q01149
Q9ERD7	Q8K0Z7	F7C9N6	Q5XJY5
Q80UY2	Q8C605	F8WHU9	Q9R0Y5
Q99LC3	Q8R0I4	A3KGG8	Q99K41
Q91Z50	A0A1Y7VNU2	Q99JR8	Q61425
P50516	Q810D6	Q80XI3-2	Q61554
P97314	Q99KH2	A0A0R4J0L6	A0A140LJL0
Q9ERB0	P17439	D3Z2K2	P12970
P14131	Q3TC93	Q61033	Q9D1Q6
P24270	Q922J3-2	Q91YE8-2	F8WID5
Q8BJU0	P24638	P70677	P97946
Q8BWL5	Q8VHC3	Q9DC04	Q5XJF6
P99027	A0A286YCW8	Q8VDP3	P08121
Q8BTS0	Q99P30	P49935	P67984
A2BDX3	Q8CHP5	Q9CQ49	Q9DAW9
Q99L28	A0A0R3P9C8	S4R287	Q7TMM9
Q9JIH2	Q60605	G3UVU9	P11499
P45878	Q6PE80	Q9Z0N2	P99024
Q05186	Q91VJ4	O70274	P27612
P16045	Q8VCN5	Q99LI5	P00493
P14148	Q6P5E6	A0A2I3BPX3	F8WH81
Q7TPV4	Q9D8Z1	Q8R0A0	Q61035
Q8VIM9	Q9QZB9	Q60902	P37804
D3YUP1	A0A0G2JFY0	Q8JZX9	Q8C2Q7
Q9CQR2	Q3U8Y1	Q9WVJ2	Q01853
Q8C854	O55102	O08912	O89086
E9Q718	Q8R2N2	Q6A078-2	P47955
P62274	P60605	Q91VE0	P15535
Q80ZX0	Q8QZZ7	G3UWH9	A0A3B2WCD8
A0A494BAJ6	Q8BVG4	Q8CCN6	P47880
P06745	A0A2I3BPG9	D3YYT1	Q9R118
B1ASP2	Q69ZQ2	A0A0N4SVS6	Q8BGQ7
Q61249	Q3U1Z5	Q8BFS6	Q8BP43
Q9CQD1	A0A0R4J083	Q91YR7	Q64737
Q8VCB1	Q3UV17	Q5SU71	Q9JLV1
Q9D898	P62331	P35831	P28653
Q9D832	Q8BHA3	F6Z4B2	P60335
Q78YZ6	Q8CJF7	Q922Y0	Q9Z2U1
P35385	Q8BFY7	D3Z2J5	P24369
P29268	Q920Q6	Q8K0M3	Q6PB44
Q8K2A1	Q9JLB2	Q9D5T0	Q9Z1Q5
Q8CCF0	Q9JKB3	Q3TDD9	Q9CQE8
P10605	G3UVV4	A2ASL8	P54728
P62082	Q78RX3	A0A2R8W6Z9	A0A5F8MPB9
P26516	Q8BTY8	E9PUK3	A2AVA0
B7FAU9	Q8R238	Q8CBB7	P68372
A0A338P7B7	E0CXM9	D0VYV6	Q61398
Q9Z0S9	P01029	Q9D0G0	Q62148
P11087	Q61205	A3KGU7	P14873
Q9CXY6	A0A2I3BPY7	Q6ZQ73	Q9QUR6
Q9Z247	A0A494BAQ2	Q9CXE7	Q8CI94
Q8BH04	H3BKW8	A0A0R4J0H7	Q8VEK3
Q9JKX4	Q9D0B5	Q9DBN5	Q9R1P4
Q9CQF9	Q9Z2Z6	H7BX64	Q00780
P58252	O35226	P34152	E9Q0N0
Q99NB8	Q9CPN8	Q9CQI7	O70591
P62751	Q6P6J9	E9PX48	P26040
Q9Z1A1	Q61846	Q8CH18-3	O35226
Q91YJ2	O88207-2	Q9JKB3-2	Q6PGH2
A2AR02	Q62165	Q80U04	H3BJ97
Q80UG5-3	E9QJT2	Q3U741	Q8C9W3
G5E8L2	Q9R0Y5-2	E9QB02	A0A0U1RNJ1
P59325	Q9QYR9	A0A1B0GSX7	Q922I7
Q78PY7	Q9D7Z3	Q99JZ7	P51432
H3BIW0	O70551	Z4YJV4	Q80XR5
Q9CPY7	P97390	E9PYG6	P58871
A0A1B0GSX0	A2ARI0	Q6P1H6	P42208
F6Y616	P19788	Q5SUF2-3	B0R1E3
P83917	Q9EQQ9	Q8CGF7-2	Q91V12-4
Q61792	Q3UD01	B2RUE8	Q64152
Q9DBG7	Q9JHN8	Q64521	P61089
P41105	Q8BGD8	A2AJK8	P97298
O35459	P57746	A2A5Z6	Q6GT24
P67778	Q63810	Q91Z49	Q62318
Q8BT60	Q9JI13	Q8R3Q6	O88207-2
A0A0R4J0P1	Q9CR88	A0A0R4J046	Q62165
Q8BGD9	P97304	Q91YT0	Q8C253
A0A0A6YW28	P62313	Q8C8K1	P15116
Q8BP48	A0A0G2JGK7	P63328	Q9JHW9
E9QPE7	A0A087WRN1	Q9D855	O55234
O35841	A0A494B945	Q8VED5	O09131
Q9DCT2	Q91YM2	Q9D4I9	A0A0G2JGD2
Q61166	Q921N6	Q05C51	P97333
A0A0A6YWM5	P57716	Q8C5W3	Q9Z1D1
E9PZ21	Q80UJ7	A0A1Y7VJP1	Q8R1F1
A0A0R4J0M1	Q61074	Q3UM18	Q61112
Q8CIN4	B1B1D8	F8WJ93	Q91VR5
P18608	Q3T9X3	J3QQ16	Q8BMS2
P14211	Q9EQK5	A2AE27	F8VQJ3
Q9D3D9	Q9CY58	Q6P1Y9	P70428
P62918	E9Q6X0	A0A338P6L5	Q61477
P21107-2	F7C846	A0A0R4J259	Q8VDM4
A2A7A7	A0A2I3BRW0	A0A0R4J1H6	O88544
P40240	Q9R1C7-2	E9PVA2	Q00519
G3X922	G8JL74	Q5SPX8	G5E924
Q9QUJ7	P97363	Q9QYC0	Q99PT1
Q61768	Q8C7X2-2	A0A2R8VK38	Q8VE43
Q9CYD3	Q3TR20	G3XA17	Q9CWK8
Q62093	A2AQ45	K4DI65	O08795
P62960	Q8K2Y7	P05533	A0A0B4J1E7
P42669	F8VPR1	F6XC25	P61982
Q8K411-3	Q5SSH7-2	P28867	Q9CR00
P34022	Q99JA5	B1AU25	P98063
Q9CQI6	B2RQL0	Q9D6L8	Q8VCF1
Q9CYX7	Q99MR6-4	F6R8S6	Q9CWS0
A2AAY5	A2AKD7	Q60838	Q62446
Q99NB9	Q9D8S9	Q3U957	F2Z4A3
V9GXV0	Q7TMG8	Q8R3B1	O35295
Q8BJ71	Q9D1I5	A0A0R4J0U2	Q8C4U3
Q9JJA2	Q6Q899	G3X956	Q99JI1
Q04750	Q64378	Q78XF5	Q80YQ1
Q9ESD7-3	Q6NSR8	B2M1R6	P97346
E9Q317	Q4FCQ7	E0CZD9	P60710
Q99N92	P97377		P97927
P27046	Q8C0E3		Q9Z2L6
Q9Z0H4-6	A0A087WQR6		Q8CFQ9
Q9D1M0	A2ACZ1		Q9CQM9
Q91WE4	P29416		P11276
Q99N87	A0A0G2JGI1		Q8BVQ9
Q9CQW1	Q6NV83-2		A0A1L1SVK0
Q9WTP6	E0CYV0		E9PZ16
A0A494BBF1	P11930		Q9WUM3
P26443	Q3UEB3		P80317
Q8CJG0	Q99MR3		P48024
P63037	Q6PB90		Q03350
G5E899	A2A5R6		Q9Z2X1
Q8BH80	Q99KU0		Q61553
Q8BH59	P49817		P06869
Q80UU9	Q99J25		Q9WVK4
O09110	Q80WW9		P08207
D3Z7P3-2	O35516-2		Q9JJ28
Q9CQ79	G5E8A7		Q9ERD7
Q99P72	O88746		Q9R1P3
P14576	G3UXL2		P33434
Q8BH79	Q8CI32		P68040
Q9CR98	A0A0U1RNN0		Q9D1A2
Q80U87	Q8BHY2		P97314
Q9CY64	A0A494BB11		P84104
Q8VCI5	P61979		P14131
Q6P5F9	Q8VEE0		P97857
Q3U9N4	Q9CY34		P50580
Q9R0P5	A0A140LJD2		Q8VDJ3
P16546-2	H3BJU7		Q9JMH6
P51480	E9PUI5		Q3UKW2
P41241	Q99M51		A0A0R4J0Z1
Q9CR68	Q9JJF9		Q61001
Q6P549	P39876		Q62000
Q9CQ60	Q9D6T9		P14106
P12382	Q08024		P99027
P28740-2	Q9R0C0		P02802
Q99KK7	Q8C0J2		P45878
P48771	Q9CY97		Q05186
P18572-2	O35943		P16045
P97429	G5E8N7		O88844
A0A0J9YUQ8	A0A2I3BR78		Q9CQR2
Q3TWW8	P63087		E9Q718
Q3UI33	Q99N84		E9PY39
P62311	Q9D8T2		Q8CJ69
A0A0R4J0Q5	A0A3Q4EGK0		P06745
A1BN54	P62077		A2BE93
P70271	E9PX53		G5E8R1
Q91WK5	P10852		Q66JS6
G3X8U3	Q8BGJ5		P97464
P26231	E9PYH2		Q9DBR7
Q9CU62	Q52KI8-2		P09240
Q08091	Q8CCJ3		P21956
Q8BFQ1	F6QQP6		Q91YW3
Q8VDW0	Q6ZPF4		P29268
Q5SUR0	D3Z187		P10605
P25206	A8Y5I3		Q8VEE1
A6ZI44	B7ZNP0		P62082
Q9JJC6	Q9JMG1		O09159
Q8JZX4	E9Q1K3		P70441
Q9D3P8	Q99M71		O35685
Q5JC28	Z4YJY0		B7FAU9
Q9CQ65	G3X9M0		P29758
P11983	Q8BVI4		P11087
Q8VCF0	Q3TWF3		Q6ZQ38
P16460	Q62433		O70433
Q922B2	Q69ZS0-2		Q9EPL2
P48036	P28867-2		Q3UM45
P08113	P28033		P58252
Q8R2K3	Q9CQX6		Q91V55
Q9D0F9	Q8BZ36		Q76MZ3
P14206	F6V6T4		P19157
O08917	Q9R059		P52480-2
Q9JIK5	S4R248		O35598
Q8BPG6	H7BX14		Q3UHX2
Q3UDE2	Q60902-2		P62751
P62962	E9Q555		Q60876
E9QAS4	Q9Z0H7		A2AH25
A0A571BEI2	A0A0R4J150		Q80UG5-3
Q3TVK3	A0A2R8W6P6		E9Q1S3
P97450	Q61884		P59325
Q62219	Q99JX3		A0A498WGD8
Q3TPJ8	Q9QZS3		Q78PY7
Q99L13	G3X9Q0		Q9CPY7
Q64010	Q9CZ91		Q00493
Q9EQU5-2	Q5I1X5		Q8VIJ6
Q9DAK9	Q9D7N6		A0A1B0GSX0
O54825	P59017		P63260
Q91YQ5	Q8CJ53		O89017
P60843	Q80XP8		Q61792
Q9CR26	Q8R404		A0A087WSN6
E9QAQ5	A2AL12		A0A0R4J0Q4
Q9D7M8	O70326		Q9JHI0
Q6PDY2	P63163		P13595
Q14B01	Q9Z1J3		P41105
Q3UMB9	E9PYK3		Q9WU78
O35465	Q60766		Q3U962
P70404	E9Q5D6		Q3UE92
Q61712	A0A1Y7VNW0		Q62261
Q9EQI8	G3UXK7		Q99L45
P22907	Q8R574		Q8BGD9
Q8CJ26	Q9ES97-5		Q62465
Q9DAU1	Q61235		Q61166
P18242	E9Q3W4		Q9EQC7
Q8VE22	B1ARU1		P26039
Q9JJI8	A0A494BBN2		Q9ERG0
G3UX48	Q8K2Q0		P62242
F8VQ95	Q8BU31		Q9QUR8
Q3U2G2	Q9D3N8		Q8BG32
G5E8T9	Q91YE3		Q99LX0
P28271	P11404		Q8CIN4
A0A494BB18	D3Z3Z8		Q9ER00
Q9CPQ8	Q3V1T4		Q3TJD7
Q04447	Q8C7Q4-2		Q61508
Q91VE6	Q91V89		F8VPR1
Q8BHN3	Q9QZM4		P62918
P97807	Q80U70		P80314
Q8CG76	P06869		Q9R1P1
P07901	D3Z5J3		Q9CR16
Q8BYA0	Q8VEH6		A0A0J9YUZ4
Q6NZR5	Q3TYX3		Q9QYR6
Q02257	Q8R1V4		A0A0A0MQ90
Q9CQV8	Q3UMT1		P21107-2
D6RFU9	Q9JIP6		Q8BKC5
Q9CQ71	Q8BSH3		Q8R1B4
Q61164	Q8BGS0		Q07797
Q61081	G5DDB7		P47915
Q91VY9	Q9D020		Q61768
Q7TPR4	P47811		Q62093
O89079	Q9D0Y8		P97290
Q9DBG6	Q8CH18		P62960
P28659-4	A0A1W2P775		Q91YR9
Q9CQZ1	Q5SWD9		P42669
P53395	Q3MIA8		Q9EQH3
A2AVJ7	E9Q3I8		P06797
Q9JM13	A0A0R4J0B5		P61358
A0A087WQT6	Q3TN06		Q9QUM9
P62835	E9PVX6-2		Q9D0T1
F6ZFU0	F6RJ39		Q9JK53
P63147	A0A498WGE8		Q9D0I9
Q8BG05-2	Q8R2P8		P61161
I1E4X1	Q5I012		O08807
Q9QXS1-3	Q8C3I8		P19137
P07742	Q3UCV8		Q91YR1
Q9R1T2	A0A2K6EDJ7		Q9D819
Q9Z1N5	Q8CG71		P97315
P48962	Q9ET54-3		P97825
Q9CQE3	Q9Z277-2		P24547
Q9D8U8	Q810A3		Q6ZWY8
Q7TNC4	A0A0G2JGY5		Q9DCD0
Q922D8	E9Q137		P08249
P0C0A3	Q7TMG7		P27046
Q8VHL1	H3BKH2		P09411
Q8BX02	E0CZ22		Q9Z1R9
Q6ZWV3	Q8BU85		Q91V98
P31324	Q8BGT6		Q9CZT5
A0A0U1RQ37	O08582		Q08879
P13020	Q91WC0		Q99LB4
A0A0R4J093	Q7TMQ7		Q6IRU2
Q62348	F8WHW3		O08529
A0A1D5RLY6	Q9D0S9		O35887
Q91ZA3	Q63739		P17182
P34884	Q9CQ88		P29416
A0A0R4J065			Q9WTP6
P16254			P26443
Z4YKB8			P62855
Q6NS46			P70168
Q9JHH9			P35979
Q99LF4			A2AJY2
P51660			G5E899
Q60749			Q64299
Q8BJH1			O09061
Q3UVG3			Q9R0P9
Q9QX47-2			Q9WTQ5
F8WI90			O08749
O35857			P27773
Q8C0E2			Q99P72
P57759			P58774-2
Q9D6U8			Q9CZX8
Q9CQ40			Q9Z0J0
Q9Z2L7			Q3U9N4
F8VQN6			Q60675
F8WGL3			P99029
P35279			Q9R0P5
Q8CIE6			P16546-2
Q3B7Z2			G3X8T3
Q9D880			Q8QZR4
Q9DCM0			Q6PI17
Q9EP72			P47754
A6PWC3			Q8R5C5
Q921M3			P46061
Q8BY87-2			Q9DCT8
Q3TU36			P48759
E9Q449			P62897
P54103			Q9CQ60
P70195			O54724
P68510			P80315
P07141			P70670
P49717			P28654
E9QNA7			A1BN54
O35593			P62702
P63028			P26041
A3KGB4			O09164
Q9D7B7			Q04998
O55222			P14069
Q9DCF9			P26231
O88271			Q99MN1
Q8R2Y2			P14901
Q9WUU7			O54962
A0A2R8VHH1			P47962
P58404			A2AE89
O70194			Q6ZWX6
O88630			Q9DCC5
Q9JHI5			P02798
P20152			Q9R1P0
Q642K5			Q08091
Q60973			E9Q616
P54227			Q8BFQ1
Q99LN9			Q63ZW6
P56391			Q61937
Q5U5M8			A0A1B0GR11
Q99KI0			Q08879-2
P35980			Q9JKR6
Q8R0X7			O35674
D3YUV1			A6ZI44
Q9CR95			A0A0A0MQM7
Q8BYB9			P62320
Q9D7S9			P58022
Q9CW03			P04925
Q9D1J3			P99026
Q8C8U0			P70296
Q00422			Q9WVA4
P62137			O88273
Q8VHE0			A2A7S7
Q3TKY6			Q61598
Q9DCH4			P62334
Q9CX86			P32261
O55029			Q9CQ65
Q9CR57			P11983
O70310			Q9Z1Z0
Q9CYA0			P35700
O70251			P16460
O88685
A2AVR9
Q99JI6
F6RPJ9
P47757-4
Q9CQ19
Q99MJ9
Q8R361
P51863
Q9D945
Q9ERE7
P50428
P32020
Q8K3C3
P31001
Q6A0A9
E9PUG7
P26883
Q80W54
O70400
A2AKI5
Q8R317
Q8BKG3
Q9WV95
Q9CQC7
Q8C181-2
P62301
Q3UW53
Q91YN9
Q91ZJ5
Q4FE56
F8WI14
Q9CQF0
Q9D338
Q9DCC4
P27661
Q00915
P54116
P83870
A2A547
P46467
P40124
Q922V4
Q3V3R1
Q8BH97
Q8C878
O70318
Q9QZL0
Q99KE1
O08599
Q8BFR5
P70445
Q62159
O88958
F8WH23
A0A0G2JDW7
Q8BWY3
P09103
P63242
B1AUN2
A2AL50
A0A1L1STY4
O35074
H9H9R4
Q9R0E2
B2RXW8
Q62095
Q8VEH8
Q9JJA4
A0A087WQS2
Q78HU3
Q8R050
E9Q179
Q8BU33
P43276
Q9JKF1
P62849
Q9CX56
E9QKR0
Q8BMK4
P62071
Q8R086
Q8K094
Q9Z0P4
Q6DFZ1
Q8JZN5
P15532
E9Q1G8
P54822
P10107
P51150
Q9D8L3
Q99M28
G8JL51
Q91VR8
Q05BC3
P02469
Q9D1C8
Q9EQS3
Q91XV3
Q6P5H2
Q9CWF2
Q8JZQ9
Q6P5B5
A0A3B2WBH9
Q6P069
P29341
Q8CGC6
Q7TSV4
Q9D8S4
P63005
Q9D6K9
Q9D031
O88569
Q91VH2
Q8K1M3
Q99KV1
P85094
Q3TMX0
Q8K4Z5
Q9CQK7
P21981
Q6P5D8
D3Z7P3
Q02053
Q8K2C9
A0A0R4J0G4
P50544
P45952
Q9D1Q6
Q99LI7
P61759
Q8R010
P08121
Q9QYA2
Q7TMM9
Q80XI4
Q9D6J6
Q8BZW8
Q6A068
Q05D44
A7YY80
Q61035
P37804
B8JK87
Q62086
A2ADH1
Q01853
Q9DCA5
Q923D4
A0A3B2WCD8
P47955
Q9CPZ8
Q9EPE9
Q99JX7
Q8VC70
P60335
Q9Z2U1
O08784
Q9CQX8
Q2KN98
Q3V3R4
Q99N15
P17047
E9QKZ2
P55264
Q8K2Q7
Q60930
Q9DAM7
P26040
P01831
P56135
P54923
Q80WQ2
P51432
Q9DB20
P31786
D3YU12
E9Q496
Q99MR8
Q91V12-4
Q9DCG9
Q8BSK8
O88587
Q07113
Q6ZPJ3
Q9DCS3
P11440
F8WI30
O55234
P61294
Q9D187
Q3TMS1
Q9Z1D1
Q61216
Q61191
O35900
Q91W50
Q9D8T7
Q6PDN3-3
Q00519
A0A0R4J088
Q9JMC3
A0A0R4J275
G5E924
Q9CWK8
O08795
P61982
Q9CWS0
Q3TLP8
P35762
Q7TT15
P0DOV1
P63094
Q80YQ1
Q07417
Q9D0A3
Q71FD7
G5E911
Q8C4C9
Q9D892
Q9D172
P98083
O35604
Q60648
Q9CQM9
Q9CZN7
Q8CCK0
Q9D154
Q9WUM3
P68134
A2AMY5
Q9D0B6
Q9D2G2
Q9R1P3
H3BLJ9
Q9EQP2
Q8BIW1
Q61686
Q8CAY6
Q99LU0
Q5SYD0
O09005
Q6ZWV7
Q9D1A2
P51949
Q8JZR0
Q3UJB0
Q9WUD1
P20108
Q9D902
Q8BFZ9
Q8VDJ3
A0A0R4J0Z1
O88531
Q9D7H3
P02802
Q99J77
P63011
O88844
P53994
P43883
Q8BP92
P70444
Q91YW3
P68373
P29595
P70290
P29758
P05132
Q3UGB5
Q76MZ3
P62743
Q91V55
P52480-2
Q99N96
O08997
Q9CY50
Q9QXB9
Q9WTL7
Q60876
Q91ZW3
P62307
P62715
P15306
Q9D554
A0A494BB95
A0A498WGD8
P62911
Q7TSG2
H7BX26
P10639
Q99L27
Q62351
P62983
Q9CYN2
Q8CD76
Q6XLQ8
Q62261
E9PVC6
P26039
P62141
Q99LX0
Q8K1M6-3
Q9ER00
O70503
A0A0A0MQ90
Q8BIQ5
Q3V1H1
Q9CRA5
Q91YR9
A2TJV2
Q9QUM9
Q9D0I9
P97315
P97825
Q6ZWY8
P08249
Q61233
B2RXS4
Q61029
Q9D051
Q921F2
Q80U35
Q99LB4
P17182
O35887
P26450
P62855
P35979
O54988-2
Q61206
Q9DBZ1-2
O09061
Q9JHK4
Q80UK0
Q3TCN2
G5E8A0
Q8BJL1
Q61704
Q9Z0G0
E9PUM4
Q9DCX2
Q9DC61
Q8BP71
Q61127
Q9QXT0
Q64105
P10649
G3X8T3
P47754
Q921L5
P62897
Q8BT07
Q3UGS4
E9Q6R7
B2M1R7
Q8BW00
Q9WTX5
P62702
Q9DAR7
A8Y5P4
Q99KQ4
Q9R226
Q99KR3
Q6PGH1
O54962
P47962
Q9CPQ1
Q9DCW4
Q9JJU8
Q8BIJ6
Q99LC2
Q91V61
Q8R3N6
Q9CYG7
E9Q512
P62320
P58022
Q8BVF2
P27659
P30412
P35700
Q99JX4
P83741-4
Q9WUH1
A0A0R4J005
Q9WV54
P62317
Q8BTI8-3
Q8BH69
Q9DC70
Q8C166
O08848
Q9D0Q7
P05202
Q9D820
O70475
Q8BTS4
Q9CRB9
P63276
Q9CPP6
Q9ESX5
Q7M739
Q8CGK3
D3Z4L9
Q9R0N0
P43277
Q9CRD2
Q9WTX2
Q5SSI6
P70349
P49443
Q3U9G9
P14115
P35486
Q8K273
A2ATQ5
O09172
B1ARW4
Q9R0E1
P60670
Q80SZ7
Q9CQ62
Q6ZWQ9
Q9DBG9
A0A0R4J049
Q8R173
A0A1B0GT05
Q7M6Y3-5
Q922F4
P01887
P47877
Q8K023
P61514
Q3THK3
P12032
Q99J99
Q69ZN7
P14824
Q9Z2I8
Q921C5
B2RY04
P68369
Q9CWJ9
Q9DBC7
Q91YL2
P97370
Q3UF95
P24527
Q922W5
Q61753
Q3UPN1
Q91YD9
Q60598
Q9Z1G3
Q9CXW2
Q5SUW3
P17879
Q3UZ39
Q924M7
Q9Z175
K3W4M4
Q8VHK9
Q64669
Q9CQ26
Q9CRB2
Q9Z110
Q91Z53
Q8QZY1
P58021
Q9ERU9
P32233
Q8K0C9
Q8R3M1
Q60864
E9PVA8
Q99JF8
Q8K4L3-3
A0A0R4J078
G5E867
Q99KJ8
P47911
Q9D8X2
A0A0G2JGQ4
Q91YS4
A2APB8
Q9D6T0
Q3TUQ7
P52480
Q3U4W8
P62889
P11438
P48428
P49718
P56480
Q91VJ2
Q8VDN2
E9QMH7
D3Z0M9
Q9CZ30
Q99PL6
Q6P4T2
Q3TJ22
Q9WVQ5
Q60737
Q78ZM0
Q9DBY8
P32067
E0CYM1
E9Q7G0
O55106
Q9CVB6
Q6PAM1
Q8BK64
P51859
Q60605-2
Q01279
Q3U7R1
Q6P9R2
Q61165
Q9DC42
Q9JHP7
Q9DAV6
Q91XD7
Q9ERS2
Q9Z1K5
Q7TSI3
Q7TN29
P40142
Q9Z0F7
P08905
Q99LD8
Q922Y1
Q61733
E9Q1D6
Q60715
Q8BYK6
P62874
P00405
B1AT82
Q8BJY1
E9QAT4
P03958
Q3UXS0
Q9D0J4
Q99N94
Q8R4R6
P70202
Q8BWM0
Q11011
Q91V92
A0A0R4J1D0
O08804
Q3TW96
Q99KR7
Q8R5A3
Q62356
Q4VAA2
Q9D6K8
P63073
Q9D708
Q9CQJ8
Q14B86
P61027
P38647
Q91VZ6
A0A286YDI8
Q8VDC1
Q9D1E6
Q9R0Q7
P35282
Q9D881
Q9JHU9
P62830
Q8BMJ3
P97872
D3Z3A0
Q80X90
Q8CCP0
P62746
P62908
A0A0A0MQA5
O08553
Q3TBT3
A0A1B0GT92
P57787
P14685
Q61263
P70460
G5E829
P97351
Q3UKN6
F8VPU2
O35129
P58742
Q3U816
Q8CBY8-2
A0A0R4J263
Q91YS7
Q99PG2
Q4PJX1
P62264
Q8R127
P49138
Q8C0L8
Q5RKN9
Q8CHR6
Q9DAA6
A0A0G2JEK2
Q8K0C4
P17918
P55302
A2ASW0
P62821
Q8BJW6
P62281
A0A2C9F2D2
Q91V77
Q9WVE8
Q8R2Y8
P63101
Q3UNC9
Q9R099
A0A0B4J1F0
P60867
G3X9V2
Q9QZM0
P97434
Q8BQ47
Q8K310
Q8VD62
Q9CYL5
P50518
H3BJW3
P68433
Q6ZWY3
Q9D824
E9QAN4
Q9JHW2
Q3TML0
Q9Z2N8
Q9D8N0
P70372
Q99JY9
P23780
G3UY42
O08915
P80316
Q9Z1Z2
Q9Z2U0
P62717
P59999
Q8CI51
Q9CQM5
P28301
P07356
E9QMK9
P38060
Q91VW3
Q9CZD3
P70122
Q8R016
Q8BP67
Q9D1P4
Q8R317-2
P21550
Q6ZWZ6
Q8BVU5
E9Q1T1
Q9EQ20
Q9DBE7
Q91XI1
P62806
Q91W97
Q9CQS2
Q01149
Q9Z2X2
Q9JLQ0
D3Z569
P12970
Q925A3
Q5SSZ5
Q9D173
Q9DAW9
P11499
A0A1W2P768
O35345
Q63850
P00493
D5MCW4
Q5EBG6
Q8BY89-2
P60229
Q9CZX7
Q8R3H7
Q9JKX6
O89086
A0A1D5RLN6
Q6NXJ0
Q8CFI7
Q9CQF7
E9PYF1
Q9JLV1
Q6P8I4
P30416
Q8VEH5
Q9Z1Q5
P47963
P08752
F2Z3U3
P68372
F8VPK0
P15626
Q8VCL2
Q8K0D5
O70591
Q91WK2
Q61655
Q6ZWQ5
Q62048
Q6PGH2
Q9EQG9
Q99M31
Q3TIV5
P31750
Q6KAU7-2
Q6DFW4
O54734
O54998
Q8R4U7
G3UW85
Q922U1
Q9D662
Q9D287
P58871
Q99LD9
Q9D753
Q9JK38
Q9EP69
P97298
Q6GT24
Q9JHW9
Q3THK7
P36916
Q9WTX6
Q9CPQ3
Q8BVY0
P18406
Q8R1F1
Q8BFR4
E9QLA5
Q9CZM2
O55142
Q61112
Q8BQ46
F8VQJ3
O54941
E9PWY9
Q6ZQH8
Q8C129
Q9CPX6
O88851
Q3UE37
P16125
A0A0B4J1E7
Q8CE96
P98063
A0A0B4J1E4
A0A0R4J0V5
Q3TB82
Q8JZQ2
P97346
Q9CWW6
P60710
Q9Z2L6
B1AQF4
P28474
P61971
P62305
Q9Z1F9
P48024
Q61553
Q9WVK4
Q61335
P61290
Q8C788
Q8CI11
P68040
Q8BL66
P48722
P97797
F8VPK5
Q99K28
Q3UN10
G3XA48
P97760
Q9D0W5
P50580
Q14C51
Q8VDP4
Q91X78
Q9ESY9
Q9EP97
P57784
Q9D6R2
Q9CQC9
P97471
D3YTQ3
P10518
Q64511
Q9DBR7
Q8VEE1
E9QN31
P70441
Q8VBT0
O70433
Q3TQP6
P19157
A0A286YD34
Q91XH6
Q63844
Q9EQQ2
Q3UHX2
A0A087WSR7
Q8JZZ5
Q9CX00
A2AH25
Q6DVA0
O35864
G3XA59
Q99NF7
Q9EPU0-2
Q3TIX6
Q9WU78
Q3U962
Q3UE92
Q9D1R9
Q9CQN3
Q922H1
P70333
Q9DCW5
P62242
Q8BG32
P51855
Q8VBV7
Q61599
P70362
Q9D0J8
Q3TJD7
F7DBB3
Q9CR16
Q810B6
A0A0J9YUZ4
Q9R1P1
P56873
Q8BKC5
Q8R1B4
Q91WT8
Q9DB25
P05622
A2AN08-3
Q8BLF1
P61358
Q9D0T1
Q80X73
Q921W2
Q9Z1P6
Q920A5
Q9WV98
P61161
Q91YR1
Q9DBL1
Q9DCD0
P09411
Q9Z1R9
Q9CZG3
O88983
Q5SX75
Q60949-2
Q91V41
E9QAJ9
Q6A028
P26350
Q99LP6
Q148V7-3
O54774
Q9R0P9
Q9WTQ5
O08749
Q924C1
Q8BH40
Q6AXB7
P61255
Q9CZ13
Q9Z0Y1
Q9DBS1
Q9QYH6
Q9CQR4
P07091
Q9CQ92
P03930
P99029
Q9D1P0
P55096
O08528
A0A0R4IZW9
Q8K2B3
P62196
Q99LC5
O54724
A0A2I3BQP6
Q80X50-5
P80315
Q6ZWZ7
Q9DBJ3
O88952
P26041
P14069
P14901
P62075
Q8BIG7
E9Q8I7
Q9Z315
P02798
E9Q616
Q9CZW5
P36552
Q8C2Q3
P11688
Q61937
Q9JKR6
P32883-2
Q00PI9
Q61136
Q91VD9
P35951
Q9ER81
P70296
P10404
Q3TXS7
Q9WVA4
P62334
P31938
Q9CR61
Q9CQI3
P62827
Q9CQ54
Q6PB93
Q921W0
P09405
Q80Y14
P53996
Q9JLI8
Q60972
Q99K85
Q7TT50
P62192
P62737
Q99L04
Q9Z2M7
Q60865
A0A2R8VHP9
Q08093
O35215
Q6P8X1
P23116
O70378
A0JNY3
Q8VDD8
Q9QYE6
Q3TE40
Q3TMX5
P22437
P32921
Q80UF4
Q99JB2
P46460
G3X928
Q8C483
G3UZY2
Q60715-2
Q99JI4
P37040
A0A0R4J079
Q3V4D5
Q91YI0
Q99LR1
Q6ZWN5
Q8BH95
Q3UPH1
O70435
E9QA15
Q63918
P26645
Q5SVG5
Q8BWW3
Q9CQQ8
P17156
E9PZF0
Q9CZS1
P10493
Q8BKE6
Q920L1
A2AL85
P70698
Q91YP2
Q9DCJ5
A0A1B0GSG5
P83887
F8WIT2
Q9Z103
Q64727
Q9D104
Q9CPX4
Q9JHJ0
Q61879
Q9DC50
P48758
G3X9T7
Q9D0M3
A0A0A6YVS2
Q9D7P6
Q8BH24
F8WIV2
P52795
Q91XH5
Q9WV55
E9Q3E2
Q9JIG7
Q8K183
Q91XD2
Q8BQM4
A2AFP5
P52479
O35114
A0A494BA97
P70699
P14152
P61028
Q9D1M4
P97452
Q99KP6
Q8C7R4
P70303
A0A1L1SRX2
A0A0R4J0K1
G5E897
P45591
P04104
Q921W7
Q91VH6
P21126
P35278
Q9CYH6
Q8K1N4
P46664
P26187
A0A0A0MQF6
P45376
E9QAH1
Q80VD1
E9Q7K1
Q8VC30
Q9DB29
Q64433
Q62376
Q00612
E9Q2X6
Q5SQM0
P63330
Q9D2Y4
O70305-2
Q9D0R8
Q8VHX6
Q9JKF7
Q9WVB4
Q8BGC4
P30285
Q9D883
Q9DC23
Q9Z2I9
Q9D2R0
P43274
Q9D0B0
G5E8V8
Q923F1
Q543K9
Q99LT0
Q8VE88
P17742
Q8VE47
P59235
Q9D8M4
Q9JMA1
K3W4Q9
Q9R190
Q9DBJ1
A0A0A6YX18
Q9CYA6
P17427
P60122
E9QAD4
B2RY56
Q9R1R8
P13864
Q8BSH9
P46935
Q9CXW3
Q8VDD5
P53810
Q925I1
O08919
P63024
P62259
P10922
Q9R0X4
Q8K2C7
O55022
A2BGI8
Q9Z0H8-2
Q9D358
A0A0R4J1E2
Q8R105
Q64674
A0A0R4J107
Q9QYJ3
Q5F2E8
P28667
Q9JM58
Q9WUA2
P97855
P08228
P97822
O54984
P09055
Q9R0Q1
Q9WTM5
Q06185
Q9QXX4
Q3TUQ5
Q9JK92
Q91YS8
A0A0R4J0I9
Q9D8B3
Q6PE70
P62996
Q3UWL8
Q8K297
Q3UKJ7
P60766
Q9D2M8
Q3UZG4
O88811
Q9QZE7
P0DN34
Q8BFQ4
A2A6T1
Q9DB34
P62900
Q03265
Q920E5
Q8VH51
Q9CPU0
P24668
Q9QUI0
Q9QXE7
Q9WUR9
Q80W68
P62322
B1AR50
Q921U8-2
Q8R570
A0A1L1SUH6
Q5SF07
Q91W86
P62245
Q9CQB5
D3Z069
Q9Z1W9
Q8R1G6
Q8C0D5
Q9Z1Q9
P63268
Q9WUM4
Q9WUK2
G3UWC2
Q8VCQ8
Q62419
Q62189
D3Z4S3
P05201
A0A1B0GRA5
Q9Z0E6
Q8C6E0
Q91Z25
P48678
Q8CG48
P50543
Q9JM14
Q99NH0-2
P08122
Q8BMJ2
Q8R1Q8
Q9Z204-2
Q91W90
Q9QUR7
Q3UIX4
P35564
O35639
Q3UPL0
O88532
P63038
P47738
Q9CRD0
A0A0J9YUL3
P49962
D3Z5N6
P10126
P61222
Q3THS6
Q60770
Q8BRF7
Q9ESP1
Q62167
P58389
Q8K3J1
Q8QZY9
Q9CQX2
P67871
Q9CQ22
Q8BP27
Q6GQT9
V9GXM1
O55143
Q7M6Z4-2
Q9WU28
Q922Q1
Q8BH64
Q6ZQI3
Q68FE6
Q05769
B1AZI6
Q91WS0
Q5XJY5
Q61554
Q9D0F3
Q8BUK6
D3YVW2
Q5XJF6
P84096
A0A494BBB0
P27612
Q6PFA2
P62309
Q8BGH2
P0C605
A0A0A6YVV2
Q8K3H0
Q9CY46
Q9ER67
P62869
A2AMI7
Q8VHM5
Q8BGQ7
A0A0R4J0Q6
Q99KY4-2
Q6PA06
Q8K3X4
P28653
Q921T2-2
P24369
Q9CQE8
Q80SW1
Q9DBG5
Q61398
Q62148
Q9D1J1
F7DEU6
Q9QUR6
Q9Z2I0
Q8CI94
P19253
P26043
A2A9Z2
Q1HFZ0
P15864
Q8R332
Z4YJU8
Q9Z1M8
A0A0R4J1P2
Q6PFB2
P42208
Q99LB6
Q91VM5
P61089
Q8K124
Q8R164
Q8C253
A0A087WRY3
[truncated: 221 more rows]
