# Supplementary material for: Obesity induced by high-fat diet is associated with critical changes in biological and molecular functions of mesenchymal stromal cells present in visceral adipose tissue
Source: publisher site journal article supplement (doi:10.18632/aging.202423), 2020-12-27
Supplement: Supplementary file [file aging-v12i24-202423-supplementary-material-SD3.pdf]

| Names  | total | elements                                                                                                                                                                                                                                                                                                                                                                                                                                                                                                                                                                                                                                                                                                                                                                                                                                                                                                                                                                                                                                                                                                                                                                                                                                                                                                                                                                                                                                                                                                                                                                                                                                                                                                                                                                                                                                                                                                                                                                                                                                                                                                                                                                                                                                                                                                                                                                                                                                                                                                                                                                                                                                                                                                                                                                                                                                                                                                                                                                                                                                                                                                                                                                                                                                                                                                                                                                                                                                                                                                                                                                                                                                                                                                                                                                                                                                                                                                                                                                                                                                                                                                                                                                                                                                                                                                                                                                                                                                                                                                                                                                                                                                                                                                                                                                                                                                                                                                                                                                                                                                                                                                                                                                                                                                                                                                                                                                                                                                                                                                                                                                                                                                                                                                                                                                                                                                                                                                                                                                                                                                                                                                                                                                                                                                                                                                                                                                                                                                                                                                                                                                                                                                                                                                                                                                                                                                                                                                                                                                                                                                                                                                                                                                                                                                                                                                                                                                                                                                                                                                                                                                                                                                                                                                                                                                                                                                                                                                                                                                                                                                                                                                                                                                                                                                                                                                                                                                                                                                                                                                                                                                                                                                                                                                                                                                                                                                                                                                                                                                                                                                                                                                                                                                                                                                                                                                                                                                                                                                                                                                                                                                                                                                                                                                                                                                                                                                                                                                                                                                                                                                                                                                                                                                                                                                                                                                                                                                                                                                                                                                                                                                                                                                                                                                                                                                                                                                                                                                                                                                                                                             |
|--------|-------|--------------------------------------------------------------------------------------------------------------------------------------------------------------------------------------------------------------------------------------------------------------------------------------------------------------------------------------------------------------------------------------------------------------------------------------------------------------------------------------------------------------------------------------------------------------------------------------------------------------------------------------------------------------------------------------------------------------------------------------------------------------------------------------------------------------------------------------------------------------------------------------------------------------------------------------------------------------------------------------------------------------------------------------------------------------------------------------------------------------------------------------------------------------------------------------------------------------------------------------------------------------------------------------------------------------------------------------------------------------------------------------------------------------------------------------------------------------------------------------------------------------------------------------------------------------------------------------------------------------------------------------------------------------------------------------------------------------------------------------------------------------------------------------------------------------------------------------------------------------------------------------------------------------------------------------------------------------------------------------------------------------------------------------------------------------------------------------------------------------------------------------------------------------------------------------------------------------------------------------------------------------------------------------------------------------------------------------------------------------------------------------------------------------------------------------------------------------------------------------------------------------------------------------------------------------------------------------------------------------------------------------------------------------------------------------------------------------------------------------------------------------------------------------------------------------------------------------------------------------------------------------------------------------------------------------------------------------------------------------------------------------------------------------------------------------------------------------------------------------------------------------------------------------------------------------------------------------------------------------------------------------------------------------------------------------------------------------------------------------------------------------------------------------------------------------------------------------------------------------------------------------------------------------------------------------------------------------------------------------------------------------------------------------------------------------------------------------------------------------------------------------------------------------------------------------------------------------------------------------------------------------------------------------------------------------------------------------------------------------------------------------------------------------------------------------------------------------------------------------------------------------------------------------------------------------------------------------------------------------------------------------------------------------------------------------------------------------------------------------------------------------------------------------------------------------------------------------------------------------------------------------------------------------------------------------------------------------------------------------------------------------------------------------------------------------------------------------------------------------------------------------------------------------------------------------------------------------------------------------------------------------------------------------------------------------------------------------------------------------------------------------------------------------------------------------------------------------------------------------------------------------------------------------------------------------------------------------------------------------------------------------------------------------------------------------------------------------------------------------------------------------------------------------------------------------------------------------------------------------------------------------------------------------------------------------------------------------------------------------------------------------------------------------------------------------------------------------------------------------------------------------------------------------------------------------------------------------------------------------------------------------------------------------------------------------------------------------------------------------------------------------------------------------------------------------------------------------------------------------------------------------------------------------------------------------------------------------------------------------------------------------------------------------------------------------------------------------------------------------------------------------------------------------------------------------------------------------------------------------------------------------------------------------------------------------------------------------------------------------------------------------------------------------------------------------------------------------------------------------------------------------------------------------------------------------------------------------------------------------------------------------------------------------------------------------------------------------------------------------------------------------------------------------------------------------------------------------------------------------------------------------------------------------------------------------------------------------------------------------------------------------------------------------------------------------------------------------------------------------------------------------------------------------------------------------------------------------------------------------------------------------------------------------------------------------------------------------------------------------------------------------------------------------------------------------------------------------------------------------------------------------------------------------------------------------------------------------------------------------------------------------------------------------------------------------------------------------------------------------------------------------------------------------------------------------------------------------------------------------------------------------------------------------------------------------------------------------------------------------------------------------------------------------------------------------------------------------------------------------------------------------------------------------------------------------------------------------------------------------------------------------------------------------------------------------------------------------------------------------------------------------------------------------------------------------------------------------------------------------------------------------------------------------------------------------------------------------------------------------------------------------------------------------------------------------------------------------------------------------------------------------------------------------------------------------------------------------------------------------------------------------------------------------------------------------------------------------------------------------------------------------------------------------------------------------------------------------------------------------------------------------------------------------------------------------------------------------------------------------------------------------------------------------------------------------------------------------------------------------------------------------------------------------------------------------------------------------------------------------------------------------------------------------------------------------------------------------------------------------------------------------------------------------------------------------------------------------------------------------------------------------------------------------------------------------------------------------------------------------------------------------------------------------------------------------------------------------------------------------------------------------------------------------------------------------------------------------------------------------------------------------------------------------------------------------------------------------------------------------------------------------------------------------------------------------------------------------------------------------------------------------------------------------------------------------------------------------------------------------------------------------------------------------------------------------------------------------------------------------------------------------------------------------------------------------------------------------------------------------------------------------------------------------|
| DIO ND | 239   | <p>PTEN Regulation</p> <p>p53-Dependent G1 DNA Damage Response</p> <p>Chaperonin-mediated protein folding</p> <p>SUMOylation of DNA replication proteins</p> <p>Vpu mediated degradation of CD4</p> <p>Nonsense Mediated Decay (NMD) independent of the Exon Junction Complex (EJC)</p> <p>Processing of Capped Intron-Containing Pre-mRNA</p> <p>Nuclear import of Rev protein</p> <p>Macroautophagy</p> <p>HSF1 activation</p> <p>Clathrin-mediated endocytosis</p> <p>Switching of origins to a post-replicative state</p> <p>Late Phase of HIV Life Cycle</p> <p>Response of EIF2AK4 (GCN2) to amino acid deficiency</p> <p>ISG15 antiviral mechanism</p> <p>Dectin-1 mediated noncanonical NF-kB signaling</p> <p>Translation</p> <p>COP1-independent Golgi-to-ER retrograde traffic</p> <p>G2/M Transition</p> <p>Interactions of Rev with host cellular proteins</p> <p>Autodegradation of the E3 ubiquitin ligase COP1</p> <p>Vpr-mediated nuclear import of PICs</p> <p>NIK-&gt;noncanonical NF-kB signaling</p> <p>RNA Polymerase II Transcription Termination</p> <p>S Phase</p> <p>Transport of Mature mRNA derived from an Intron-Containing Transcript</p> <p>Cyclin A:Cdk2-associated events at S phase entry</p> <p>Nuclear Pore Complex (NPC) Disassembly</p> <p>Cellular responses to stress</p> <p>Folding of actin by CCT/TriC</p> <p>Regulation of APC/C activators between G1/S and early anaphase</p> <p>Attenuation phase</p> <p>Signaling by NOTCH4</p> <p>APC/C-mediated degradation of cell cycle proteins</p> <p>Cdc20:Phospho-APC/C mediated degradation of Cyclin A</p> <p>Activation of APC/C and APC/C:Cdc20 mediated degradation of mitotic proteins</p> <p>Hedgehog 'off' state</p> <p>UCH proteinases</p> <p>p53-Independent DNA Damage Response</p> <p>Cellular response to heat stress</p> <p>Nonsense Mediated Decay (NMD) enhanced by the Exon Junction Complex (EJC)</p> <p>Neutrophil degranulation</p> <p>Gene and protein expression by JAK-STAT signaling after Interleukin-12 stimulation</p> <p>Transport of the SLBP independent Mature mRNA</p> <p>Nuclear Envelope (NE) Reassembly</p> <p>Degradation of GLI2 by the proteasome</p> <p>Transport of Mature mRNAs Derived from Intronless Transcripts</p> <p>Ub-specific processing proteases</p> <p>Apoptosis induced DNA fragmentation</p> <p>Regulation of RUNX2 expression and activity</p> <p>Mitotic Prometaphase</p> <p>Translocation of SLC2A4 (GLUT4) to the plasma membrane</p> <p>RUNX1 regulates transcription of genes involved in differentiation of HSCs</p> <p>APC:Cdc20 mediated degradation of cell cycle proteins prior to satisfaction of the cell cycle checkpoint</p> <p>Metabolism of RNA</p> <p>Membrane Trafficking</p> <p>p53-Independent G1/S DNA damage checkpoint</p> <p>Degradation of beta-catenin by the destruction complex</p> <p>Regulation of Apoptosis</p> <p>Glycolysis</p> <p>Apoptosis</p> <p>Vesicle-mediated transport</p> <p>Interactions of Vpr with host cellular proteins</p> <p>Transport of Ribonucleoproteins into the Host Nucleus</p> <p>ABC-family proteins mediated transport</p> <p>SUMOylation of SUMOylation proteins</p> <p>APC/C:Cdc20 mediated degradation of mitotic proteins</p> <p>Signaling by Hedgehog</p> <p>Cross-presentation of soluble exogenous antigens (endosomes)</p> <p>CLEC7A (Dectin-1) signaling</p> <p>Hedgehog 'on' state</p> <p>Transport to the Golgi and subsequent modification</p> <p>p53-Dependent G1/S DNA damage checkpoint</p> <p>TCR signaling</p> <p>CDT1 association with the CDC6:ORC:origin complex</p> <p>Hh mutants that don't undergo autocatalytic processing are degraded by ERAD</p> <p>Assembly of the pre-replicative complex</p> <p>APC/C:Cdh1 mediated degradation of Cdc20 and other APC/C:Cdh1 targeted proteins in late mitosis/early G1</p> <p>Aggrephagy</p> <p>Hh mutants abrogate ligand secretion</p> <p>DNA Replication Pre-Initiation</p> <p>Regulation of ornithine decarboxylase (ODC)</p> <p>XBP1(S) activates chaperone genes</p> <p>Defective CFTR causes cystic fibrosis</p> <p>Mitochondrial protein import</p> <p>SUMOylation of chromatin organization proteins</p> <p>Autophagy</p> <p>Metabolism of polyamines</p> <p>Orc1 removal from chromatin</p> <p>M Phase</p> <p>MHC class II antigen presentation</p> <p>mRNA Splicing - Major Pathway</p> <p>Metabolism of proteins</p> <p>Regulation of PTEN stability and activity</p> <p>trans-Golgi Network Vesicle Budding</p> <p>Major pathway of rRNA processing in the nucleolus and cytosol</p> <p>FGFR2 alternative splicing</p> <p>Separation of Sister Chromatids</p> <p>Vif-mediated degradation of APOBEC3G</p> <p>Selenocysteine synthesis</p> <p>Negative regulation of NOTCH4 signaling</p> <p>Prefoldin mediated transfer of substrate to CCT/TriC</p> <p>Host Interactions of HIV factors</p> <p>RHO GTPases Activate WASPs and WAVes</p> <p>Viral Messenger RNA Synthesis</p> <p>Transcriptional regulation by RUNX3</p> <p>rRNA processing</p> <p>Downstream TCR signaling</p> <p>Unfolded Protein Response (UPR)</p> <p>DNA Replication</p> <p>Complex I biogenesis</p> <p>Eukaryotic Translation Termination</p> <p>Nervous system development</p> <p>Interleukin-1 signaling</p> <p>Antiviral mechanism by IFN-stimulated genes</p> <p>Regulation of HSF1-mediated heat shock response</p> <p>Cytosolic tRNA aminoacylation</p> <p>G1/S DNA Damage Checkpoints</p> <p>Activation upon binding of the cap-binding complex and eIFs, and subsequent binding to 43S</p> <p>Rev-mediated nuclear export of HIV RNA</p> <p>ER to Golgi Anterograde Transport</p> <p>Stabilization of p53</p> <p>Eukaryotic Translation Elongation</p> <p>CDK-mediated phosphorylation and removal of Cdc6</p> <p>PCP/CE pathway</p> <p>Mitotic G2-G2/M phases</p> <p>Axon guidance</p> <p>Post-chaperonin tubulin folding pathway</p> <p>HSF1-dependent transactivation</p> <p>Degradation of AXIN</p> <p>Regulation of mitotic cell cycle</p> <p>The citric acid (TCA) cycle and respiratory electron transport</p> <p>Nuclear Envelope Breakdown</p> <p>Programmed Cell Death</p> <p>NS1 Mediated Effects on Host Pathways</p> <p>RHO GTPases Activate Formins</p> <p>HIV Life Cycle</p> <p>Influenza Infection</p> <p>L13a-mediated translational silencing of Ceruloplasmin expression</p> <p>Beta-catenin independent WNT signaling</p> <p>Peptide chain elongation</p> <p>GLI3 is processed to GLI3R by the proteasome</p> <p>Metabolism of non-coding RNA</p> <p>Translation initiation complex formation</p> <p>Viral mRNA Translation</p> <p>SCF(Skp2)-mediated degradation of p27/p21</p> <p>Activation of NF-kappaB in B cells</p> <p>snRNP Assembly</p> <p>Mitotic Prophase</p> <p>Oxygen-dependent proline hydroxylation of Hypoxia-inducible Factor Alpha</p> <p>Cristae formation</p> <p>COP1-mediated anterograde transport</p> <p>Protein folding</p> <p>Signaling by ROBO receptors</p> <p>Selenoamino acid metabolism</p> <p>Eukaryotic Translation Initiation</p> <p>NEP/NS2 Interacts with the Cellular Export Machinery</p> <p>Cap-dependent Translation Initiation</p> <p>Transport of the SLBP Dependant Mature mRNA</p> <p>ABC transporter disorders</p> <p>IRE1alpha activates chaperones</p> <p>Mitotic Anaphase</p> <p>Protein localization</p> <p>SUMOylation of RNA binding proteins</p> <p>Golgi Associated Vesicle Biogenesis</p> <p>Selective autophagy</p> <p>Regulation of Glucokinase by Glucokinase Regulatory Protein</p> <p>Cell-extracellular matrix interactions</p> <p>HIV Infection</p> <p>HSP90 chaperone cycle for steroid hormone receptors (SHR)</p> <p>Signaling by Interleukins</p> <p>Interleukin-12 family signaling</p> <p>G1/S Transition</p> <p>APC/C:Cdc20 mediated degradation of Securin</p> <p>Transcriptional regulation by small RNAs</p> <p>Ubiquitin-dependent degradation of Cyclin D</p> <p>SRP-dependent cotranslational protein targeting to membrane</p> <p>Golgi-to-ER retrograde transport</p> <p>Postmitotic nuclear pore complex (NPC) reformation</p> <p>L1CAM interactions</p> <p>Cell Cycle Checkpoints</p> <p>Asymmetric localization of PCP proteins</p> <p>G2/M Checkpoints</p> <p>Respiratory electron transport</p> <p>Cellular responses to external stimuli</p> <p>Degradation of DVL</p> <p>Ribosomal scanning and start codon recognition</p> <p>Glucose metabolism</p> <p>Hedgehog ligand biogenesis</p> <p>RHO GTPase Effectors</p> <p>Transport of Mature Transcript to Cytoplasm</p> <p>Autodegradation of Cdh1 by Cdh1:APC/C</p> <p>Synthesis of DNA</p> <p>Respiratory electron transport, ATP synthesis by chemiosmotic coupling, and heat production by uncoupling proteins.</p> <p>mRNA Splicing - Minor Pathway</p> <p>Cellular response to hypoxia</p> <p>Downstream signaling events of B Cell Receptor (BCR)</p> <p>COP1-dependent Golgi-to-ER retrograde traffic</p> <p>rRNA processing in the nucleus and cytosol</p> <p>Transcriptional regulation by RUNX2</p> <p>Metabolism of amino acids and derivatives</p> <p>Export of Viral Ribonucleoproteins from Nucleus</p> <p>TNFR2 non-canonical NF-kB pathway</p> <p>Interleukin-12 signaling</p> <p>Deubiquitination</p> <p>Formation of the ternary complex, and subsequently, the 43S complex</p> <p>Regulation of mRNA stability by proteins that bind AU-rich elements</p> <p>Influenza Viral RNA Transcription and Replication</p> <p>Asparagine N-linked glycosylation</p> <p>Cyclin E associated events during G1/S transition</p> <p>Gene Silencing by RNA</p> <p>MAPK6/MAPK4 signaling</p> <p>Regulation of activated PAK-2p34 by proteasome mediated degradation</p> <p>Mitotic G1 phase and G1/S transition</p> <p>Cell Cycle</p> <p>Mitotic Metaphase and Anaphase</p> <p>Cooperation of Prefoldin and TriC/CCT in actin and tubulin folding</p> <p>mRNA Splicing</p> <p>Formation of a pool of free 40S subunits</p> <p>Ubiquitin Mediated Degradation of Phosphorylated Cdc25A</p> <p>Intra-Golgi and retrograde Golgi-to-ER traffic</p> <p>Regulation of RUNX3 expression and activity</p> <p>mRNA 3'-end processing</p> <p>Formation of tubulin folding intermediates by CCT/TriC</p> <p>tRNA processing in the nucleus</p> <p>Transport of Mature mRNA Derived from an Intronless Transcript</p> <p>GTP hydrolysis and joining of the 60S ribosomal subunit</p> <p>SUMOylation of ubiquitylation proteins</p> <p>Degradation of GLI1 by the proteasome</p> <p>Defective TPR may confer susceptibility towards thyroid papillary carcinoma (TPC)</p> <p>Nonsense-Mediated Decay (NMD)</p> <p>The role of GTSE1 in G2/M progression after G2 checkpoint</p> <p>SCF-beta-TrCP mediated degradation of Emi1</p> <p>FBXL7 down-regulates AURKA during mitotic entry and in early mitosis</p> <p>Recycling pathway of L1</p> <p>Cell Cycle, Mitotic</p> <p>AUF1 (hnRNP D0) binds and destabilizes mRNA</p> <p>Regulation of RAS by GAPs</p> <p>Regulation of expression of SLITs and ROBOs</p> |
| ND     | 19    | <p>Resolution of Sister Chromatid Cohesion</p> <p>Platelet degranulation</p> <p>Signal transduction by L1</p> <p>COP1-mediated vesicle transport</p> <p>Mitochondrial translation elongation</p> <p>Response to elevated platelet cytosolic Ca2+</p> <p>Synthesis of active ubiquitin: roles of E1 and E2 enzymes</p> <p>Formation of TC-NER Pre-Initiation Complex</p> <p>RHO GTPases activate KTN1</p> <p>RHO GTPases activate CIT</p> <p>Amplification of signal from unattached kinetochores via a MAD2 inhibitory signal</p> <p>Signaling by Rho GTPases</p> <p>Amplification of signal from the kinetochores</p> <p>Neddylolation</p> <p>RHO GTPases Activate ROCKs</p> <p>EML4 and NUDC in mitotic spindle formation</p> <p>Mitochondrial translation</p> <p>Mitochondrial translation initiation</p> <p>Mitochondrial translation termination</p>                                                                                                                                                                                                                                                                                                                                                                                                                                                                                                                                                                                                                                                                                                                                                                                                                                                                                                                                                                                                                                                                                                                                                                                                                                                                                                                                                                                                                                                                                                                                                                                                                                                                                                                                                                                                                                                                                                                                                                                                                                                                                                                                                                                                                                                                                                                                                                                                                                                                                                                                                                                                                                                                                                                                                                                                                                                                                                                                                                                                                                                                                                                                                                                                                                                                                                                                                                                                                                                                                                                                                                                                                                                                                                                                                                                                                                                                                                                                                                                                                                                                                                                                                                                                                                                                                                                                                                                                                                                                                                                                                                                                                                                                                                                                                                                                                                                                                                                                                                                                                                                                                                                                                                                                                                                                                                                                                                                                                                                                                                                                                                                                                                                                                                                                                                                                                                                                                                                                                                                                                                                                                                                                                                                                                                                                                                                                                                                                                                                                                                                                                                                                                                                                                                                                                                                                                                                                                                                                                                                                                                                                                                                                                                                                                                                                                                                                                                                                                                                                                                                                                                                                                                                                                                                                                                                                                                                                                                                                                                                                                                                                                                                                                                                                                                                                                                                                                                                                                                                                                                                                                                                                                                                                                                                                                                                                                                                                                                                                                                                                                                                                                                                                                                                                                                                                                                                                                                                                                                                                                                                                                                                                                                                                                                                                                                                                                                                                                                                                                                                                                                                                                                                                                                            |
| DIO    | 17    | <p>AURKA Activation by TPX2</p> <p>SUMOylation of DNA damage response and repair proteins</p> <p>Intracellular signaling by second messengers</p> <p>Apoptotic execution phase</p> <p>Cargo recognition for clathrin-mediated endocytosis</p> <p>Infectious disease</p> <p>Signaling by WNT</p> <p>MAPK family signaling cascades</p> <p>Processing of Capped Intronless Pre-mRNA</p> <p>Interleukin-1 family signaling</p> <p>tRNA Aminoacylation</p> <p>Signaling by MET</p> <p>Signaling by FGFR2</p> <p>Signaling by BRAF and RAF fusions</p> <p>TCF dependent signaling in response to WNT</p> <p>Regulation of PLK1 Activity at G2/M Transition</p> <p>PIP3 activates AKT signaling</p>                                                                                                                                                                                                                                                                                                                                                                                                                                                                                                                                                                                                                                                                                                                                                                                                                                                                                                                                                                                                                                                                                                                                                                                                                                                                                                                                                                                                                                                                                                                                                                                                                                                                                                                                                                                                                                                                                                                                                                                                                                                                                                                                                                                                                                                                                                                                                                                                                                                                                                                                                                                                                                                                                                                                                                                                                                                                                                                                                                                                                                                                                                                                                                                                                                                                                                                                                                                                                                                                                                                                                                                                                                                                                                                                                                                                                                                                                                                                                                                                                                                                                                                                                                                                                                                                                                                                                                                                                                                                                                                                                                                                                                                                                                                                                                                                                                                                                                                                                                                                                                                                                                                                                                                                                                                                                                                                                                                                                                                                                                                                                                                                                                                                                                                                                                                                                                                                                                                                                                                                                                                                                                                                                                                                                                                                                                                                                                                                                                                                                                                                                                                                                                                                                                                                                                                                                                                                                                                                                                                                                                                                                                                                                                                                                                                                                                                                                                                                                                                                                                                                                                                                                                                                                                                                                                                                                                                                                                                                                                                                                                                                                                                                                                                                                                                                                                                                                                                                                                                                                                                                                                                                                                                                                                                                                                                                                                                                                                                                                                                                                                                                                                                                                                                                                                                                                                                                                                                                                                                                                                                                                                                                                                                                                                                                                                                                                                                                                                                                                                                                                                                                                                                                                                                                                                                                                                                                        |

| Names  | total | elements                                                                                                                                                                                                                                                                                                                                                                                                                                                                                                                                                                                                                                                                                                                                                                                                                                                                                                                                                                                                                                                                                                                                                                                                                                                                                                                                                                                                                                                                                                                                                                                                                                                                                                                                                                                                                                                                                                                                                                                                                                                                                                                                                                                                                                                                                                                                                                                                                                                                                                                                                                                                                                                                                                                                                                                                                                                                                                                                                                                                                                                                                                                                                                                                                                                                                                                                                                                                                                                                                                                                                                                                                                                                                                                                                                                                                                                                                                                                                                                                                                                                                                                                                                                                                                                                                                                                                                                                                                                                                                                                                                                                                                                                                                                                                                                                                                                                                                                                                                                                                                                                                                                                                                                                                                                                                                                                                                                                                                                                                                                                                                                                                                                                                                                                                                                                                                                                                                                                                                                                                                                                                                                                                                                                                                                                                                                                                                                                                                                                                                                                                                                                                                                                                                                                                                                                                                                                                                                                                                                                                                                                                                                                                                                                                                                                                                                                                                                                                                                                                                                                                                                                                                                                                                                                                                                                                                                                                                                                                                                                                                                                                                                                                                                                                                                                                                                                                                                                                                                                                                                                                                                                                                                                                                                                                                                                                                                                                                                                                                                                                                                                                                                                                                                                                                                                                                                                                                                                                                                                                                                                                                                                                                                                                                                                                                                                                                                                                                                                                                                                                                                                                                                                                                                                                                                                                                                                                                                                                                                                                            |  |  |
|--------|-------|-----------------------------------------------------------------------------------------------------------------------------------------------------------------------------------------------------------------------------------------------------------------------------------------------------------------------------------------------------------------------------------------------------------------------------------------------------------------------------------------------------------------------------------------------------------------------------------------------------------------------------------------------------------------------------------------------------------------------------------------------------------------------------------------------------------------------------------------------------------------------------------------------------------------------------------------------------------------------------------------------------------------------------------------------------------------------------------------------------------------------------------------------------------------------------------------------------------------------------------------------------------------------------------------------------------------------------------------------------------------------------------------------------------------------------------------------------------------------------------------------------------------------------------------------------------------------------------------------------------------------------------------------------------------------------------------------------------------------------------------------------------------------------------------------------------------------------------------------------------------------------------------------------------------------------------------------------------------------------------------------------------------------------------------------------------------------------------------------------------------------------------------------------------------------------------------------------------------------------------------------------------------------------------------------------------------------------------------------------------------------------------------------------------------------------------------------------------------------------------------------------------------------------------------------------------------------------------------------------------------------------------------------------------------------------------------------------------------------------------------------------------------------------------------------------------------------------------------------------------------------------------------------------------------------------------------------------------------------------------------------------------------------------------------------------------------------------------------------------------------------------------------------------------------------------------------------------------------------------------------------------------------------------------------------------------------------------------------------------------------------------------------------------------------------------------------------------------------------------------------------------------------------------------------------------------------------------------------------------------------------------------------------------------------------------------------------------------------------------------------------------------------------------------------------------------------------------------------------------------------------------------------------------------------------------------------------------------------------------------------------------------------------------------------------------------------------------------------------------------------------------------------------------------------------------------------------------------------------------------------------------------------------------------------------------------------------------------------------------------------------------------------------------------------------------------------------------------------------------------------------------------------------------------------------------------------------------------------------------------------------------------------------------------------------------------------------------------------------------------------------------------------------------------------------------------------------------------------------------------------------------------------------------------------------------------------------------------------------------------------------------------------------------------------------------------------------------------------------------------------------------------------------------------------------------------------------------------------------------------------------------------------------------------------------------------------------------------------------------------------------------------------------------------------------------------------------------------------------------------------------------------------------------------------------------------------------------------------------------------------------------------------------------------------------------------------------------------------------------------------------------------------------------------------------------------------------------------------------------------------------------------------------------------------------------------------------------------------------------------------------------------------------------------------------------------------------------------------------------------------------------------------------------------------------------------------------------------------------------------------------------------------------------------------------------------------------------------------------------------------------------------------------------------------------------------------------------------------------------------------------------------------------------------------------------------------------------------------------------------------------------------------------------------------------------------------------------------------------------------------------------------------------------------------------------------------------------------------------------------------------------------------------------------------------------------------------------------------------------------------------------------------------------------------------------------------------------------------------------------------------------------------------------------------------------------------------------------------------------------------------------------------------------------------------------------------------------------------------------------------------------------------------------------------------------------------------------------------------------------------------------------------------------------------------------------------------------------------------------------------------------------------------------------------------------------------------------------------------------------------------------------------------------------------------------------------------------------------------------------------------------------------------------------------------------------------------------------------------------------------------------------------------------------------------------------------------------------------------------------------------------------------------------------------------------------------------------------------------------------------------------------------------------------------------------------------------------------------------------------------------------------------------------------------------------------------------------------------------------------------------------------------------------------------------------------------------------------------------------------------------------------------------------------------------------------------------------------------------------------------------------------------------------------------------------------------------------------------------------------------------------------------------------------------------------------------------------------------------------------------------------------------------------------------------------------------------------------------------------------------------------------------------------------------------------------------------------------------------------------------------------------------------------------------------------------------------------------------------------------------------------------------------------------------------------------------------------------------------------------------------------------------------------------------------------------------------------------------------------------------------------------------------------------------------------------------------------------------------------------------------------------------------------------------------------------------------------------------------------------------------------------------------------------------------------------------------------------------------------------------------------------------------------------------------------------------------------------------------------------------------------------------------------------------------------------------------------------------------------------------------------------------------------------------------------------------------------------------------------------------------------------------------------------------------------------------------------------------------------------------------------|--|--|
| DIO ND | 232   | <p>PTEN Regulation</p> <p>p53-Dependent G1 DNA Damage Response</p> <p>Chaperonin-mediated protein folding</p> <p>Transcriptional regulation by RUNX1</p> <p>Vpu mediated degradation of CD4</p> <p>Nonsense Mediated Decay (NMD) independent of the Exon Junction Complex (EJC)</p> <p>Antigen processing-Cross presentation</p> <p>Extracellular matrix organization</p> <p>MET promotes cell motility</p> <p>MET activates PTK2 signaling</p> <p>Switching of origins to a post-replicative state</p> <p>Collagen formation</p> <p>Innate Immune System</p> <p>Response of EIF2AK4 (GCN2) to amino acid deficiency</p> <p>Dectin-1 mediated noncanonical NF-kB signaling</p> <p>Translation</p> <p>COPI-independent Golgi-to-ER retrograde traffic</p> <p>G2/M Transition</p> <p>Platelet degranulation</p> <p>Autodegradation of the E3 ubiquitin ligase COP1</p> <p>NIK--&gt;noncanonical NF-kB signaling</p> <p>Smooth Muscle Contraction</p> <p>S Phase</p> <p>Cyclin A:Cdk2-associated events at S phase entry</p> <p>Non-integrin membrane-ECM interactions</p> <p>Cellular responses to stress</p> <p>Folding of actin by CCT/TriC</p> <p>Regulation of APC/C activators between G1/S and early anaphase</p> <p>Signaling by NOTCH4</p> <p>APC/C-mediated degradation of cell cycle proteins</p> <p>Cdc20:Phospho-APC/C mediated degradation of Cyclin A</p> <p>Activation of APC/C and APC/C:Cdc20 mediated degradation of mitotic proteins</p> <p>Hedgehog 'off' state</p> <p>UCH proteinases</p> <p>Syndecan interactions</p> <p>p53-Independent DNA Damage Response</p> <p>RHO GTPases activate PAKs</p> <p>Signaling by NOTCH</p> <p>Nonsense Mediated Decay (NMD) enhanced by the Exon Junction Complex (EJC)</p> <p>Neutrophil degranulation</p> <p>EPH-Ephrin signaling</p> <p>Gene and protein expression by JAK-STAT signaling after Interleukin-12 stimulation</p> <p>Nuclear Envelope (NE) Reassembly</p> <p>Degradation of GLI2 by the proteasome</p> <p>Fc epsilon receptor (FCER1) signaling</p> <p>Ub-specific processing proteases</p> <p>Regulation of RUNX2 expression and activity</p> <p>Response to elevated platelet cytosolic Ca2+</p> <p>Translocation of SLC2A4 (GLUT4) to the plasma membrane</p> <p>RUNX1 regulates transcription of genes involved in differentiation of HSCs</p> <p>APC:Cdc20 mediated degradation of cell cycle proteins prior to satisfaction of the cell cycle checkpoint</p> <p>Metabolism of RNA</p> <p>p53-Independent G1/S DNA damage checkpoint</p> <p>Degradation of beta-catenin by the destruction complex</p> <p>Regulation of Apoptosis</p> <p>Apoptosis</p> <p>Disease</p> <p>Post-translational protein modification</p> <p>ABC-family proteins mediated transport</p> <p>APC/C:Cdc20 mediated degradation of mitotic proteins</p> <p>Collagen biosynthesis and modifying enzymes</p> <p>Signaling by Hedgehog</p> <p>Cross-presentation of soluble exogenous antigens (endosomes)</p> <p>CLECK7A (Dectin-1) signaling</p> <p>Hedgehog 'on' state</p> <p>p53-Dependent G1/S DNA damage checkpoint</p> <p>TCR signaling</p> <p>CDT1 association with the CDC6:ORC:origin complex</p> <p>Cytokine Signaling in Immune system</p> <p>Signaling by the B Cell Receptor (BCR)</p> <p>Hh mutants that don't undergo autocatalytic processing are degraded by ERAD</p> <p>Assembly of the pre-replicative complex</p> <p>ER-Phagosome pathway</p> <p>APC/C:Cdh1 mediated degradation of Cdc20 and other APC/C:Cdh1 targeted proteins in late mitosis/early G1</p> <p>Infectious disease</p> <p>Post-translational protein phosphorylation</p> <p>Aggrephagy</p> <p>Hh mutants abrogate ligand secretion</p> <p>DNA Replication Pre-Initiation</p> <p>XBP1(S) activates chaperone genes</p> <p>Regulation of ornithine decarboxylase (ODC)</p> <p>Defective CFTR causes cystic fibrosis</p> <p>Antigen processing: Ubiquitination &amp; Proteasome degradation</p> <p>Signaling by WNT</p> <p>Orc1 removal from chromatin</p> <p>Metabolism of polyamines</p> <p>Assembly of collagen fibrils and other multimeric structures</p> <p>MAPK family signaling cascades</p> <p>M Phase</p> <p>MHC class II antigen presentation</p> <p>Metabolism of proteins</p> <p>Regulation of PTEN stability and activity</p> <p>Transport of connexons to the plasma membrane</p> <p>Major pathway of rRNA processing in the nucleolus and cytosol</p> <p>Developmental Biology</p> <p>Vif-mediated degradation of APOBEC3G</p> <p>Separation of Sister Chromatids</p> <p>Interleukin-1 family signaling</p> <p>Selenocysteine synthesis</p> <p>Negative regulation of NOTCH4 signaling</p> <p>Prefoldin mediated transfer of substrate to CCT/TriC</p> <p>Host Interactions of HIV factors</p> <p>C-type lectin receptors (CLRs)</p> <p>RHO GTPases Activate WASPs and WAVES</p> <p>Transcriptional regulation by RUNX3</p> <p>Regulation of Insulin-like Growth Factor (IGF) transport and uptake by Insulin-like Growth Factor Binding Proteins (IGFBPs)</p> <p>rRNA processing</p> <p>NCAM1 interactions</p> <p>Downstream TCR signaling</p> <p>Unfolded Protein Response (UPR)</p> <p>Microtubule-dependent trafficking of connexons from Golgi to the plasma membrane</p> <p>DNA Replication</p> <p>Eukaryotic Translation Termination</p> <p>Elastic fibre formation</p> <p>Nervous system development</p> <p>Interleukin-1 signaling</p> <p>Cytosolic tRNA aminoacylation</p> <p>G1/S DNA Damage Checkpoints</p> <p>Activation of the mRNA upon binding of the cap-binding complex and eIFs, and subsequent binding to 43S</p> <p>Recruitment of NuMA to mitotic centrosomes</p> <p>Degradation of the extracellular matrix</p> <p>Stabilization of p53</p> <p>Eukaryotic Translation Elongation</p> <p>CDK-mediated phosphorylation and removal of Cdc6</p> <p>PCP/CE pathway</p> <p>Mitotic G2-G2/M phases</p> <p>Axon guidance</p> <p>Post-chaperonin tubulin folding pathway</p> <p>tRNA Aminoacylation</p> <p>Degradation of AXIN</p> <p>Regulation of mitotic cell cycle</p> <p>Platelet activation, signaling and aggregation</p> <p>Signaling by Rho GTPases</p> <p>Programmed Cell Death</p> <p>Semaphorin interactions</p> <p>RHO GTPases Activate Formins</p> <p>Interleukin-4 and Interleukin-13 signaling</p> <p>Influenza infection</p> <p>L13a-mediated translational silencing of Ceruloplasmin expression</p> <p>Beta-catenin independent WNT signaling</p> <p>Peptide chain elongation</p> <p>RAF/MAP kinase cascade</p> <p>GLI3 is processed to GLI3R by the proteasome</p> <p>Signaling by Receptor Tyrosine Kinases</p> <p>Translation initiation complex formation</p> <p>Viral mRNA Translation</p> <p>SCF(Skp2)-mediated degradation of p27/p21</p> <p>Laminin interactions</p> <p>Activation of NF-kappaB in B cells</p> <p>Anchoring fibril formation</p> <p>MAPK1/MAPK3 signaling</p> <p>FLT3 Signaling</p> <p>Oxygen-dependent proline hydroxylation of Hypoxia-inducible Factor Alpha</p> <p>Dissolution of Fibrin Clot</p> <p>Protein folding</p> <p>COPI-mediated anterograde transport</p> <p>Signaling by ROBO receptors</p> <p>Selenoamino acid metabolism</p> <p>Eukaryotic Translation Initiation</p> <p>Cap-dependent Translation Initiation</p> <p>RHO GTPases activate IQGAPs</p> <p>ABC transporter disorders</p> <p>IRE1alpha activates chaperones</p> <p>Mitotic Anaphase</p> <p>Selective autophagy</p> <p>Cell-extracellular matrix interactions</p> <p>HIV Infection</p> <p>HSP90 chaperone cycle for steroid hormone receptors (SHR)</p> <p>Signaling by Interleukins</p> <p>Interleukin-12 family signaling</p> <p>G1/S Transition</p> <p>APC/C:Cdc20 mediated degradation of Securin</p> <p>Ubiquitin-dependent degradation of Cyclin D</p> <p>SRP-dependent cotranslational protein targeting to membrane</p> <p>Golgi-to-ER retrograde transport</p> <p>L1CAM interactions</p> <p>Cell Cycle Checkpoints</p> <p>Neddylaton</p> <p>Asymmetric localization of PCP proteins</p> <p>G2/M Checkpoints</p> <p>Cellular responses to external stimuli</p> <p>Degradation of DVL</p> <p>Ribosomal scanning and start codon recognition</p> <p>Hedgehog ligand biogenesis</p> <p>RHO GTPase Effectors</p> <p>Autodegradation of Cdh1 by Cdh1:APC/C</p> <p>Synthesis of DNA</p> <p>Cellular response to hypoxia</p> <p>Crosslinking of collagen fibrils</p> <p>Association of TriC/CCT with target proteins during biosynthesis</p> <p>Downstream signaling events of B Cell Receptor (BCR)</p> <p>rRNA processing in the nucleus and cytosol</p> <p>Transcriptional regulation by RUNX2</p> <p>Metabolism of amino acids and derivatives</p> <p>TNFR2 non-canonical NF-kB pathway</p> <p>Molecules associated with elastic fibres</p> <p>Interleukin-12 signaling</p> <p>Deubiquitination</p> <p>Formation of the ternary complex, and subsequently, the 43S complex</p> <p>Influenza Viral RNA Transcription and Replication</p> <p>Regulation of mRNA stability by proteins that bind AU-rich elements</p> <p>EPHB-mediated forward signaling</p> <p>Cyclin E associated events during G1/S transition</p> <p>Collagen degradation</p> <p>ECM proteoglycans</p> <p>TCF dependent signaling in response to WNT</p> <p>MAPK6/MAPK4 signaling</p> <p>Regulation of activated PAK-2p34 by proteasome mediated degradation</p> <p>Mitotic G1 phase and G1/S transition</p> <p>FCER1 mediated NF-kB activation</p> <p>Cell Cycle</p> <p>Mitotic Metaphase and Anaphase</p> <p>Cooperation of Prefoldin and TriC/CCT in actin and tubulin folding</p> <p>Formation of a pool of free 40S subunits</p> <p>Ubiquitin Mediated Degradation of Phosphorylated Cdc25A</p> <p>Regulation of RUNX3 expression and activity</p> <p>Formation of tubulin folding intermediates by CCT/TriC</p> <p>Collagen chain trimerization</p> <p>GTP hydrolysis and joining of the 60S ribosomal subunit</p> <p>Degradation of GLI1 by the proteasome</p> <p>Nonsense-Mediated Decay (NMD)</p> <p>The role of GTSE1 in G2/M progression after G2 checkpoint</p> <p>SCF-beta-TrCP mediated degradation of Emi1</p> <p>FBXL7 down-regulates AURKA during mitotic entry and in early mitosis</p> <p>Recycling pathway of L1</p> <p>Cell Cycle, Mitotic</p> <p>AUF1 (hnRNP D0) binds and destabilizes mRNA</p> <p>Integrin cell surface interactions</p> <p>Regulation of RAS by GAPs</p> <p>Regulation of expression of SLITs and ROBOs</p> <p>Diseases associated with glycosaminoglycan metabolism</p> <p>Immune System</p> |  |  |
| ND     | 8     | <p>Adaptive Immune System</p> <p>Homeostasis</p> <p>Class I MHC mediated antigen processing &amp; presentation</p> <p>Chk1/Chk2(Cds1) mediated inactivation of Cyclin B:Cdk1 complex</p> <p>Detoxification of Reactive Oxygen Species</p> <p>Gluconeogenesis</p> <p>Activation of Matrix Metalloproteinases</p> <p>Activation of BAD and translocation to mitochondria</p>                                                                                                                                                                                                                                                                                                                                                                                                                                                                                                                                                                                                                                                                                                                                                                                                                                                                                                                                                                                                                                                                                                                                                                                                                                                                                                                                                                                                                                                                                                                                                                                                                                                                                                                                                                                                                                                                                                                                                                                                                                                                                                                                                                                                                                                                                                                                                                                                                                                                                                                                                                                                                                                                                                                                                                                                                                                                                                                                                                                                                                                                                                                                                                                                                                                                                                                                                                                                                                                                                                                                                                                                                                                                                                                                                                                                                                                                                                                                                                                                                                                                                                                                                                                                                                                                                                                                                                                                                                                                                                                                                                                                                                                                                                                                                                                                                                                                                                                                                                                                                                                                                                                                                                                                                                                                                                                                                                                                                                                                                                                                                                                                                                                                                                                                                                                                                                                                                                                                                                                                                                                                                                                                                                                                                                                                                                                                                                                                                                                                                                                                                                                                                                                                                                                                                                                                                                                                                                                                                                                                                                                                                                                                                                                                                                                                                                                                                                                                                                                                                                                                                                                                                                                                                                                                                                                                                                                                                                                                                                                                                                                                                                                                                                                                                                                                                                                                                                                                                                                                                                                                                                                                                                                                                                                                                                                                                                                                                                                                                                                                                                                                                                                                                                                                                                                                                                                                                                                                                                                                                                                                                                                                                                                                                                                                                                                                                                                                                                                                                                                                                                                                                                                          |  |  |
| DIO    | 32    | <p>NCAM signaling for neurite out-growth</p> <p>Processing of Capped Intron-Containing Pre-mRNA</p> <p>HSF1 activation</p> <p>Chaperone Mediated Autophagy</p> <p>Defective B3GAT3 causes JDSSDDH</p> <p>Loss of Nlp from mitotic centrosomes</p> <p>Attenuation phase</p> <p>Cellular response to heat stress</p> <p>Defective EXT2 causes exostoses 2</p> <p>Signaling by PDGF</p> <p>Membrane Trafficking</p> <p>Advanced glycosylation endproduct receptor signaling</p> <p>Vesicle-mediated transport</p> <p>Transport to the Golgi and subsequent modification</p> <p>Antagonism of Activin by Follistatin</p> <p>mRNA Splicing - Major Pathway</p> <p>RHO GTPases activate CIT</p> <p>Regulation of HSF1-mediated heat shock response</p> <p>ER to Golgi Anterograde Transport</p> <p>HSF1-dependent transactivation</p> <p>Loss of proteins required for interphase microtubule organization from the centrosome</p> <p>Signaling by MET</p> <p>Neurodegenerative Diseases</p> <p>Defective B4GALT7 causes EDS, progeroid type</p> <p>Defective B3GALT6 causes EDS2 and SEMD11</p> <p>RHO GTPases Activate ROCKs</p> <p>COPI-dependent Golgi-to-ER retrograde traffic</p> <p>mRNA Splicing</p> <p>Intra-Golgi and retrograde Golgi-to-ER traffic</p> <p>Regulation of PLK1 Activity at G2/M transition</p> <p>Deregulated CDK5 triggers multiple neurodegenerative pathways in Alzheimer's disease models</p> <p>Defective EXT1 causes exostoses 1, TRPS2 and CHDS</p>                                                                                                                                                                                                                                                                                                                                                                                                                                                                                                                                                                                                                                                                                                                                                                                                                                                                                                                                                                                                                                                                                                                                                                                                                                                                                                                                                                                                                                                                                                                                                                                                                                                                                                                                                                                                                                                                                                                                                                                                                                                                                                                                                                                                                                                                                                                                                                                                                                                                                                                                                                                                                                                                                                                                                                                                                                                                                                                                                                                                                                                                                                                                                                                                                                                                                                                                                                                                                                                                                                                                                                                                                                                                                                                                                                                                                                                                                                                                                                                                                                                                                                                                                                                                                                                                                                                                                                                                                                                                                                                                                                                                                                                                                                                                                                                                                                                                                                                                                                                                                                                                                                                                                                                                                                                                                                                                                                                                                                                                                                                                                                                                                                                                                                                                                                                                                                                                                                                                                                                                                                                                                                                                                                                                                                                                                                                                                                                                                                                                                                                                                                                                                                                                                                                                                                                                                                                                                                                                                                                                                                                                                                                                                                                                                                                                                                                                                                                                                                                                                                                                                                                                                                                                                                                                                                                                                                                                                                                                                                                                                                                                                                                                                                                                                                                                                                                                                                                                                                                                                                                                                                                                                                                                                                                                                                                                                                                                                                                                                                                                                      |  |  |

| Names | total | elements                                                                                                                                                                                                                                                                                                                                                                                                                                                                                                                                                                                                                                                                                                                                                                                                                                                                                                                                                                                                                                           |                                                                                                                                                                                                                                                                                                                                                                                                                                                                                                                                                                                                                                                                                                                                                                                                                                                                                                                                                                                                                                                                                                                                                                                                                                                                                                                                                                                                                                                                                                                                                                                                                                                                                                                                                                                                                                                                                                                                                                                                                                                                                                                                                                                                                                                                                                                                                                                                                                                                                                                                                                                                                                                                                                                                                                                                                                                                                                                                                                                                                                                                                                                                                                                                                                                                                                                                                                                                                                                                                                                                                                                                                                                                                                                                                                                                                                                                                                                                                                                                                                                                                                                                                                                                                                                                                                                                                                                                                                                                                                                                                                                                                                                                                                                                                                                                                                                                                                                                                                                                                                                                                                                                                                                                                                                                                                                                                                                                                                                                                                                                                                                                                                                                                                                                                                                                                                                                                                                                                                                                                                                                                                                                                                                                                                                                                                                                                                                                                                                                                                                                                                                                                                                                                                                                                                                                                                                                                                                                                                                                                                                                                                                                                                                                                                                                                                                                                                                                                                                                                                                                                                                                                                                                                                                                                                                                                                                                                                                                                                                                                                                                                                                                                                                                                                                                                                                                                                                                                                                                                                                                                                                                                                                                                                                                                                                                                                                                                                                                                                                                                                                                                                                                                                                                                                                                                                                                                                                                                                                                                                                                                                                                                                                                                                                                                                                                                                                                                                                                                                                                                                                                                                                                                                                                                                                                                                                                                                                                                                                                                                                                                                                                                                                                                                                                                                                                                                                                                                                                                    |  |  |
|-------|-------|----------------------------------------------------------------------------------------------------------------------------------------------------------------------------------------------------------------------------------------------------------------------------------------------------------------------------------------------------------------------------------------------------------------------------------------------------------------------------------------------------------------------------------------------------------------------------------------------------------------------------------------------------------------------------------------------------------------------------------------------------------------------------------------------------------------------------------------------------------------------------------------------------------------------------------------------------------------------------------------------------------------------------------------------------|----------------------------------------------------------------------------------------------------------------------------------------------------------------------------------------------------------------------------------------------------------------------------------------------------------------------------------------------------------------------------------------------------------------------------------------------------------------------------------------------------------------------------------------------------------------------------------------------------------------------------------------------------------------------------------------------------------------------------------------------------------------------------------------------------------------------------------------------------------------------------------------------------------------------------------------------------------------------------------------------------------------------------------------------------------------------------------------------------------------------------------------------------------------------------------------------------------------------------------------------------------------------------------------------------------------------------------------------------------------------------------------------------------------------------------------------------------------------------------------------------------------------------------------------------------------------------------------------------------------------------------------------------------------------------------------------------------------------------------------------------------------------------------------------------------------------------------------------------------------------------------------------------------------------------------------------------------------------------------------------------------------------------------------------------------------------------------------------------------------------------------------------------------------------------------------------------------------------------------------------------------------------------------------------------------------------------------------------------------------------------------------------------------------------------------------------------------------------------------------------------------------------------------------------------------------------------------------------------------------------------------------------------------------------------------------------------------------------------------------------------------------------------------------------------------------------------------------------------------------------------------------------------------------------------------------------------------------------------------------------------------------------------------------------------------------------------------------------------------------------------------------------------------------------------------------------------------------------------------------------------------------------------------------------------------------------------------------------------------------------------------------------------------------------------------------------------------------------------------------------------------------------------------------------------------------------------------------------------------------------------------------------------------------------------------------------------------------------------------------------------------------------------------------------------------------------------------------------------------------------------------------------------------------------------------------------------------------------------------------------------------------------------------------------------------------------------------------------------------------------------------------------------------------------------------------------------------------------------------------------------------------------------------------------------------------------------------------------------------------------------------------------------------------------------------------------------------------------------------------------------------------------------------------------------------------------------------------------------------------------------------------------------------------------------------------------------------------------------------------------------------------------------------------------------------------------------------------------------------------------------------------------------------------------------------------------------------------------------------------------------------------------------------------------------------------------------------------------------------------------------------------------------------------------------------------------------------------------------------------------------------------------------------------------------------------------------------------------------------------------------------------------------------------------------------------------------------------------------------------------------------------------------------------------------------------------------------------------------------------------------------------------------------------------------------------------------------------------------------------------------------------------------------------------------------------------------------------------------------------------------------------------------------------------------------------------------------------------------------------------------------------------------------------------------------------------------------------------------------------------------------------------------------------------------------------------------------------------------------------------------------------------------------------------------------------------------------------------------------------------------------------------------------------------------------------------------------------------------------------------------------------------------------------------------------------------------------------------------------------------------------------------------------------------------------------------------------------------------------------------------------------------------------------------------------------------------------------------------------------------------------------------------------------------------------------------------------------------------------------------------------------------------------------------------------------------------------------------------------------------------------------------------------------------------------------------------------------------------------------------------------------------------------------------------------------------------------------------------------------------------------------------------------------------------------------------------------------------------------------------------------------------------------------------------------------------------------------------------------------------------------------------------------------------------------------------------------------------------------------------------------------------------------------------------------------------------------------------------------------------------------------------------------------------------------------------------------------------------------------------------------------------------------------------------------------------------------------------------------------------------------------------------------------------------------------------------------------------------------------------------------------------------------------------------------------------------------------------------------------------------------------------------------------------------------------------------------------------------------------------------------------------------------------------------------------------------------------------------------------------------------------------------------------------------------------------------------------------------------------------------------------------------------------------------------------------------------------------------------------------------------------------------------------------------------------------------------------------------------------------------------------------------------------------------------------------------------------------------------------------------------------------------------------------------------------------------------------------------------------------------------------------------------------------------------------------------------------------------------------------------------------------------------------------------------------------------------------------------------------------------------------------------------------------------------------------------------------------------------------------------------------------------------------------------------------------------------------------------------------------------------------------------------------------------------------------------------------------------------------------------------------------------------------------------------------------------------------------------------------------------------------------------------------------------------------------------------------------------------------------------------------------------------------------------------------------------------------------------------------------------------------------------------------------------------------------------------------------------------------------------------------------------------------------------------------------------------------------------------------------------------------------------------------------------------------------------------------------------------------------------------------------------------------------------------------------------------------------------------------------------------------------------------------------------------------------------------------------------------------------------------------------------------------------------------------------------|--|--|
| DIO   | ND    | 269                                                                                                                                                                                                                                                                                                                                                                                                                                                                                                                                                                                                                                                                                                                                                                                                                                                                                                                                                                                                                                                | <ul style="list-style-type: none"> <li>Reelin Signaling in Neurons</li> <li>Molecular Mechanisms of Cancer</li> <li>Dopamine Receptor Signaling</li> <li>fMLP Signaling in Neutrophils</li> <li>Xenobiotic Metabolism General Signaling Pathway</li> <li>UVA-Induced MAPK Signaling</li> <li>Role of NFAT in Regulation of the Immune Response</li> <li>Methionine Degradation I (to Homocysteine)</li> <li>LPS-stimulated MAPK Signaling</li> <li>Glycogen Degradation III</li> <li>Cardiac Hypertrophy Signaling</li> <li>Insulin Secretion Signaling Pathway</li> <li>IL-22 Signaling</li> <li>Signaling by Rho Family GTPases</li> <li>Neurotrophin/TRK Signaling</li> <li>Role of Tissue Factor in Cancer</li> <li>Fatty Acid CE2-oxidation</li> <li>Senescence Pathway</li> <li>Role of NFAT in Cardiac Hypertrophy</li> <li>Ephrin Receptor Signaling</li> <li>DNA Methylation and Transcriptional Repression Signaling</li> <li>ErbB Signaling</li> <li>Melanocyte Development and Pigmentation Signaling</li> <li>Aspartate Degradation II</li> <li>Cancer Drug Resistance By Drug Efflux</li> <li>GNRH Signaling</li> <li>Isoleucine Degradation I</li> <li>Arginine Degradation VI (Arginase 2 Pathway)</li> <li>Adrenomedullin signaling pathway</li> <li>CNTF Signaling</li> <li>Unfolded protein response</li> <li>BMP signaling pathway</li> <li>Endocannabinoid Developing Neuron Pathway</li> <li>Mechanisms of Viral Exit from Host Cells</li> <li>Proline Biosynthesis II (from Arginine)</li> <li>Acetyl-CoA Biosynthesis I (Pyruvate Dehydrogenase Complex)</li> <li>Estrogen-Dependent Breast Cancer Signaling</li> <li>Apelin Adipocyte Signaling Pathway</li> <li>Glucose and Glucose-1-phosphate Degradation</li> <li>PFKFB4 Signaling Pathway</li> <li>Leukocyte Extravasation Signaling</li> <li>IL-6 Signaling</li> <li>Endometrial Cancer Signaling</li> <li>Regulation of IL-2 Expression in Activated and Anergic T Lymphocytes</li> <li>Remodeling of Epithelial Adherens Junctions</li> <li>Caveolar-mediated Endocytosis Signaling</li> <li>CTLA4 Signaling in Cytotoxic T Lymphocytes</li> <li>mTOR Signaling</li> <li>Telomerase Signaling</li> <li>UVC-Induced MAPK Signaling</li> <li>Neuregulin Signaling</li> <li>Pentose Phosphate Pathway (Oxidative Branch)</li> <li>Ephrin B Signaling</li> <li>RAN Signaling</li> <li>Xenobiotic Metabolism CAR Signaling Pathway</li> <li>Hypoxia Signaling in the Cardiovascular System</li> <li>Superpathway of Inositol Phosphate Compounds</li> <li>Ethanol Degradation IV</li> <li>GP6 Signaling Pathway</li> <li>Non-Small Cell Lung Cancer Signaling</li> <li>HIF1CE± Signaling</li> <li>Role of PKR in Interferon Induction and Antiviral Response</li> <li>Prostate Cancer Signaling</li> <li>Synaptic Long Term Potentiation</li> <li>Acute Myeloid Leukemia Signaling</li> <li>Ethanol Degradation II</li> <li>Hepatic Fibrosis Signaling Pathway</li> <li>Histamine Degradation</li> <li>Leucine Degradation I</li> <li>RhoGDI Signaling</li> <li>PAK Signaling</li> <li>Synaptogenesis Signaling Pathway</li> <li>GE±12/13 Signaling</li> <li>Proline Biosynthesis I</li> <li>ErbB2-ErbB3 Signaling</li> <li>Salvage Pathways of Pyrimidine Ribonucleotides</li> <li>tRNA Charging</li> <li>Autophagy</li> <li>Tight Junction Signaling</li> <li>Huntington's Disease Signaling</li> <li>Colanic Acid Building Blocks Biosynthesis</li> <li>Opioid Signaling Pathway</li> <li>Xenobiotic Metabolism Signaling</li> <li>CCR3 Signaling in Eosinophils</li> <li>Inhibition of ARE-Mediated mRNA Degradation Pathway</li> <li>eNOS Signaling</li> <li>Prolactin Signaling</li> <li>PPARCE±/RXRCE± Activation</li> <li>Aggrin Interactions at Neuromuscular Junction</li> <li>PDGF Signaling</li> <li>Ceramide Signaling</li> <li>Valine Degradation I</li> <li>Glycogen Biosynthesis II (from UDP-D-Glucose)</li> <li>Oxidative Ethanol Degradation III</li> <li>Tec Kinase Signaling</li> <li>VEGF Signaling</li> <li>Cellular Effects of Sildenafil (Viagra)</li> <li>Virus Entry via Endocytic Pathways</li> <li>Thioredoxin Pathway</li> <li>p70S6K Signaling</li> <li>ERK/MAPK Signaling</li> <li>Regulation of Actin-based Motility by Rho</li> <li>Mitochondrial Dysfunction</li> <li>Nitric Oxide Signaling in the Cardiovascular System</li> <li>Oncostatin M Signaling</li> <li>Aryl Hydrocarbon Receptor Signaling</li> <li>Aldosterone Signaling in Epithelial Cells</li> <li>D-myo-inositol (1,4,5,6)-Tetrakisphosphate Biosynthesis</li> <li>Protein Ubiquitination Pathway</li> <li>Tetrahydrofolate Salvage from 5,10-methylenetetrahydrofolate</li> <li>Putrescine Degradation III</li> <li>Macropinocytosis Signaling</li> <li>Superpathway of Geranylgeranyldiphosphate Biosynthesis I (via Mevalonate)</li> <li>Erythropoietin Signaling</li> <li>Thrombin Signaling</li> <li>D-myo-inositol (3,4,5,6)-tetrakisphosphate Biosynthesis</li> <li>NF-CE±B Activation by Viruses</li> <li>Integrin Signaling</li> <li>Superpathway of Methionine Degradation</li> <li>GE±linolenate Biosynthesis II (Animals)</li> <li>HGF Signaling</li> <li>PI3K/AKT Signaling</li> <li>Glutathione Biosynthesis</li> <li>GDP-mannose Biosynthesis</li> <li>Glioma Invasiveness Signaling</li> <li>Lipid Antigen Presentation by CD1</li> <li>EGF Signaling</li> <li>IL-17 Signaling</li> <li>Axonal Guidance Signaling</li> <li>GM-CSF Signaling</li> <li>Glutaryl-CoA Degradation</li> <li>PPAR Signaling</li> <li>SPINK1 General Cancer Pathway</li> <li>IL-2 Signaling</li> <li>Semaphorin Signaling in Neurons</li> <li>Epithelial Adherens Junction Signaling</li> <li>Role of JAK1 and JAK3 in CE±Cytokine Signaling</li> <li>Mevalonate Pathway I</li> <li>AMPK Signaling</li> <li>NER Pathway</li> <li>Cdc42 Signaling</li> <li>Antiproliferative Role of Somatostatin Receptor 2</li> <li>Natural Killer Cell Signaling</li> <li>GDNF Family Ligand-Receptor Interactions</li> <li>ERK5 Signaling</li> <li>Cysteine Biosynthesis III (mammalia)</li> <li>Gap Junction Signaling</li> <li>G Beta Gamma Signaling</li> <li>RhoA Signaling</li> <li>Glioblastoma Multiforme Signaling</li> <li>Superpathway of Serine and Glycine Biosynthesis I</li> <li>IL-8 Signaling</li> <li>Renin-Angiotensin Signaling</li> <li>Production of Nitric Oxide and Reactive Oxygen Species in Macrophages</li> <li>IL-3 Signaling</li> <li>Coronavirus Pathogenesis Pathway</li> <li>GE±q Signaling</li> <li>Role of MAPK Signaling in the Pathogenesis of Influenza</li> <li>NGF Signaling</li> <li>ILK Signaling</li> <li>Paxillin Signaling</li> <li>Glioma Signaling</li> <li>Colorectal Cancer Metastasis Signaling</li> <li>Heme Biosynthesis from Uroporphyrinogen-III I</li> <li>Gluconeogenesis I</li> <li>GDP-glucose Biosynthesis</li> <li>3-phosphoinositide Degradation</li> <li>PEDF Signaling</li> <li>Semaphorin Neuronal Repulsive Signaling Pathway</li> <li>Thrombopoietin Signaling</li> <li>Melatonin Signaling</li> <li>SAPK/JNK Signaling</li> <li>UDP-N-acetyl-D-glucosamine Biosynthesis II</li> <li>Granzyme A Signaling</li> <li>Purine Nucleotides De Novo Biosynthesis II</li> <li>Chronic Myeloid Leukemia Signaling</li> <li>Glutathione Redox Reactions II</li> <li>GE±Adrenergic Signaling</li> <li>Renal Cell Carcinoma Signaling</li> <li>Hereditary Breast Cancer Signaling</li> <li>NADH Repair</li> <li>PTEN Signaling</li> <li>Angiotensin Signaling</li> <li>Fatty Acid CE±oxidation I</li> <li>JAK/Stat Signaling</li> <li>TCA Cycle II (Eukaryotic)</li> <li>Clathrin-mediated Endocytosis Signaling</li> <li>Role of JAK family kinases in IL-6-type Cytokine Signaling</li> <li>BAG2 Signaling Pathway</li> <li>Dopamine Degradation</li> <li>Phagosome Maturation</li> <li>UDP-N-acetyl-D-galactosamine Biosynthesis II</li> <li>Phenylethylamine Degradation I</li> <li>Chemokine Signaling</li> <li>Methylglyoxal Degradation III</li> <li>EIF2 Signaling</li> <li>Phospholipase C Signaling</li> <li>IL-15 Signaling</li> <li>Iron homeostasis signaling pathway</li> <li>Cleavage and Polyadenylation of Pre-mRNA</li> <li>CDK5 Signaling</li> <li>Actin Nucleation by ARP-WASP Complex</li> <li>FLT3 Signaling in Hematopoietic Progenitor Cells</li> <li>14-3-3-mediated Signaling</li> <li>Inosine-5'-phosphate Biosynthesis II</li> <li>Glycolysis I</li> <li>Fc Epsilon RI Signaling</li> <li>Ketogenesis</li> <li>Systemic Lupus Erythematosus Signaling</li> <li>Sertoli Cell-Sertoli Cell Junction Signaling</li> <li>UVB-Induced MAPK Signaling</li> <li>IL-1 Signaling</li> <li>Noradrenaline and Adrenaline Degradation</li> <li>ErbB4 Signaling</li> <li>Necroptosis Signaling Pathway</li> <li>Amyloid Processing</li> <li>Heme Biosynthesis II</li> <li>Arginine Biosynthesis IV</li> <li>Superpathway of Cholesterol Biosynthesis</li> <li>CXCR4 Signaling</li> <li>Xenobiotic Metabolism PXR Signaling Pathway</li> <li>Sirtuin Signaling Pathway</li> <li>Regulation of Cellular Mechanics by Calpain Protease</li> <li>ATM Signaling</li> <li>Oxidative Phosphorylation</li> <li>Germ Cell-Sertoli Cell Junction Signaling</li> <li>Pentose Phosphate Pathway</li> <li>Pyridoxal 5'-phosphate Salvage Pathway</li> <li>Apelin Endothelial Signaling Pathway</li> <li>P2Y Purinergic Receptor Signaling Pathway</li> <li>Retinoate Biosynthesis I</li> <li>Cholecystokinin/Gastrin-mediated Signaling</li> <li>B Cell Receptor Signaling</li> <li>Tryptophan Degradation X (Mammalian, via Tryptamine)</li> <li>Protein Kinase A Signaling</li> <li>RAR Activation</li> <li>Rac Signaling</li> <li>Apoptosis Signaling</li> <li>Actin Cytoskeleton Signaling</li> <li>HIPPO signaling</li> <li>Acute Phase Response Signaling</li> <li>Superoxide Radicals Degradation</li> <li>D-myo-inositol-5-phosphate Metabolism</li> <li>Estrogen Receptor Signaling</li> <li>Prostanoid Biosynthesis</li> <li>Insulin Receptor Signaling</li> <li>Tryptophan Degradation III (Eukaryotic)</li> <li>CREB Signaling in Neurons</li> <li>Pyrimidine Ribonucleotides De Novo Biosynthesis</li> <li>Dopamine-DARPP32 Feedback in cAMP Signaling</li> <li>Mouse Embryonic Stem Cell Pluripotency</li> <li>Spliceosomal Cycle</li> <li>Sumoylation Pathway</li> <li>FAK Signaling</li> <li>Xenobiotic Metabolism AHR Signaling Pathway</li> <li>Stearate Biosynthesis I (Animals)</li> <li>Androgen Signaling</li> <li>FcCE± Receptor-mediated Phagocytosis in Macrophages and Monocytes</li> <li>Pancreatic Adenocarcinoma Signaling</li> <li>Ketolysis</li> <li>IGF-1 Signaling</li> <li>Heme Degradation</li> <li>Glycogen Degradation II</li> <li>Mitotic Roles of Polo-Like Kinase</li> <li>Glucocorticoid Receptor Signaling</li> <li>FAT10 Signaling Pathway</li> <li>Melanoma Signaling</li> <li>Regulation of eIF4 and p70S6K Signaling</li> <li>NRF2-mediated Oxidative Stress Response</li> </ul> |  |  |
| ND    | 23    | <ul style="list-style-type: none"> <li>Hepatic Fibrosis / Hepatic Stellate Cell Activation</li> <li>Thyroid Cancer Signaling</li> <li>Cardiac Hypertrophy Signaling (Enhanced)</li> <li>Glutathione Redox Reactions I</li> <li>NF-CE±B Signaling</li> <li>Death Receptor Signaling</li> <li>2-oxobutanoate Degradation I</li> <li>Methylmalonyl Pathway</li> <li>FAT10 Cancer Signaling Pathway</li> <li>VEGF Family Ligand-Receptor Interactions</li> <li>Ovarian Cancer Signaling</li> <li>TGF-CE± Signaling</li> <li>GE±i Signaling</li> <li>Synaptic Long Term Depression</li> <li>Leptin Signaling in Obesity</li> <li>PI3K Signaling in B Lymphocytes</li> <li>Regulation Of The Epithelial-Mesenchymal Transition By Growth Factors Pathway</li> <li>Regulation of the Epithelial-Mesenchymal Transition Pathway</li> <li>Cardiac CE±-adrenergic Signaling</li> <li>HMGBl Signaling</li> <li>Pyrimidine Deoxyribonucleotides De Novo Biosynthesis I</li> <li>HER-2 Signaling in Breast Cancer</li> <li>T Cell Receptor Signaling</li> </ul> |                                                                                                                                                                                                                                                                                                                                                                                                                                                                                                                                                                                                                                                                                                                                                                                                                                                                                                                                                                                                                                                                                                                                                                                                                                                                                                                                                                                                                                                                                                                                                                                                                                                                                                                                                                                                                                                                                                                                                                                                                                                                                                                                                                                                                                                                                                                                                                                                                                                                                                                                                                                                                                                                                                                                                                                                                                                                                                                                                                                                                                                                                                                                                                                                                                                                                                                                                                                                                                                                                                                                                                                                                                                                                                                                                                                                                                                                                                                                                                                                                                                                                                                                                                                                                                                                                                                                                                                                                                                                                                                                                                                                                                                                                                                                                                                                                                                                                                                                                                                                                                                                                                                                                                                                                                                                                                                                                                                                                                                                                                                                                                                                                                                                                                                                                                                                                                                                                                                                                                                                                                                                                                                                                                                                                                                                                                                                                                                                                                                                                                                                                                                                                                                                                                                                                                                                                                                                                                                                                                                                                                                                                                                                                                                                                                                                                                                                                                                                                                                                                                                                                                                                                                                                                                                                                                                                                                                                                                                                                                                                                                                                                                                                                                                                                                                                                                                                                                                                                                                                                                                                                                                                                                                                                                                                                                                                                                                                                                                                                                                                                                                                                                                                                                                                                                                                                                                                                                                                                                                                                                                                                                                                                                                                                                                                                                                                                                                                                                                                                                                                                                                                                                                                                                                                                                                                                                                                                                                                                                                                                                                                                                                                                                                                                                                                                                                                                                                                                                                                                    |  |  |
| DIO   | 12    | <ul style="list-style-type: none"> <li>CD40 Signaling</li> <li>Kinetochore Metaphase Signaling Pathway</li> <li>PRPP Biosynthesis I</li> <li>Apelin Liver Signaling Pathway</li> <li>Pyrimidine Ribonucleotides Interconversion</li> <li>3-phosphoinositide Biosynthesis</li> <li>Endocannabinoid Cancer Inhibition Pathway</li> <li>Apelin Cardiomyocyte Signaling Pathway</li> <li>4-1BB Signaling in T Lymphocytes</li> <li>Cell Cycle: G2/M DNA Damage Checkpoint Regulation</li> <li>Molybdenum Cofactor Biosynthesis</li> <li>Cell Cycle Control of Chromosomal Replication</li> </ul>                                                                                                                                                                                                                                                                                                                                                                                                                                                       |                                                                                                                                                                                                                                                                                                                                                                                                                                                                                                                                                                                                                                                                                                                                                                                                                                                                                                                                                                                                                                                                                                                                                                                                                                                                                                                                                                                                                                                                                                                                                                                                                                                                                                                                                                                                                                                                                                                                                                                                                                                                                                                                                                                                                                                                                                                                                                                                                                                                                                                                                                                                                                                                                                                                                                                                                                                                                                                                                                                                                                                                                                                                                                                                                                                                                                                                                                                                                                                                                                                                                                                                                                                                                                                                                                                                                                                                                                                                                                                                                                                                                                                                                                                                                                                                                                                                                                                                                                                                                                                                                                                                                                                                                                                                                                                                                                                                                                                                                                                                                                                                                                                                                                                                                                                                                                                                                                                                                                                                                                                                                                                                                                                                                                                                                                                                                                                                                                                                                                                                                                                                                                                                                                                                                                                                                                                                                                                                                                                                                                                                                                                                                                                                                                                                                                                                                                                                                                                                                                                                                                                                                                                                                                                                                                                                                                                                                                                                                                                                                                                                                                                                                                                                                                                                                                                                                                                                                                                                                                                                                                                                                                                                                                                                                                                                                                                                                                                                                                                                                                                                                                                                                                                                                                                                                                                                                                                                                                                                                                                                                                                                                                                                                                                                                                                                                                                                                                                                                                                                                                                                                                                                                                                                                                                                                                                                                                                                                                                                                                                                                                                                                                                                                                                                                                                                                                                                                                                                                                                                                                                                                                                                                                                                                                                                                                                                                                                                                                                                                    |  |  |

| Names  | total | elements                                                          |  |  |
|--------|-------|-------------------------------------------------------------------|--|--|
| DIO ND | 93    | Reelin Signaling in Neurons                                       |  |  |
|        |       | Sertoli Cell-Sertoli Cell Junction Signaling                      |  |  |
|        |       | Dopamine Receptor Signaling                                       |  |  |
|        |       | Cdc42 Signaling                                                   |  |  |
|        |       | Intrinsic Prothrombin Activation Pathway                          |  |  |
|        |       | Gap Junction Signaling                                            |  |  |
|        |       | Granulocyte Adhesion and Diapedesis                               |  |  |
|        |       | RhoA Signaling                                                    |  |  |
|        |       | RhoGDI Signaling                                                  |  |  |
|        |       | Glycogen Degradation III                                          |  |  |
|        |       | Synaptogenesis Signaling Pathway                                  |  |  |
|        |       | IL-8 Signaling                                                    |  |  |
|        |       | Coronavirus Pathogenesis Pathway                                  |  |  |
|        |       | Arginine Biosynthesis IV                                          |  |  |
|        |       | Signaling by Rho Family GTPases                                   |  |  |
|        |       | Paxillin Signaling                                                |  |  |
|        |       | ILK Signaling                                                     |  |  |
|        |       | Hepatic Fibrosis / Hepatic Stellate Cell Activation               |  |  |
|        |       | Xenobiotic Metabolism PXR Signaling Pathway                       |  |  |
|        |       | Regulation of Cellular Mechanics by Calpain Protease              |  |  |
|        |       | Ephrin Receptor Signaling                                         |  |  |
|        |       | tRNA Charging                                                     |  |  |
|        |       | Aspartate Degradation II                                          |  |  |
|        |       | Tight Junction Signaling                                          |  |  |
|        |       | Huntington's Disease Signaling                                    |  |  |
|        |       | Gluconeogenesis I                                                 |  |  |
|        |       | Germ Cell-Sertoli Cell Junction Signaling                         |  |  |
|        |       | CCR3 Signaling in Eosinophils                                     |  |  |
|        |       | Pentose Phosphate Pathway                                         |  |  |
|        |       | Semaphorin Neuronal Repulsive Signaling Pathway                   |  |  |
|        |       | Inhibition of ARE-Mediated mRNA Degradation Pathway               |  |  |
|        |       | Agrin Interactions at Neuromuscular Junction                      |  |  |
|        |       | Purine Nucleotides De Novo Biosynthesis II                        |  |  |
|        |       | Protein Kinase A Signaling                                        |  |  |
|        |       | 5-aminoimidazole Ribonucleotide Biosynthesis I                    |  |  |
|        |       | VEGF Signaling                                                    |  |  |
|        |       | Unfolded protein response                                         |  |  |
|        |       | Cellular Effects of Sildenafil (Viagra)                           |  |  |
|        |       | Formaldehyde Oxidation II (Glutathione-dependent)                 |  |  |
|        |       | Virus Entry via Endocytic Pathways                                |  |  |
|        |       | p70S6K Signaling                                                  |  |  |
|        |       | Mechanisms of Viral Exit from Host Cells                          |  |  |
|        |       | Rac Signaling                                                     |  |  |
|        |       | ERK/MAPK Signaling                                                |  |  |
|        |       | Regulation of Actin-based Motility by Rho                         |  |  |
|        |       | Actin Cytoskeleton Signaling                                      |  |  |
|        |       | TCA Cycle II (Eukaryotic)                                         |  |  |
|        |       | HIPPO signaling                                                   |  |  |
|        |       | Clathrin-mediated Endocytosis Signaling                           |  |  |
|        |       | BAG2 Signaling Pathway                                            |  |  |
|        |       | Aldosterone Signaling in Epithelial Cells                         |  |  |
|        |       | Protein Ubiquitination Pathway                                    |  |  |
|        |       | Phagosome Maturation                                              |  |  |
|        |       | Estrogen Receptor Signaling                                       |  |  |
|        |       | Leukocyte Extravasation Signaling                                 |  |  |
|        |       | Insulin Receptor Signaling                                        |  |  |
|        |       | Remodeling of Epithelial Adherens Junctions                       |  |  |
|        |       | Caveolar-mediated Endocytosis Signaling                           |  |  |
|        |       | CTLA4 Signaling in Cytotoxic T Lymphocytes                        |  |  |
|        |       | mTOR Signaling                                                    |  |  |
|        |       | Agranulocyte Adhesion and Diapedesis                              |  |  |
|        |       | Dopamine-DARPP32 Feedback in cAMP Signaling                       |  |  |
|        |       | Thrombin Signaling                                                |  |  |
|        |       | FAK Signaling                                                     |  |  |
|        |       | Xenobiotic Metabolism AHR Signaling Pathway                       |  |  |
|        |       | Pentose Phosphate Pathway (Oxidative Branch)                      |  |  |
|        |       | Integrin Signaling                                                |  |  |
|        |       | Ephrin B Signaling                                                |  |  |
|        |       | RAN Signaling                                                     |  |  |
|        |       | PI3K/AKT Signaling                                                |  |  |
|        |       | Hypoxia Signaling in the Cardiovascular System                    |  |  |
|        |       | HIF1CE± Signaling                                                 |  |  |
|        |       | GP6 Signaling Pathway                                             |  |  |
|        |       | FcCE≥ Receptor-mediated Phagocytosis in Macrophages and Monocytes |  |  |
|        |       | EIF2 Signaling                                                    |  |  |
|        |       | SPINK1 Pancreatic Cancer Pathway                                  |  |  |
|        |       | Inhibition of Matrix Metalloproteases                             |  |  |
|        |       | IGF-1 Signaling                                                   |  |  |
|        |       | Role of PKR in Interferon Induction and Antiviral Response        |  |  |
|        |       | Lipid Antigen Presentation by CD1                                 |  |  |
|        |       | Glycogen Degradation II                                           |  |  |
|        |       | Axonal Guidance Signaling                                         |  |  |
|        |       | CDK5 Signaling                                                    |  |  |
|        |       | FAT10 Signaling Pathway                                           |  |  |
|        |       | Cardiac CE±-adrenergic Signaling                                  |  |  |
|        |       | Actin Nucleation by ARP-WASP Complex                              |  |  |
|        |       | 14-3-3-mediated Signaling                                         |  |  |
|        |       | Inosine-5'-phosphate Biosynthesis II                              |  |  |
|        |       | Semaphorin Signaling in Neurons                                   |  |  |
|        |       | Epithelial Adherens Junction Signaling                            |  |  |
|        |       | Regulation of eIF4 and p70S6K Signaling                           |  |  |
|        |       | NRF2-mediated Oxidative Stress Response                           |  |  |
|        |       | Glycolysis I                                                      |  |  |
| ND     | 20    | fMLP Signaling in Neutrophils                                     |  |  |
|        |       | Natural Killer Cell Signaling                                     |  |  |
|        |       | Neuroprotective Role of THOP1 in Alzheimer's Disease              |  |  |
|        |       | PAK Signaling                                                     |  |  |
|        |       | CXCR4 Signaling                                                   |  |  |
|        |       | 3-phosphoinositide Degradation                                    |  |  |
|        |       | Aryl Hydrocarbon Receptor Signaling                               |  |  |
|        |       | D-myo-inositol (1,4,5,6)-Tetrakisphosphate Biosynthesis           |  |  |
|        |       | Acute Phase Response Signaling                                    |  |  |
|        |       | D-myo-inositol-5-phosphate Metabolism                             |  |  |
|        |       | Chemokine Signaling                                               |  |  |
|        |       | Complement System                                                 |  |  |
|        |       | D-myo-inositol (3,4,5,6)-tetrakisphosphate Biosynthesis           |  |  |
|        |       | Neuregulin Signaling                                              |  |  |
|        |       | Sucrose Degradation V (Mammalian)                                 |  |  |
|        |       | Xenobiotic Metabolism CAR Signaling Pathway                       |  |  |
|        |       | LXR/RXR Activation                                                |  |  |
|        |       | Osteoarthritis Pathway                                            |  |  |
|        |       | Phospholipase C Signaling                                         |  |  |
|        |       | Atherosclerosis Signaling                                         |  |  |
| DIO    | 9     | Superpathway of Serine and Glycine Biosynthesis I                 |  |  |
|        |       | Sirtuin Signaling Pathway                                         |  |  |
|        |       | Granzyme A Signaling                                              |  |  |
|        |       | Oxidized GTP and dGTP Detoxification                              |  |  |
|        |       | Coagulation System                                                |  |  |
|        |       | Superoxide Radicals Degradation                                   |  |  |
|        |       | Spliceosomal Cycle                                                |  |  |
|        |       | Superpathway of Methionine Degradation                            |  |  |
|        |       | Ephrin A Signaling                                                |  |  |

| Names  | total | elements                                                                                                                                                                                                                                                                                                                                                                                                                                                                                                                                                                                                                                                                                                                                                                                                                                                                                                                                                                                                                                                                                                                                                                                                                                                                                                                                                                                                                                                                                                                                                                                                                                                                                                                                                                                                                                                                                                                                                                                                                                                                                                                                                                                                                                                                                                                                                                                                                                                                                                                                                                                                                                                                                                                                                                                                                                                                                                                                                                                                                                                                                                                                                                                                                                                                                                                                                                                                                                                                                                                                                                                                                                                                                                                                                                                                                                                                                                                                                                                                                                                                                                                                                                                                                                                                                                                                                                                                                                                                                                                                                                                                 |    |                                                                                                                                                                                                                                                                                                                                                                                                                                                                                                                                                                                                                                                                                                                                                                                                                                                                                                                                  |    |                                                                                                                                                                                                                                                                                                                                                                                                                                   |
|--------|-------|----------------------------------------------------------------------------------------------------------------------------------------------------------------------------------------------------------------------------------------------------------------------------------------------------------------------------------------------------------------------------------------------------------------------------------------------------------------------------------------------------------------------------------------------------------------------------------------------------------------------------------------------------------------------------------------------------------------------------------------------------------------------------------------------------------------------------------------------------------------------------------------------------------------------------------------------------------------------------------------------------------------------------------------------------------------------------------------------------------------------------------------------------------------------------------------------------------------------------------------------------------------------------------------------------------------------------------------------------------------------------------------------------------------------------------------------------------------------------------------------------------------------------------------------------------------------------------------------------------------------------------------------------------------------------------------------------------------------------------------------------------------------------------------------------------------------------------------------------------------------------------------------------------------------------------------------------------------------------------------------------------------------------------------------------------------------------------------------------------------------------------------------------------------------------------------------------------------------------------------------------------------------------------------------------------------------------------------------------------------------------------------------------------------------------------------------------------------------------------------------------------------------------------------------------------------------------------------------------------------------------------------------------------------------------------------------------------------------------------------------------------------------------------------------------------------------------------------------------------------------------------------------------------------------------------------------------------------------------------------------------------------------------------------------------------------------------------------------------------------------------------------------------------------------------------------------------------------------------------------------------------------------------------------------------------------------------------------------------------------------------------------------------------------------------------------------------------------------------------------------------------------------------------------------------------------------------------------------------------------------------------------------------------------------------------------------------------------------------------------------------------------------------------------------------------------------------------------------------------------------------------------------------------------------------------------------------------------------------------------------------------------------------------------------------------------------------------------------------------------------------------------------------------------------------------------------------------------------------------------------------------------------------------------------------------------------------------------------------------------------------------------------------------------------------------------------------------------------------------------------------------------------------------------------------------------------------------------------------------|----|----------------------------------------------------------------------------------------------------------------------------------------------------------------------------------------------------------------------------------------------------------------------------------------------------------------------------------------------------------------------------------------------------------------------------------------------------------------------------------------------------------------------------------------------------------------------------------------------------------------------------------------------------------------------------------------------------------------------------------------------------------------------------------------------------------------------------------------------------------------------------------------------------------------------------------|----|-----------------------------------------------------------------------------------------------------------------------------------------------------------------------------------------------------------------------------------------------------------------------------------------------------------------------------------------------------------------------------------------------------------------------------------|
| DIO ND | 384   | VDR<br>PPARD<br>CD44<br>ethoxyquin<br>PAX7<br>1,2-dithiol-3-thione<br>ROCK1<br>ZAP70<br>ATF6<br>Creb<br>Secalictol<br>DCX<br>EDN1<br>PLG<br>PPARGC1A<br>galactose<br>MEF2D<br>CREB3L2<br>N-propyl bromide<br>CACNA1C<br>Akt<br>SOX7<br>ILK<br>BRD4<br>NCOA3<br>IGF1<br>genfibrozil<br>MAPK14<br>TGF2<br>PTX2<br>AGN194204<br>WNT1<br>RAB1B<br>isobutylmethylxanthine<br>RAC1<br>CCN2<br>CCL5<br>DPP-23<br>TP53<br>CD3<br>Gefitinib<br>D-glucose<br>VBP1<br>LINC01139<br>homocysteine<br>MITF<br>dinoprost<br>poly r(r):C-RNA<br>PDGF BB<br>STK11<br>FLT1<br>TNF<br>inosine<br>INSR<br>TGFBR2<br>RGS19<br>LCK<br>EZF<br>NCX-4040<br>DDX5<br>RAF1<br>gentamicin C<br>CAPN3<br>ERK<br>EIF4E<br>HOTAIR<br>5-hydroxytryptamine<br>EGF<br>USF2<br>CCR2<br>thioacetamide<br>MMP1<br>FGF1<br>1-methyl-4-phenyl-1,2,3,6-tetrahydropyridine<br>dexmethasone<br>SERPINH1<br>H1f1<br>butylated hydroxyanisol<br>diethylnitrosamine<br>PPARA<br>cadmium<br>SOX4<br>KLF15<br>CD300LF<br>CD24<br>TCF7L2<br>Gm15807/Hmg5<br>Brd4<br>PKM<br>sodium arsenite<br>TEAD1<br>CALR<br>LEP<br>L-triiodothyronine<br>SRC (family)<br>LDL<br>WR 1065<br>MYCBP<br>rhodiolsolide<br>ter-butyl-hydroquinone<br>SFRQ<br>ELAVL1<br>TGF2<br>Z-L1-CHO<br>sucrose<br>PI3K (family)<br>geldanamycin<br>CAB39L<br>LIMS2<br>AKT1<br>PRKCB<br>JAK2<br>PTPN3<br>guanidinopropionic acid<br>2-amino-1-methyl-6-phenylimidazo-4-5-b-pyridine<br>Roxk<br>MAP2K5<br>Firn<br>PRL<br>Insulin<br>ETV4<br>NR1H3<br>UTP<br>ROCK2<br>nitric oxide<br>cisplatin<br>MYCL<br>SPP1<br>LINC00842<br>testosterone<br>lomustine<br>Igs<br>F2<br>cephaloridine<br>OSM<br>TFEB<br>YAP1<br>PI3K (complex)<br>6-hydroxydopamine<br>crocidolite asbestos<br>IRAK3<br>NCF1<br>arsenite<br>FGF7<br>CTHNB1<br>MLXIP<br>H1-6<br>gentamicin<br>MKNK1<br>AKT2<br>EGFR<br>clofibrate<br>IKBK<br>CBR-470-1<br>SP1<br>CD38<br>aurothioglucose<br>vancomycin<br>VTN<br>SYN1<br>allopurinol<br>2-bromoethylamine<br>bisphenol A<br>EBF1<br>ethionine<br>diquat<br>bortezomib<br>phytohemagglutinin<br>KDM8<br>diethylmaleate<br>arsenic<br>HTT<br>cardiotoxin<br>PCEM1<br>UCP1<br>SEMA7A<br>IL15<br>3,5-diodothyronine<br>ESR1<br>ACLY<br>ERBB2<br>RLIM<br>KITLG<br>MAPK7<br>ARNT<br>LCN2<br>rosiglitazone<br>ELL2<br>HBEFG<br>ZBTB7B<br>CCAR2<br>PTK2<br>FOS<br>FNG<br>IPMK<br>methotrexate<br>FLI1<br>17-alpha-ethinylestradiol<br>CSF1<br>RETN<br>JUNB<br>SMARCB1<br>LLGL2<br>ILA<br>SREBF1<br>bardoxolone<br>CD28<br>cis-urocanic acid<br>HNRNPR<br>MUC1<br>pirinixic acid<br>Collagen type I (complex)<br>EPAS1<br>bezafibrate<br>carbon tetrachloride<br>D-fructose<br>mibolerone<br>PDGF (family)<br>TEAD3<br>phosphate<br>SPZ1<br>RABL6<br>FGF2<br>genistein<br>palmitic acid<br>NORAD<br>MAP2K4<br>CH-223191<br>Pdgf (complex)<br>PFDN6<br>acetaminophen<br>LAMTOR1<br>cadmium chloride<br>SRFBF2<br>LINC51<br>VEGFA<br>tretinoin<br>mini-GAGR<br>THR8<br>CDH11<br>triamterene<br>LIN28A<br>IL3<br>GNA12<br>sphingosine-1-phosphate<br>TGF2<br>fenofibrate<br>Cdc42<br>ADORA2A<br>EDNRA<br>S100A6<br>IGF1R<br>CEBPB<br>METTL3<br>Tgf beta<br>GAST<br>HIF1<br>EIF3M<br>F10<br>5-azacytidine<br>HSF2<br>beta-estradiol<br>MYC<br>F2R<br>ESRA<br>ERN1<br>PFDN5<br>STAT4<br>JUN<br>nitrofurantoin<br>BCL2L1<br>KDM3A<br>azetidyl-2-carboxylic acid<br>TO-901317<br>E2F1<br>NSUN6<br>NRG1<br>ROK1<br>estrogen<br>FBXO2<br>ciprofibrate<br>PPARGC1B<br>methapyrene<br>AR<br>INHBB<br>benzo(a)pyrene<br>bleomycin<br>TAZ<br>Calcineurin A<br>phenylbutazone<br>MRTFA<br>forskolin<br>NFE2L1<br>OKI<br>methylprednisolone<br>MAP2K3<br>FOXF1<br>elaidic acid<br>methylnitrosourea<br>SCAP<br>AGTR2<br>IL5<br>AGT<br>tunicamycin<br>MAP3K1<br>ERK<br>E2F3<br>Smad2/3/4<br>MYCN<br>HSP90B1<br>EPO<br>progesterone<br>PPARG<br>GNA13<br>indomethacin<br>MAFF<br>ATF4<br>hexachlorobenzene<br>L-glutamic acid<br>uranyl nitrate<br>mono-(2-ethylhexyl)phthalate<br>FOXO3<br>lipopolyaccharide<br>ASPC1<br>feramic acid<br>RHOA<br>Hbb-b1<br>TCR<br>CD247<br>IKBKE<br>HIF1A<br>PRKCA<br>PLA2R1<br>CD40LG<br>HGF<br>MRTFB<br>SRFBF1<br>NR1D1<br>EIF2AK3<br>RET<br>MASTL<br>PTH<br>cholic acid<br>TCF4<br>Srebp<br>coal tar<br>RB1<br>SMYD1<br>PDGFC<br>prostaglandin J2<br>lactacystin<br>TP53<br>AP<br>EGR1<br>(-)-norphephrine<br>NFYA<br>IGF2BP1<br>thapsigargin<br>Ins1<br>dihydrotestosterone<br>PNPLA2<br>SRC<br>HBA1/HBA2<br>KNG1<br>XBP1<br>CASR<br>MTPN<br>metribolone<br>FN1<br>USF1<br>hydrogen peroxide<br>PGR<br>PFDN2<br>MIR143-145a<br>ammonium chloride<br>FGF10<br>EIF2AK4<br>ANGPT2<br>Gm26313<br>NFE2L2<br>cinnamaldehyde<br>NR1<br>cigarette smoke<br>MYOD1<br>ND | 70 | Pro-inflammatory Cytokine<br>TIMP0<br>IFI16<br>desoxycorticosterone<br>leupeptin<br>AIFM1<br>RAS<br>WWTR1<br>Pkc(s)<br>PLA2G4A<br>phenacetin<br>ITGB6<br>tetradecanoylphorbol acetate<br>Vmi<br>NFASC<br>mycophenolic acid<br>S1PR2<br>PIK3R1<br>GLI1<br>PTCD1<br>RUVBL1<br>Ras homolog<br>BMP7<br>TNFSF11<br>MAP2K1<br>THBS4<br>TL1B<br>IL1B<br>FOXM1<br>oxidized glycation end-products<br>CYP2E1<br>tosedostat<br>FGF21<br>IL2<br>ATM<br>streptozocin<br>PFKFB3<br>farnesyl pyrophosphate<br>SMARCA4<br>F3<br>BRD7<br>NR12<br>CXCL12<br>anandamide<br>lysophosphatidic acid<br>SMAD4<br>FLS<br>RETNLB<br>BML-284<br>H2AX<br>NOTCH3<br>trypsin<br>TIMP1<br>AIF1<br>aldesleukin<br>ERK1/2<br>AIMP2<br>TWIST1<br>JAK1<br>progesterone<br>MMP1<br>C11orf95-RELA<br>growth hormone<br>platelet activating factor<br>CXCL8<br>1,4-bis[2-(3,5-dichloropyridyloxy)]benzene<br>DERNDE<br>deferoxamine<br>ARNT2<br>KLF6<br>NR113<br>DIO | 33 | RPTOR<br>BMP6<br>PF111B<br>CFR1<br>RARA<br>LOX<br>CCN1<br>NGF<br>NEDD9<br>NKX2-2-AS1<br>beta-naphthoflavone<br>NKX2-3<br>reactive oxygen species<br>3,4,5,3',4'-pentachlorobiphenyl<br>Fus<br>ITGB3<br>CD3 group<br>CNR1<br>lithium chloride<br>GF-120918<br>tetracycline<br>iron<br>HELLS<br>DDX3X<br>3-methylcholanthrene<br>WBP2<br>4-octyl itaconate<br>bee venom<br>triclosan<br>isoquercitrin<br>SOX2-OT<br>CLDN7<br>NuP107 |
